# Supplementary material for: Association between SpO2 and the risk of death in elderly T2DM patients with cerebral infarction: a retrospective cohort study
Source: Frontiers journal article supplement (doi:10.3389/fneur.2024.1344000), 2024-03-12

## *Supplementary Material*

### **Association Between SpO<sub>2</sub> and The Risk of Death in Elderly T2DM Patients with Cerebral Infarction: A Retrospective Cohort Study**

**Shuo Zhang<sup>1</sup>, Jiaqi Ji<sup>1</sup>, Siqi Gao<sup>2</sup>, Shu Yang<sup>1</sup>, Zeyi Song<sup>1</sup>, Jianmin Li<sup>1</sup>, Junjie Liu<sup>1\*</sup>**

<sup>1</sup> School of Clinical Medicine, North China University of Science and Technology, Tangshan, China

<sup>2</sup> School of Basic Medical Sciences, North China University of Science and Technology, Tangshan, China

**\* Correspondence:**

Corresponding Author: Junjie Liu

linchuangljj@ncst.edu.cn

#### **1 Supplementary Figures and Tables**

##### **1.1 Supplementary Figures**

The four levels of SpO<sub>2</sub> (SpO<sub>2</sub> ≤ 94.5, 94.5 < SpO<sub>2</sub> ≤ 96.5, 96.5 < SpO<sub>2</sub> ≤ 98.5, SpO<sub>2</sub> > 98.5) were determined by pre-experiments. Not included in the article due to space limitations. The details are as follows: with the 1-year mortality of elderly T2DM patients with cerebral infarction as the dependent variable and SpO<sub>2</sub> as the independent variable, computer simulation was carried out based on MATLAB software, and the data of 448 patients were randomly sampled 50 times, with 300 patients selected for each time. Fifty relationship curves were constructed using restricted cubic splines. It was observed that when the SpO<sub>2</sub> of patients was in the range of (94.5, 96.5), the risk of death of patients was very low. At the same time, moving 2% to the right, we established an SpO<sub>2</sub> cutoff point of 98.5% for high and notably high oxygen-saturation to compare survival in these two conditions.

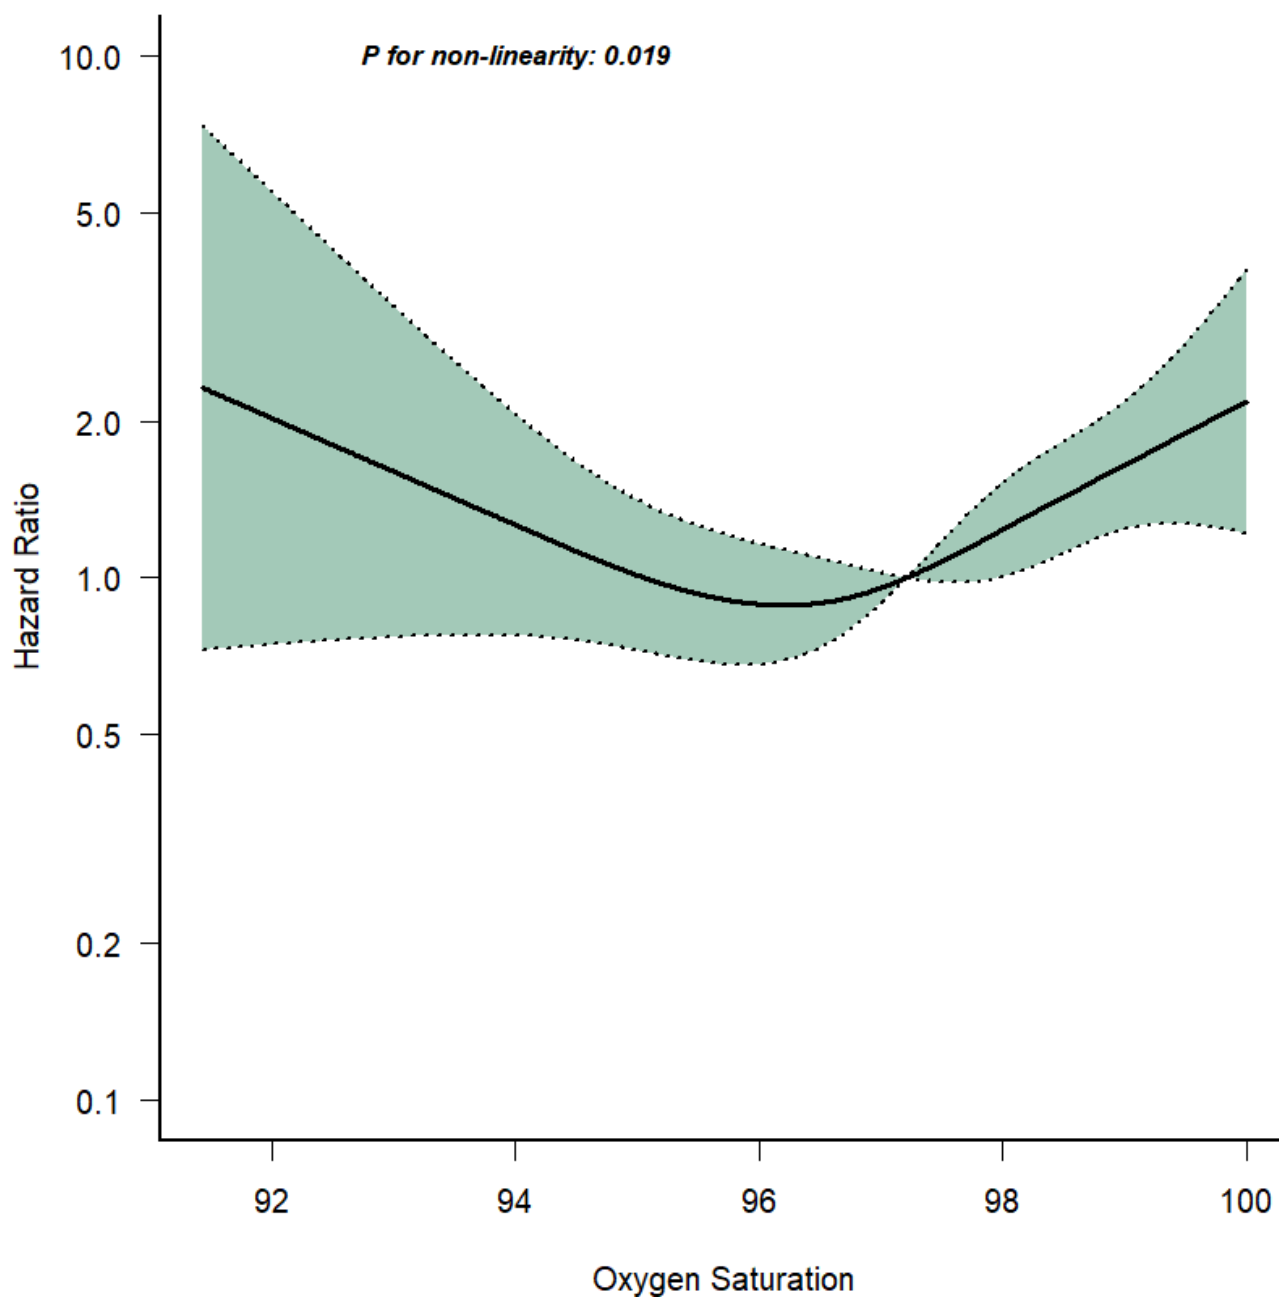

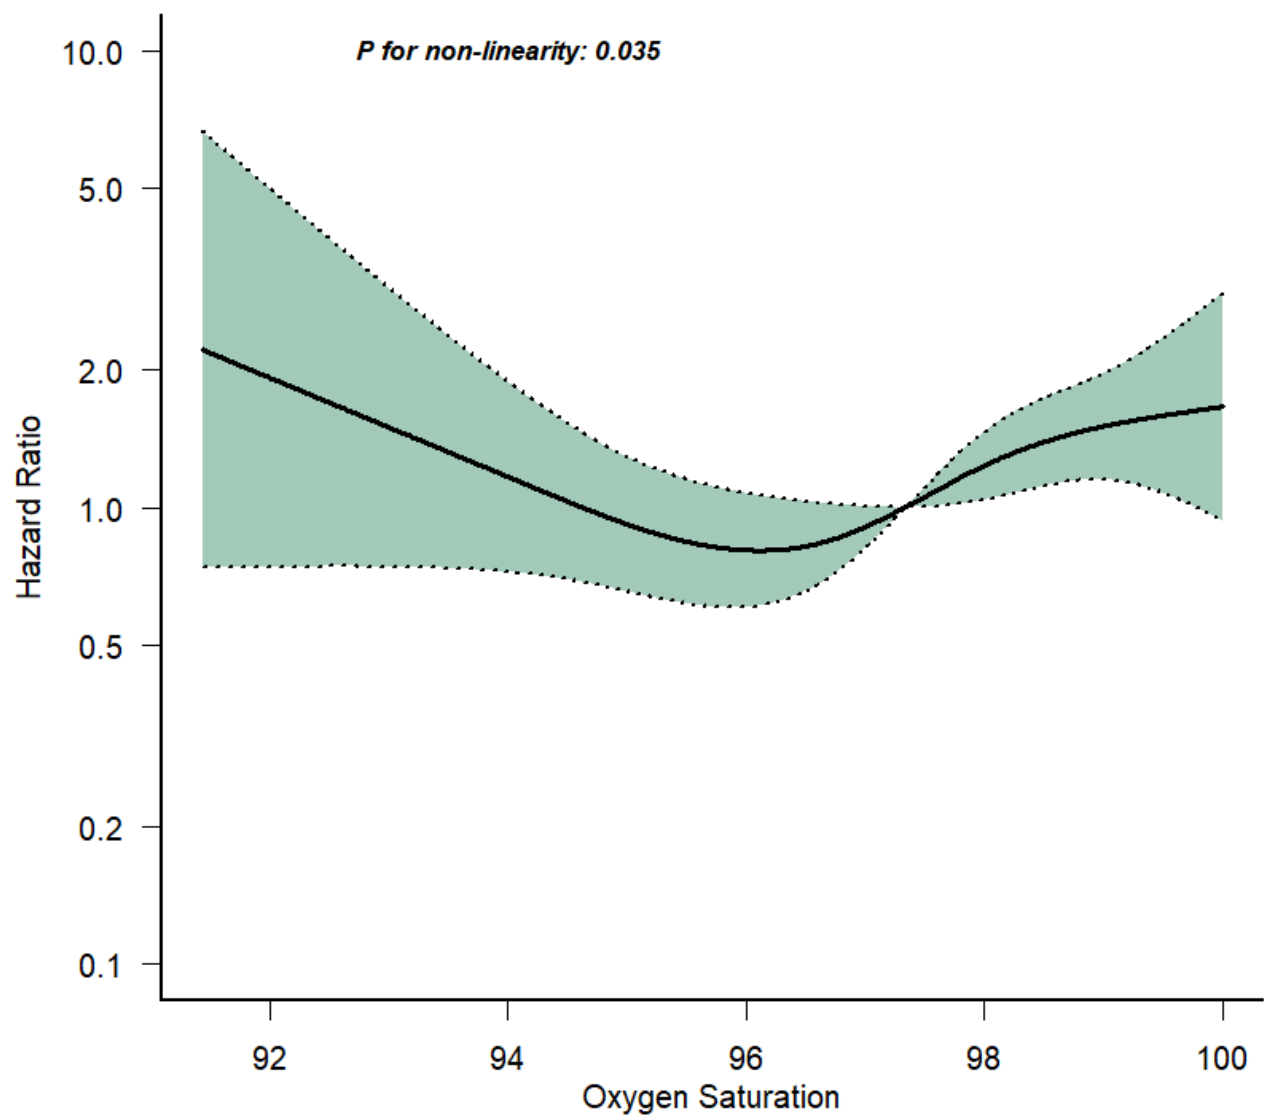

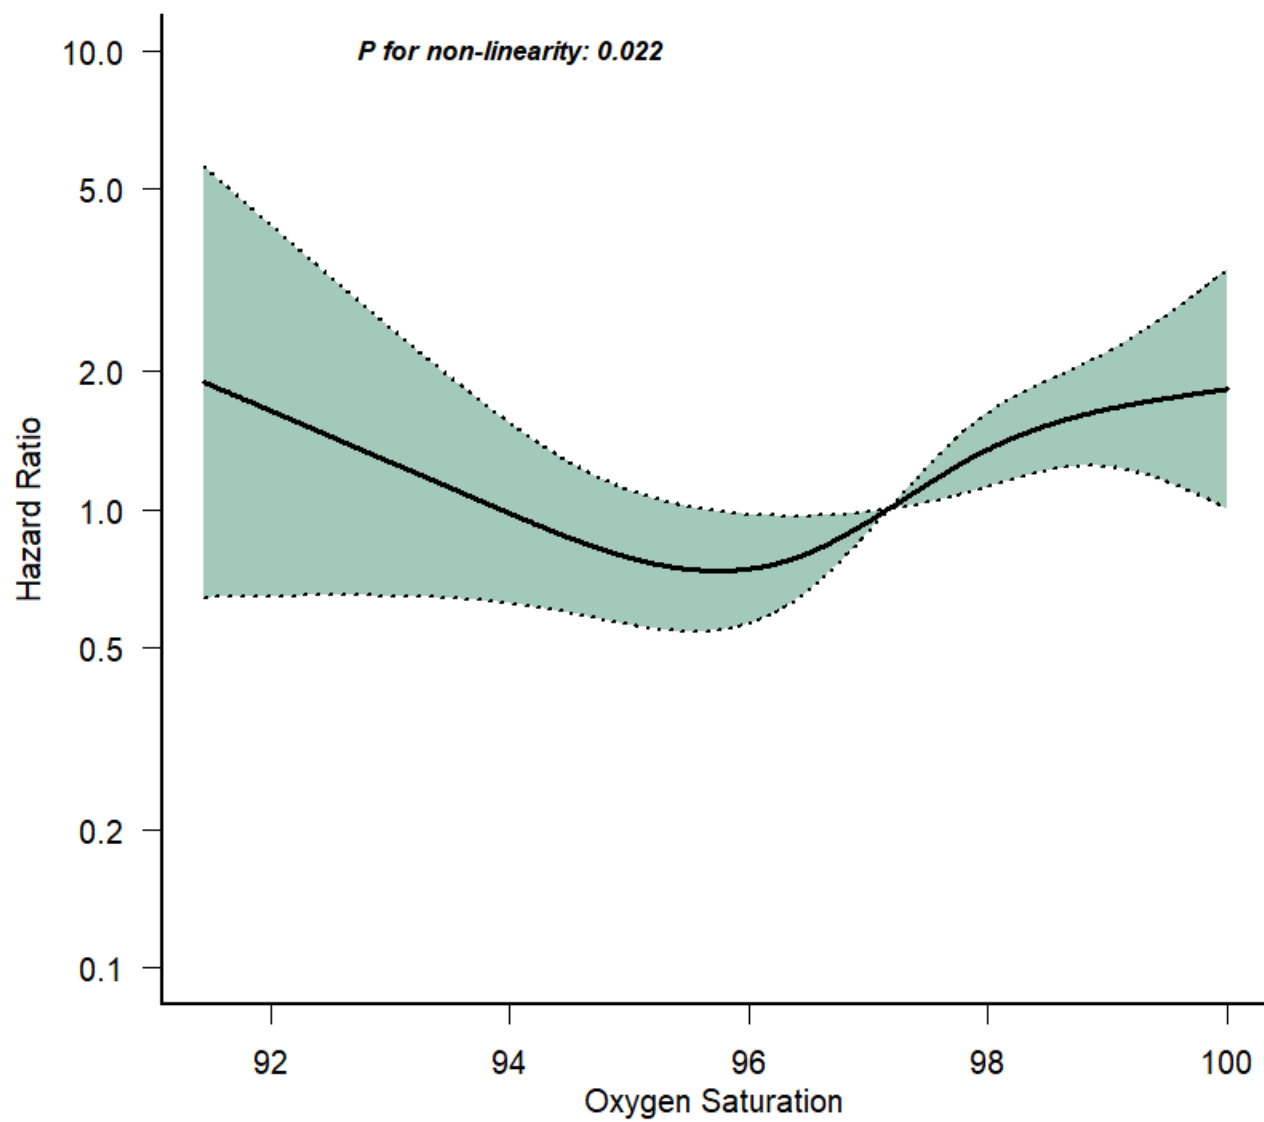

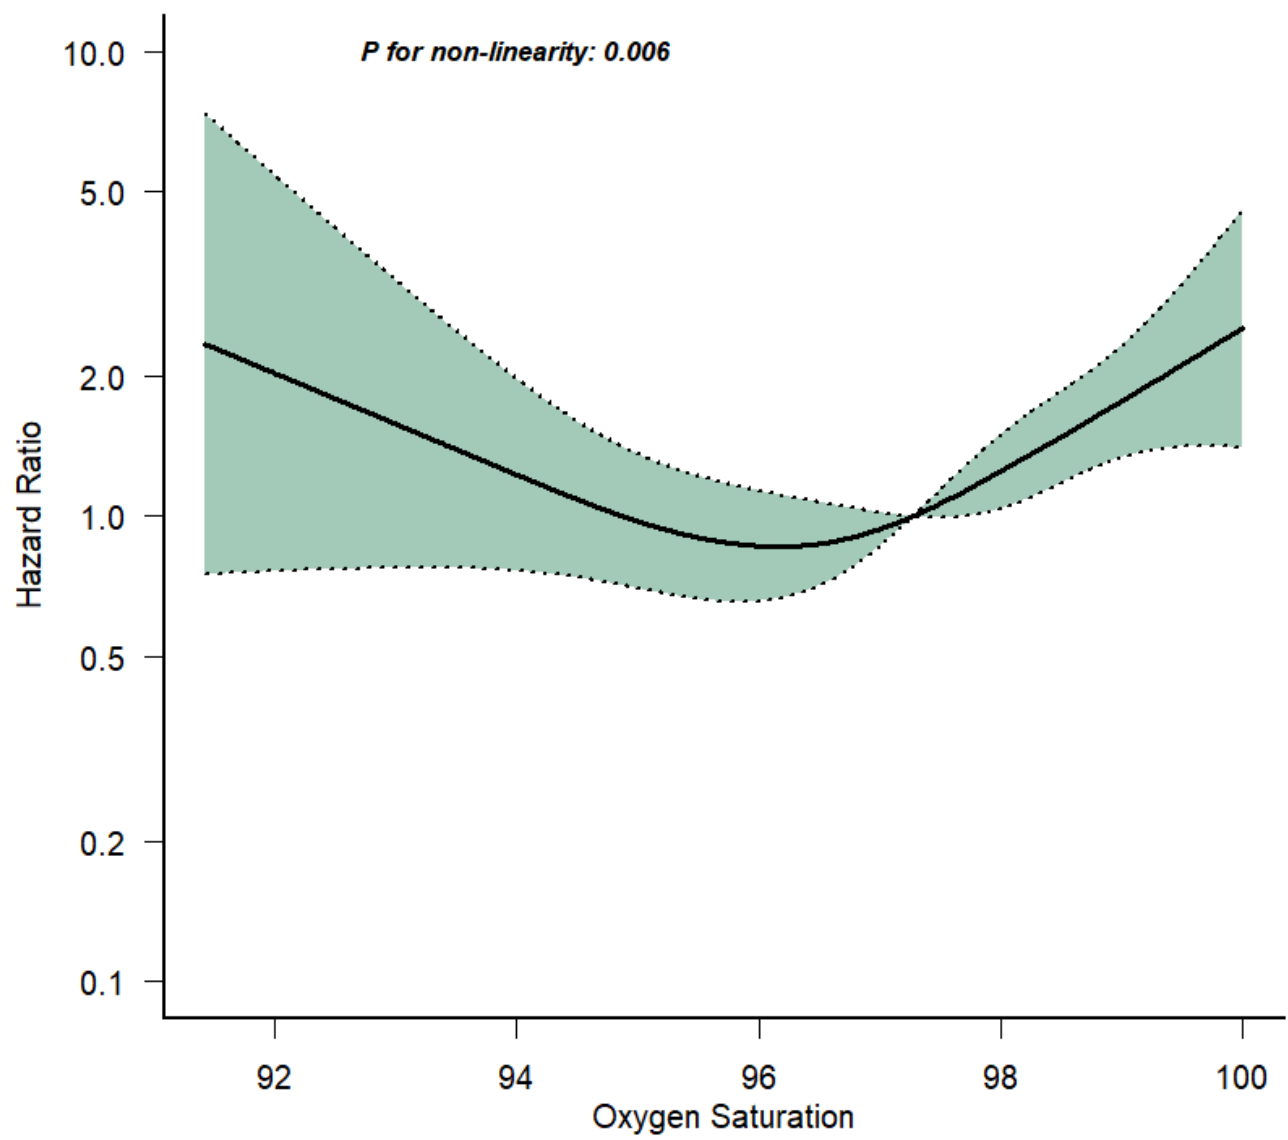

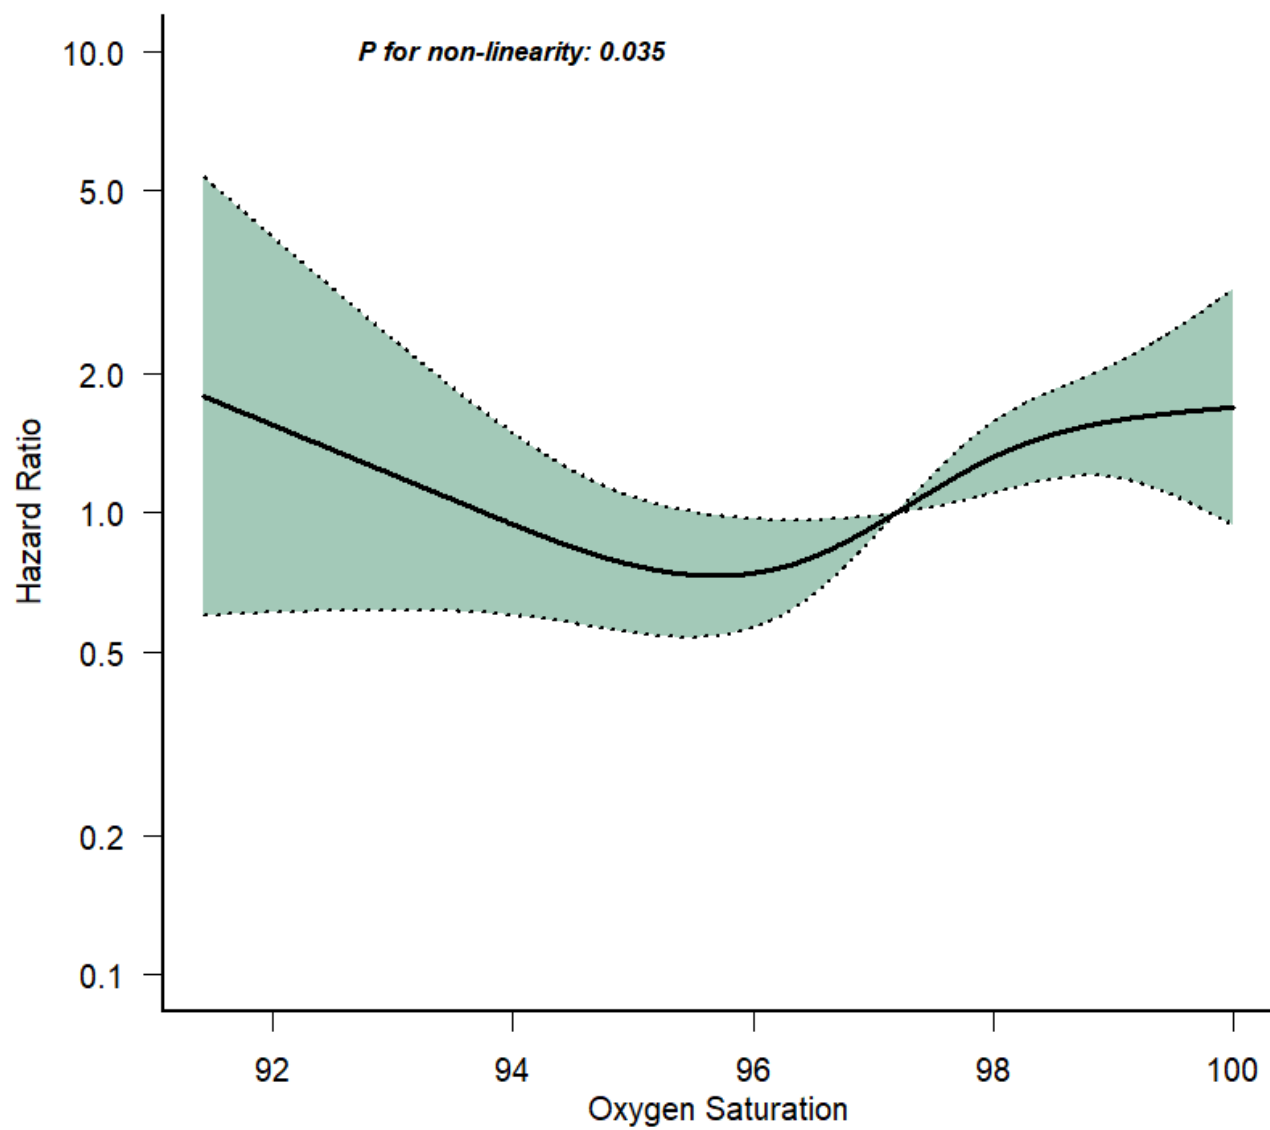

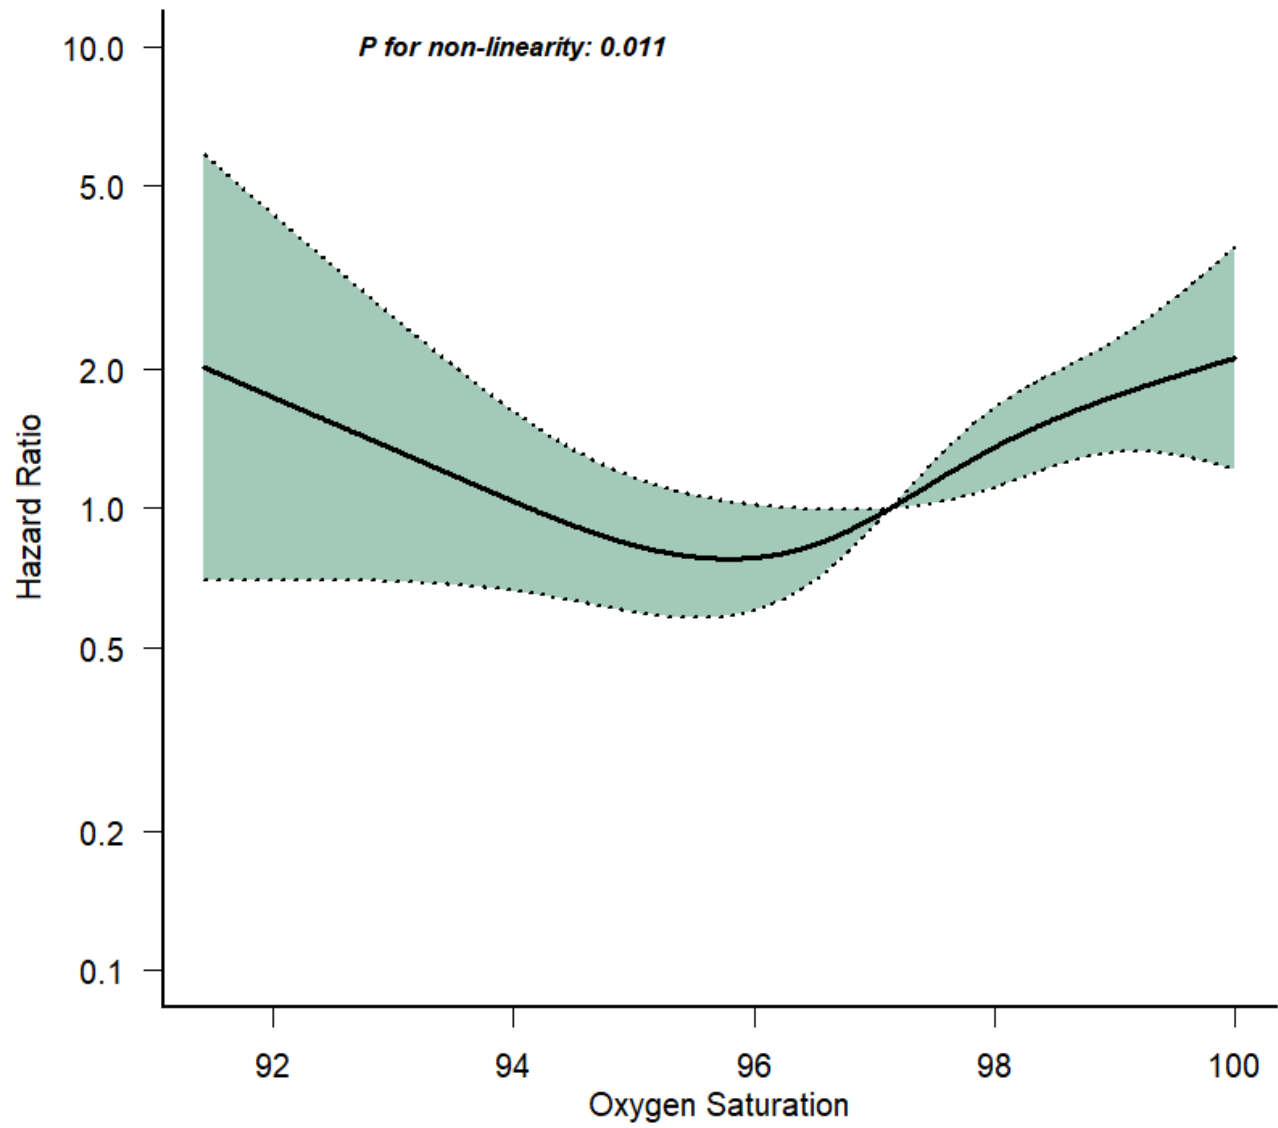

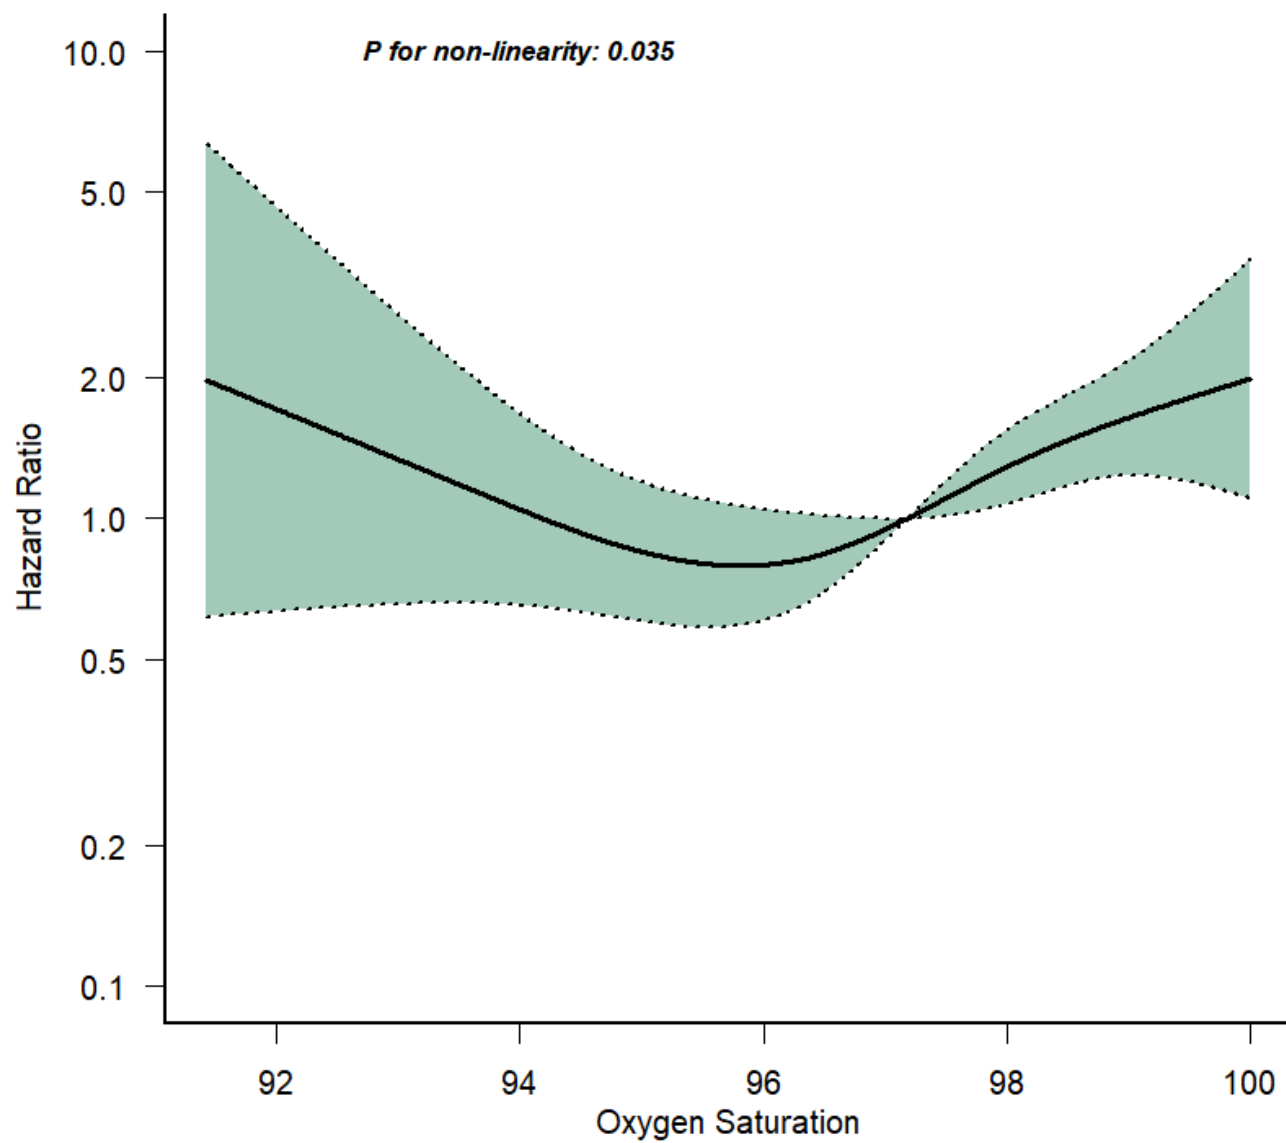



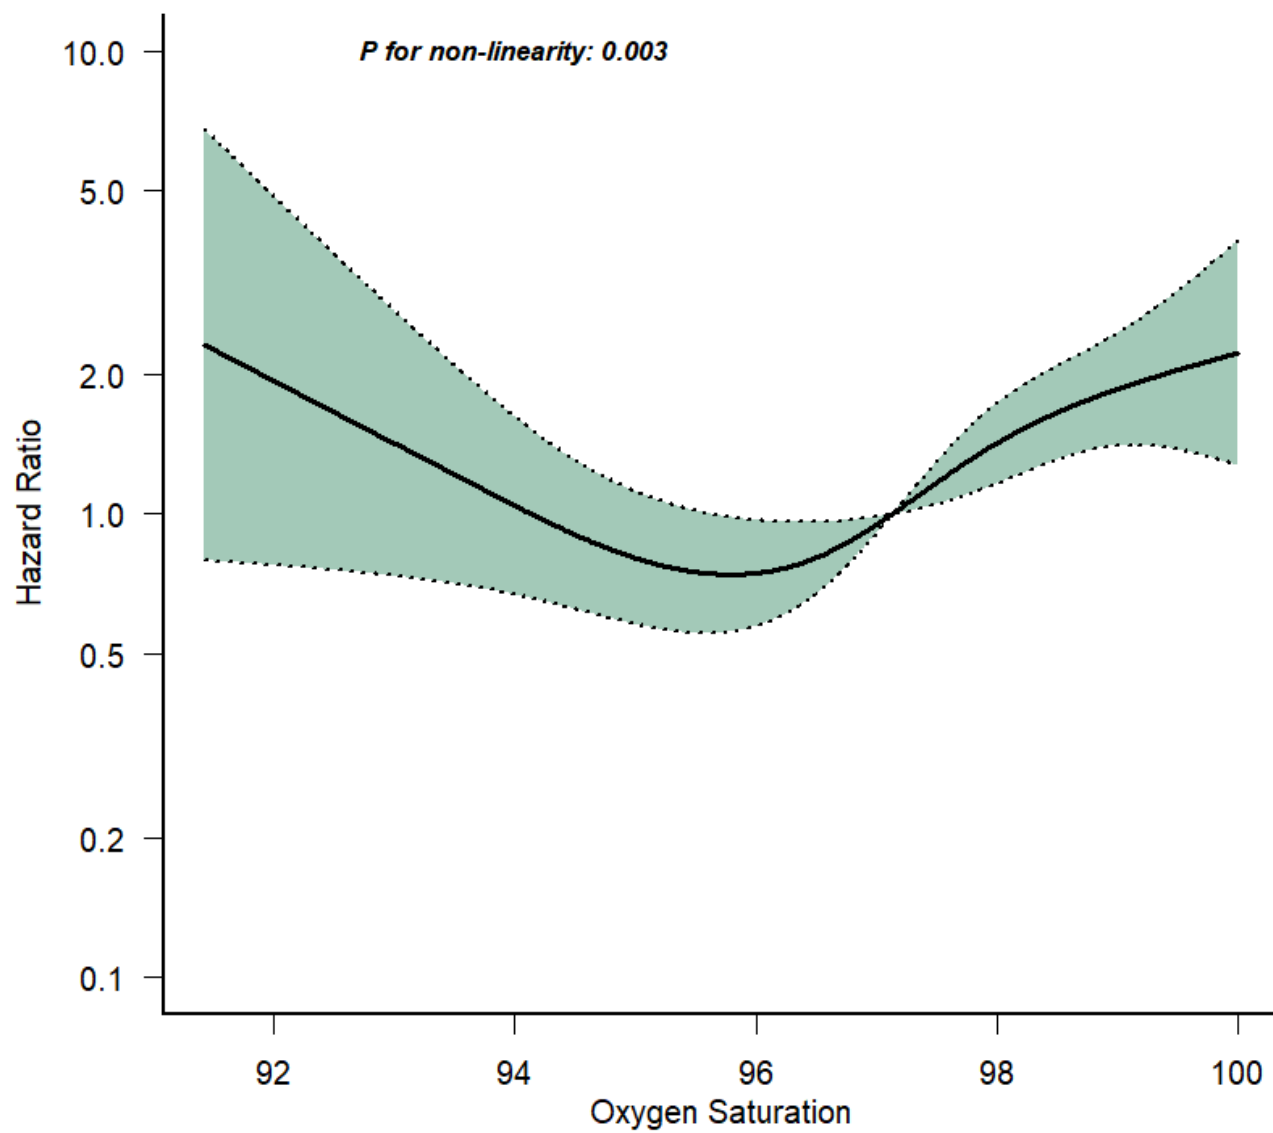

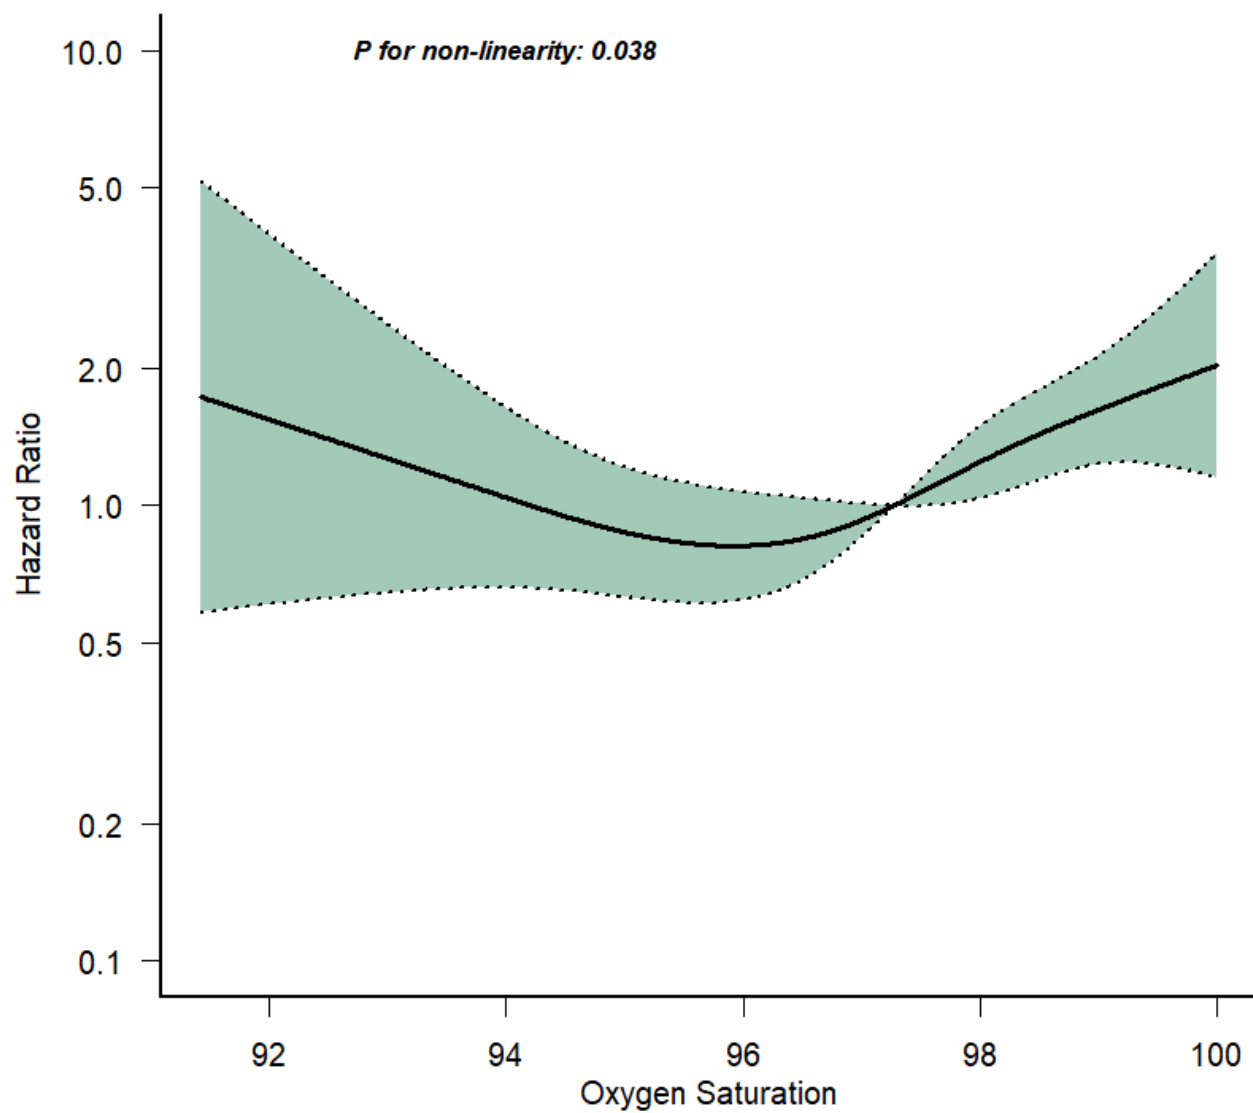

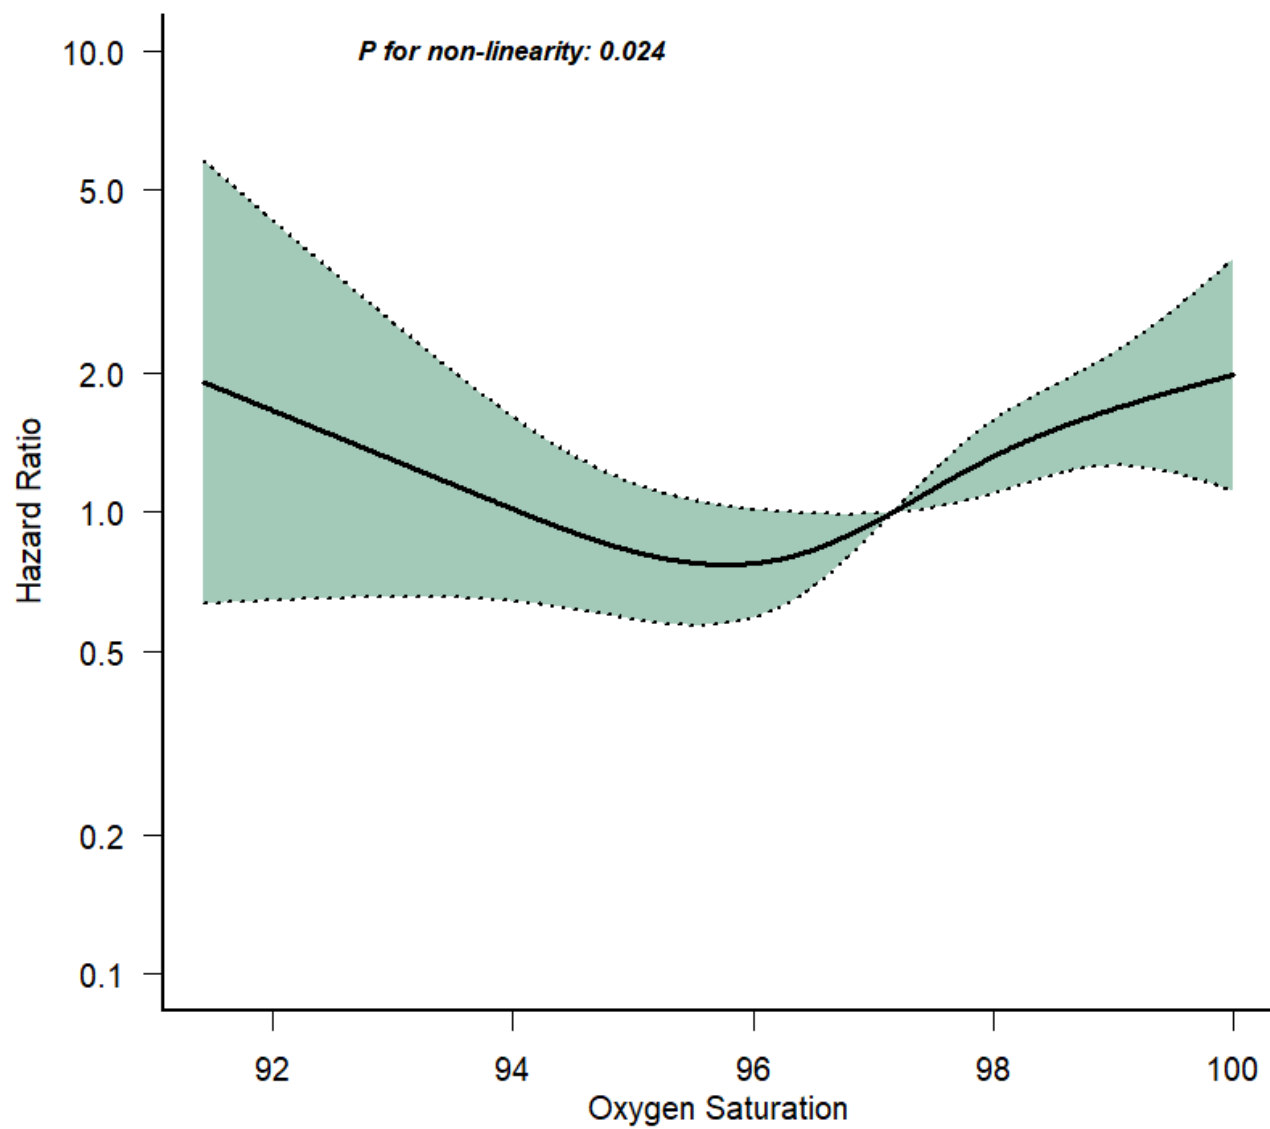

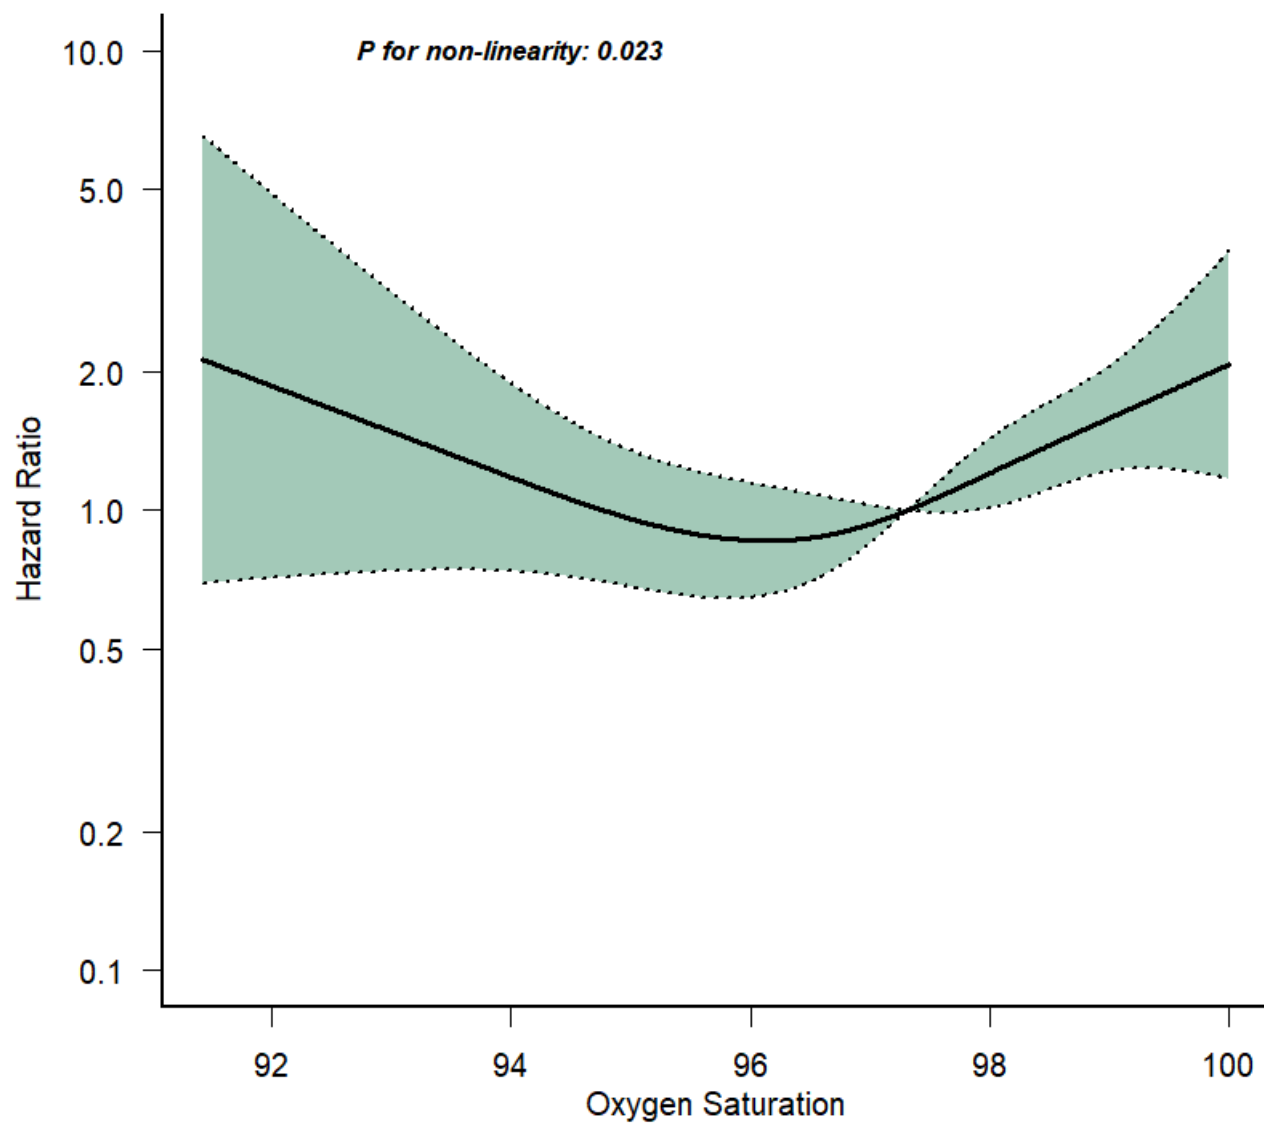

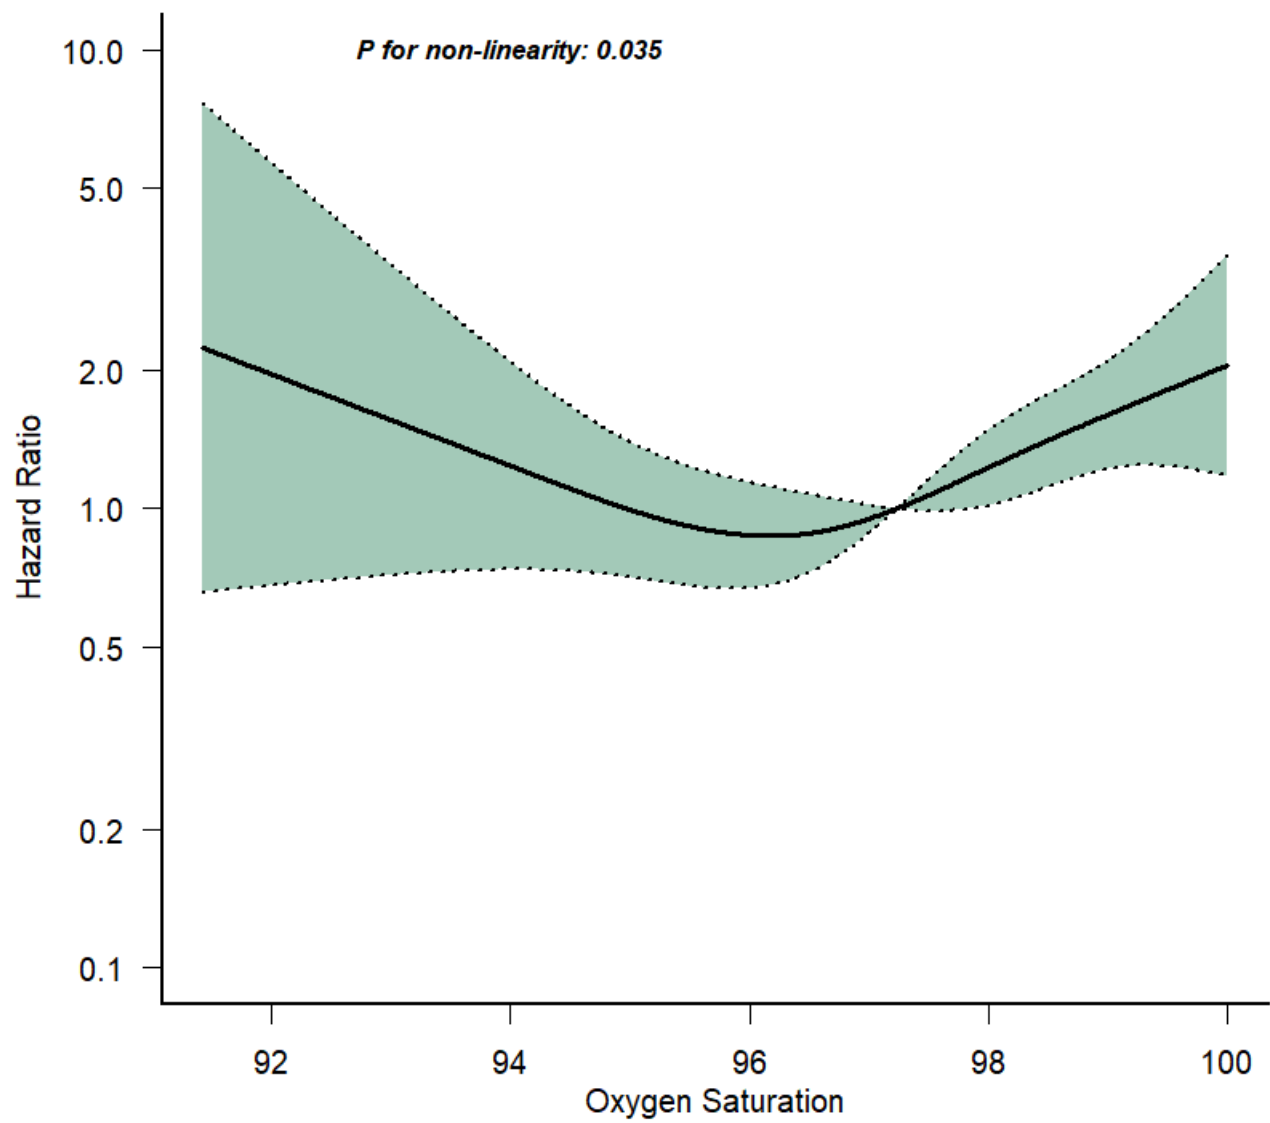

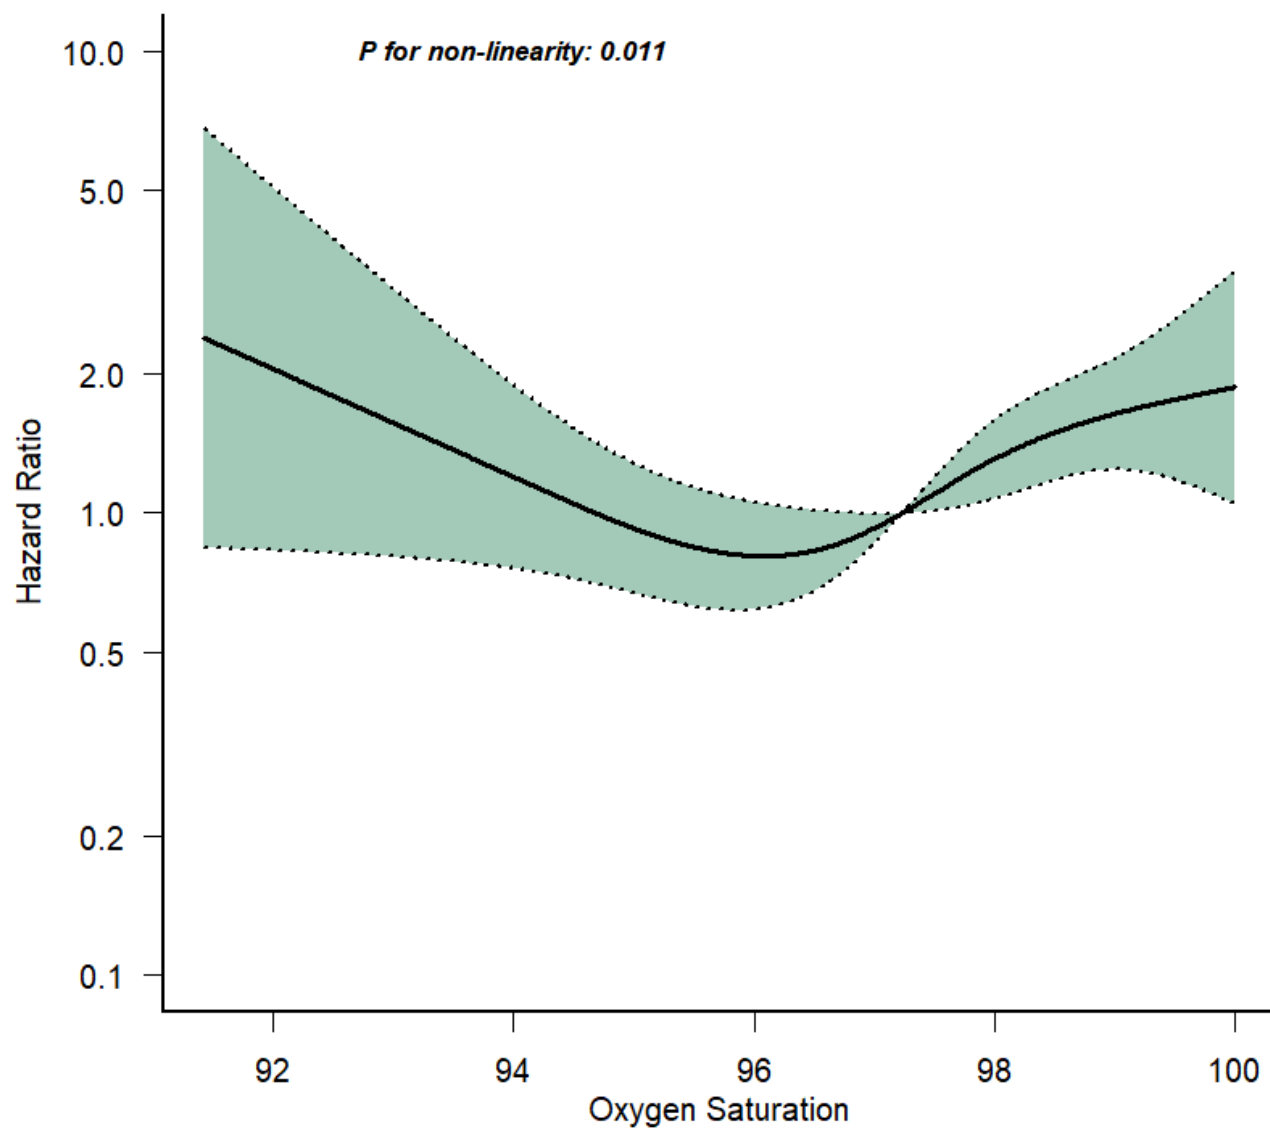

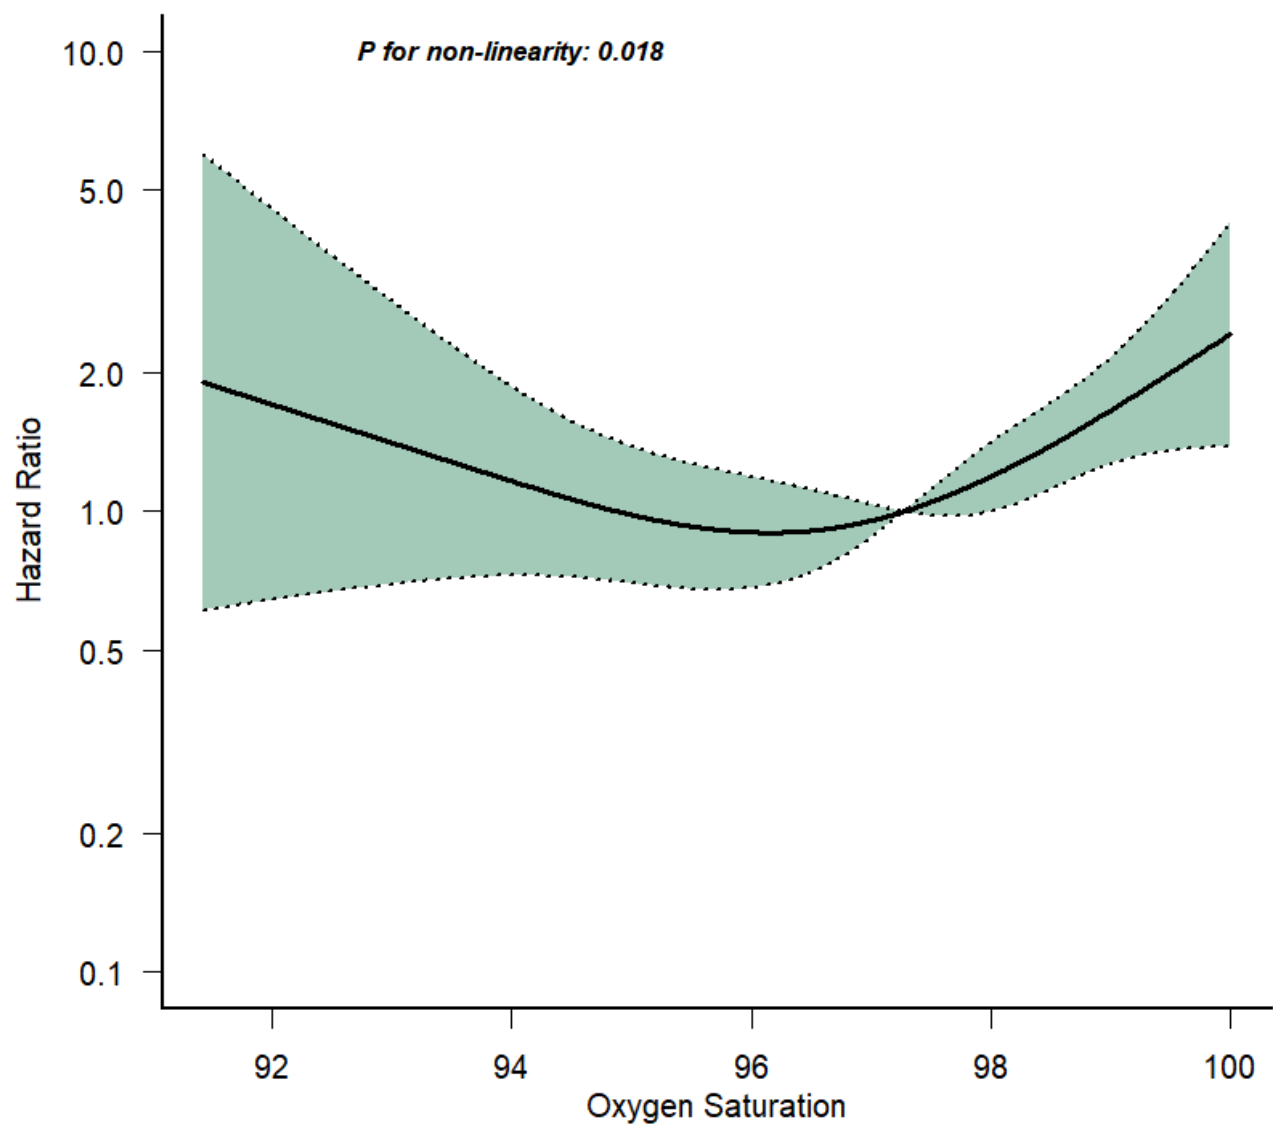

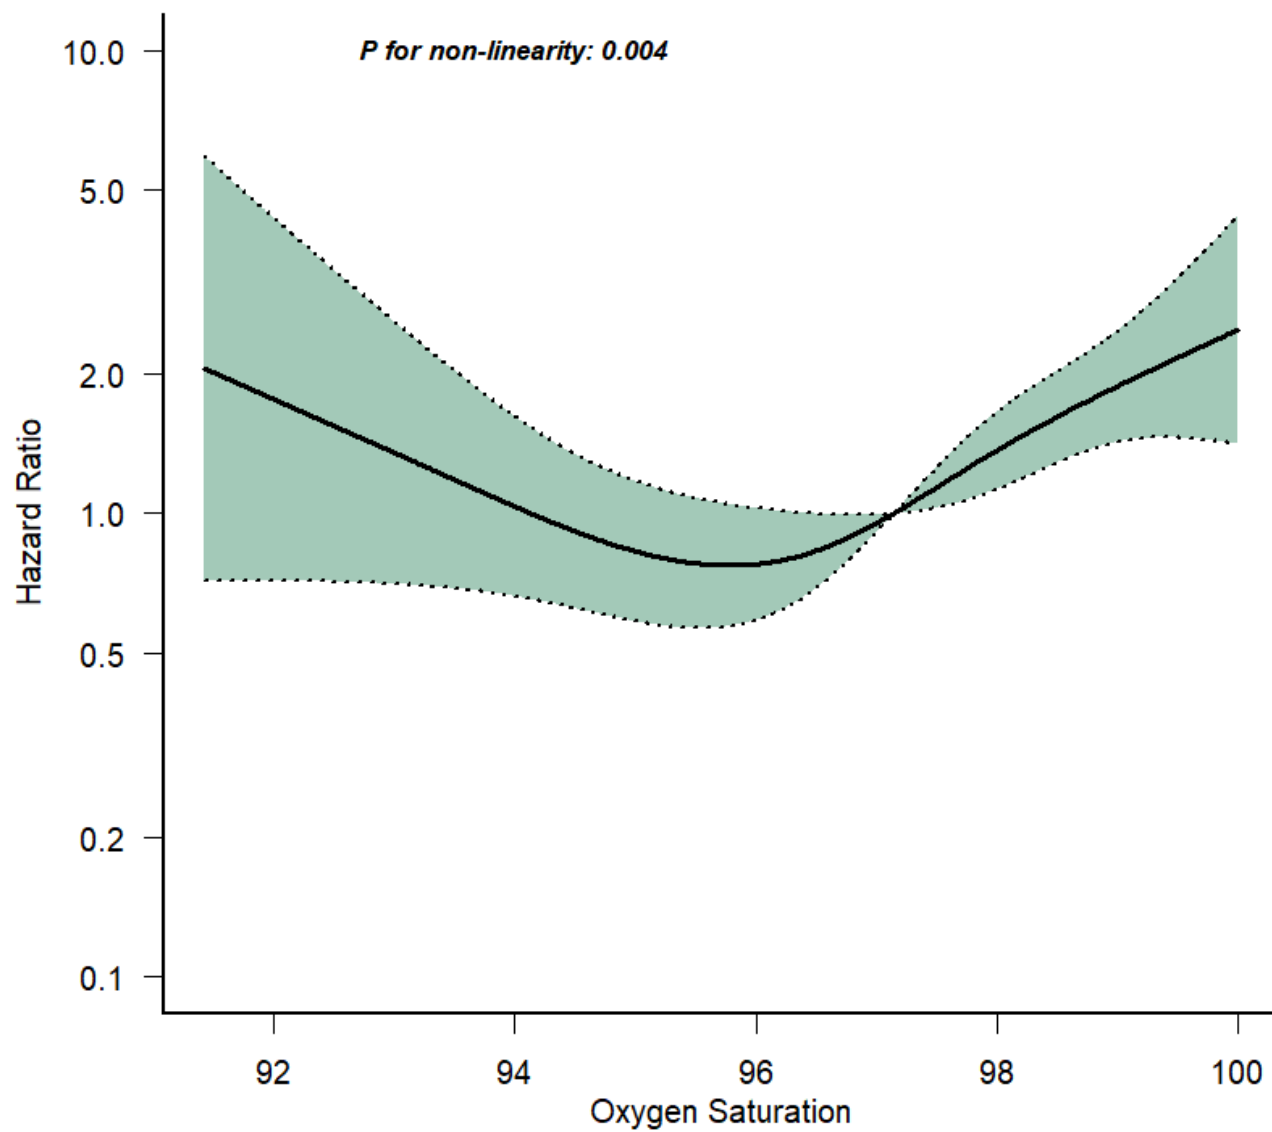



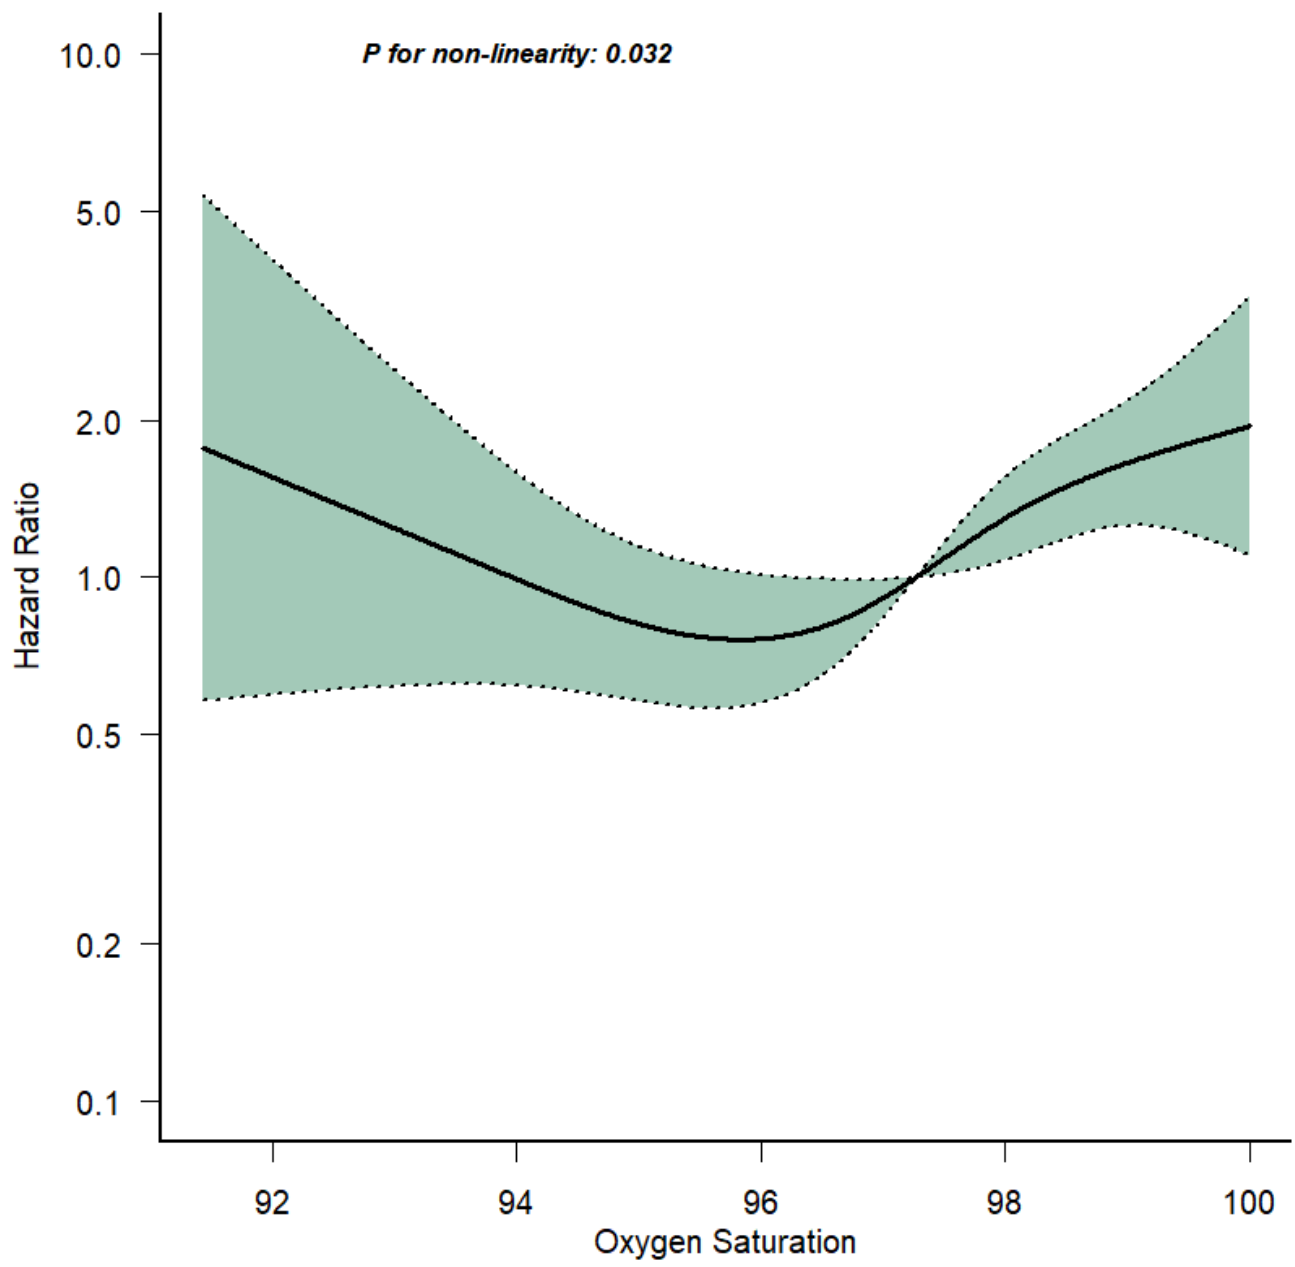

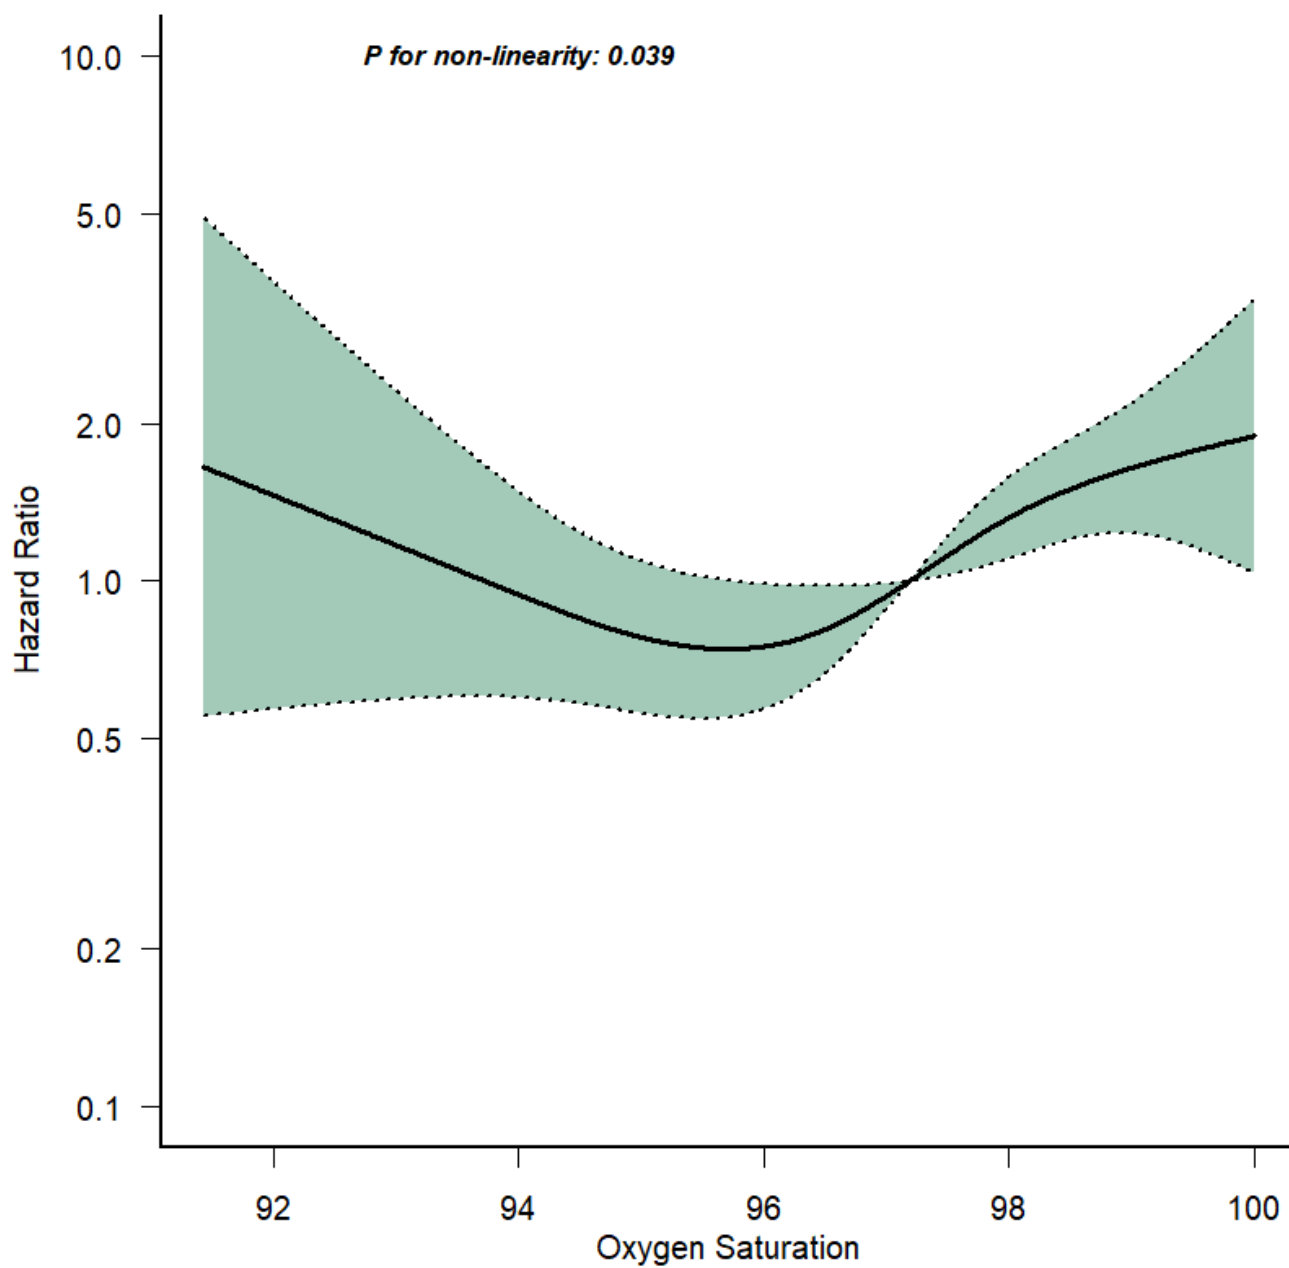

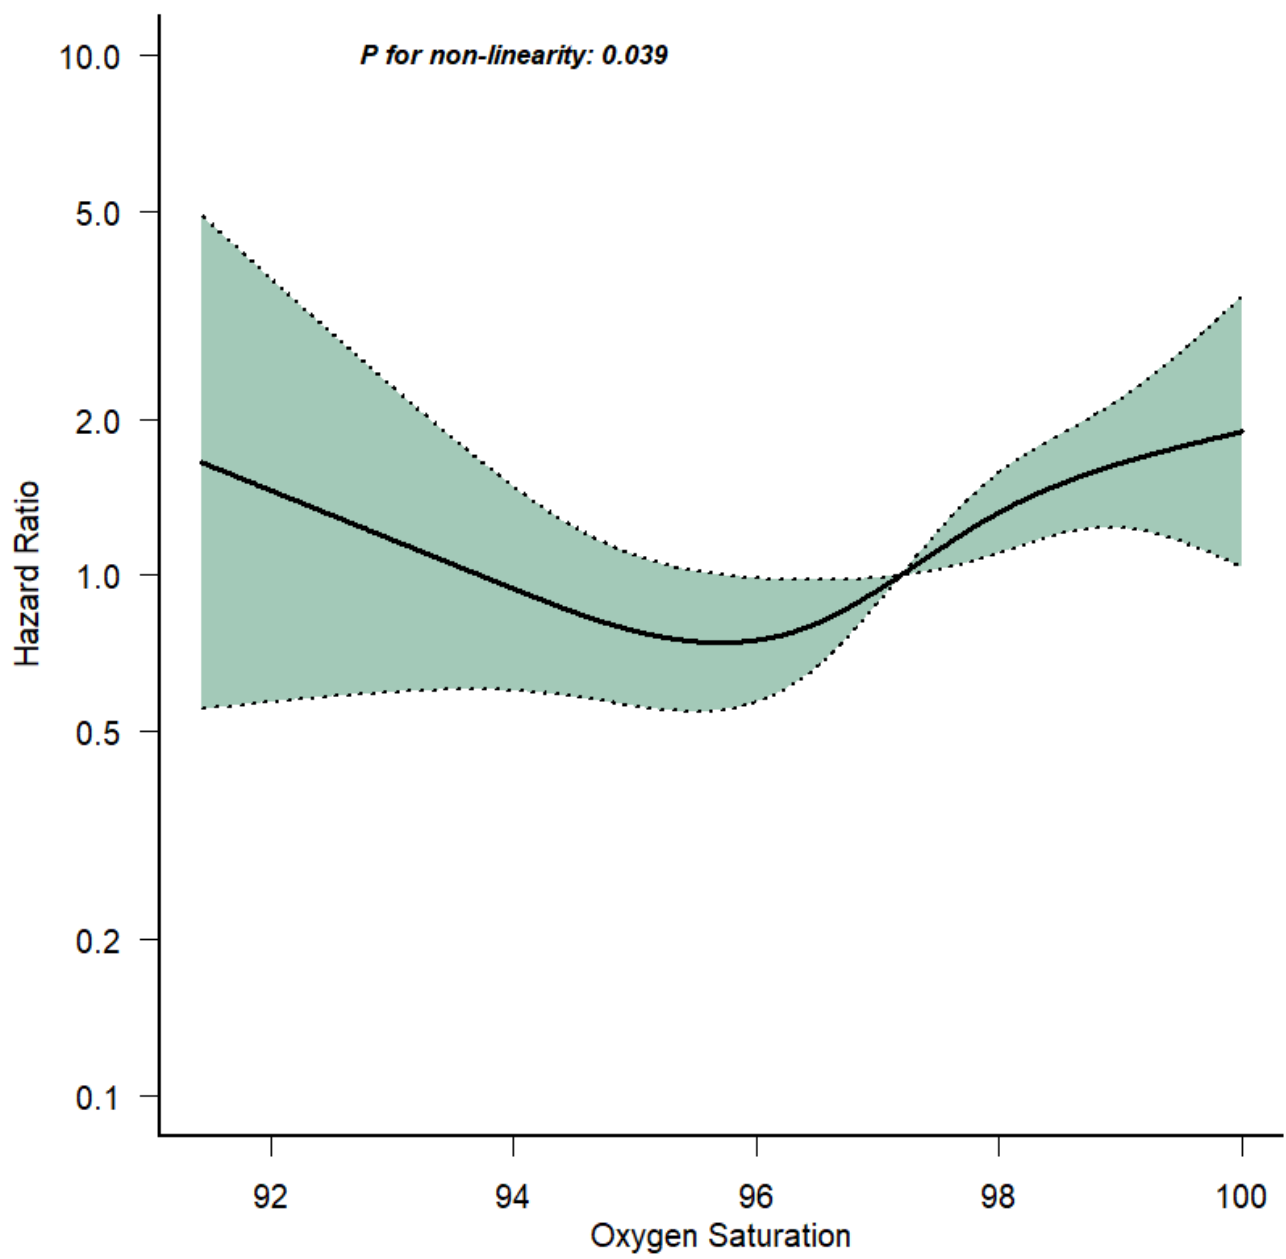

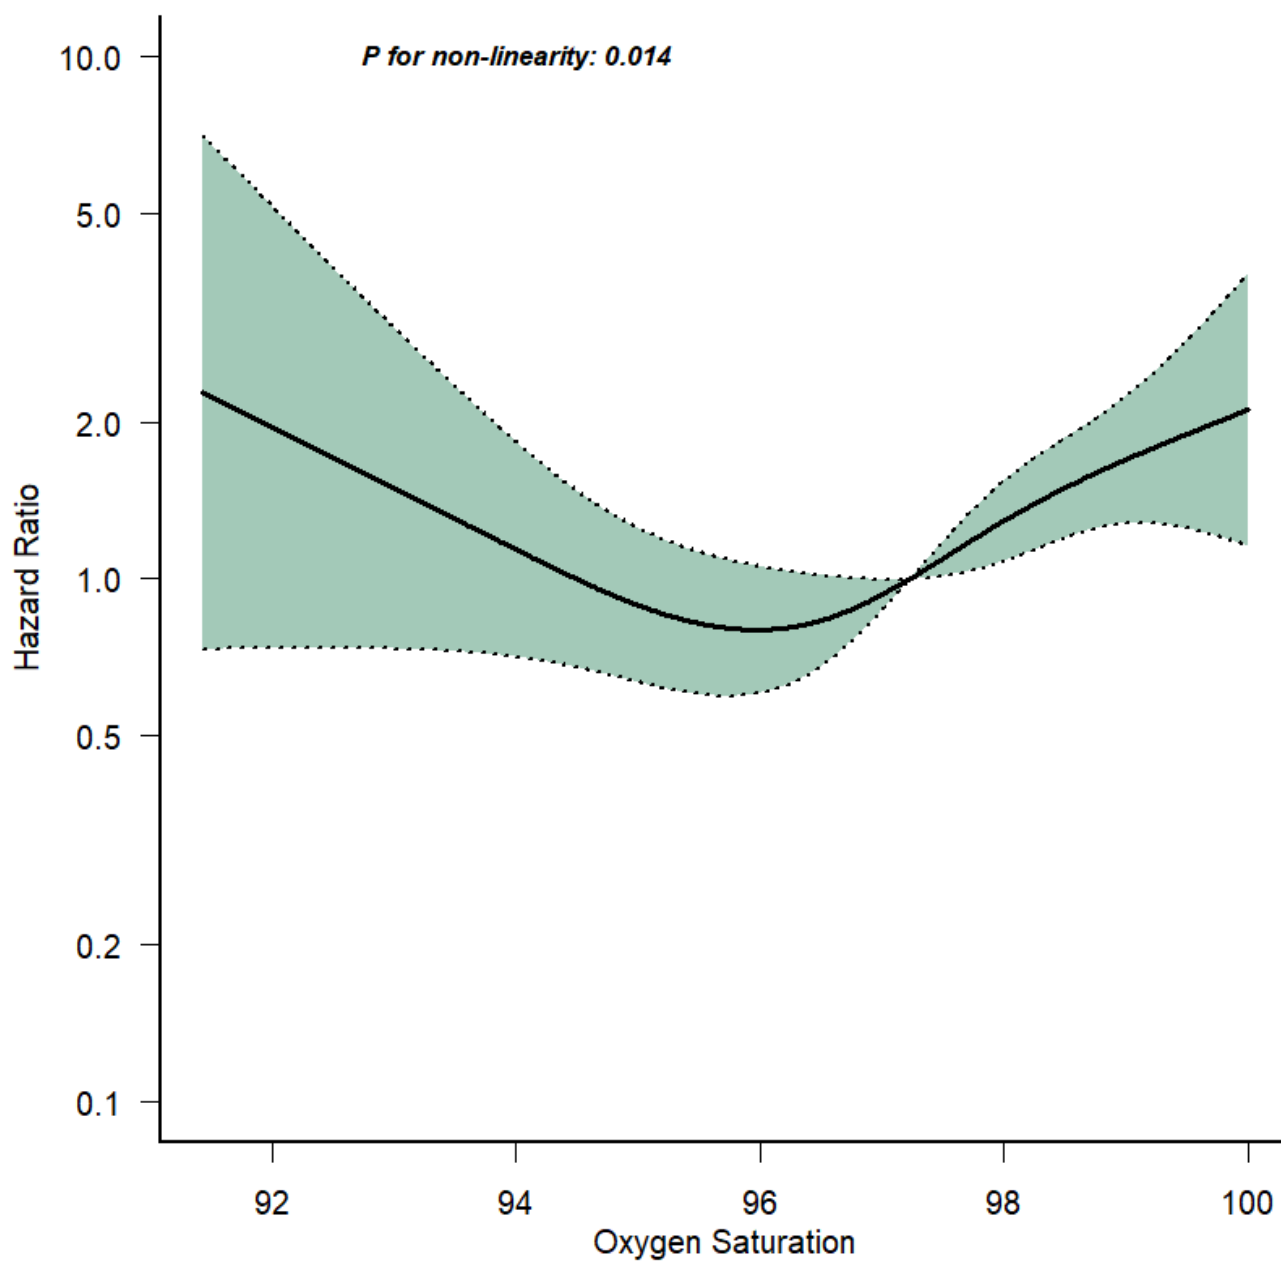

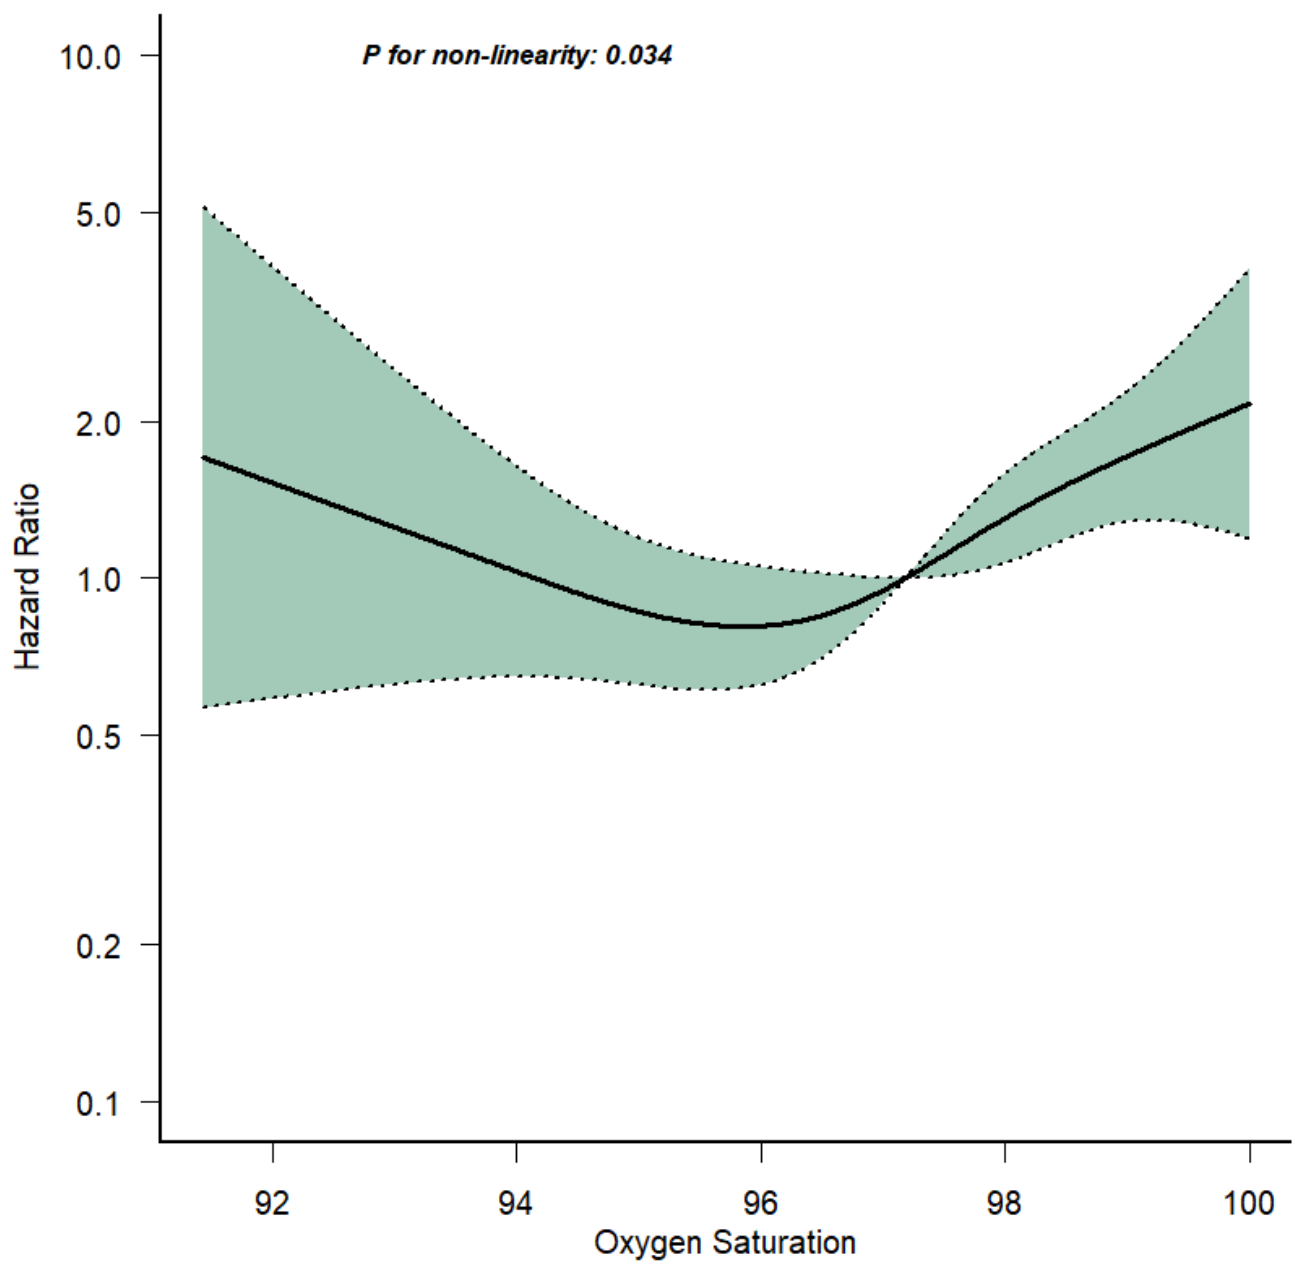

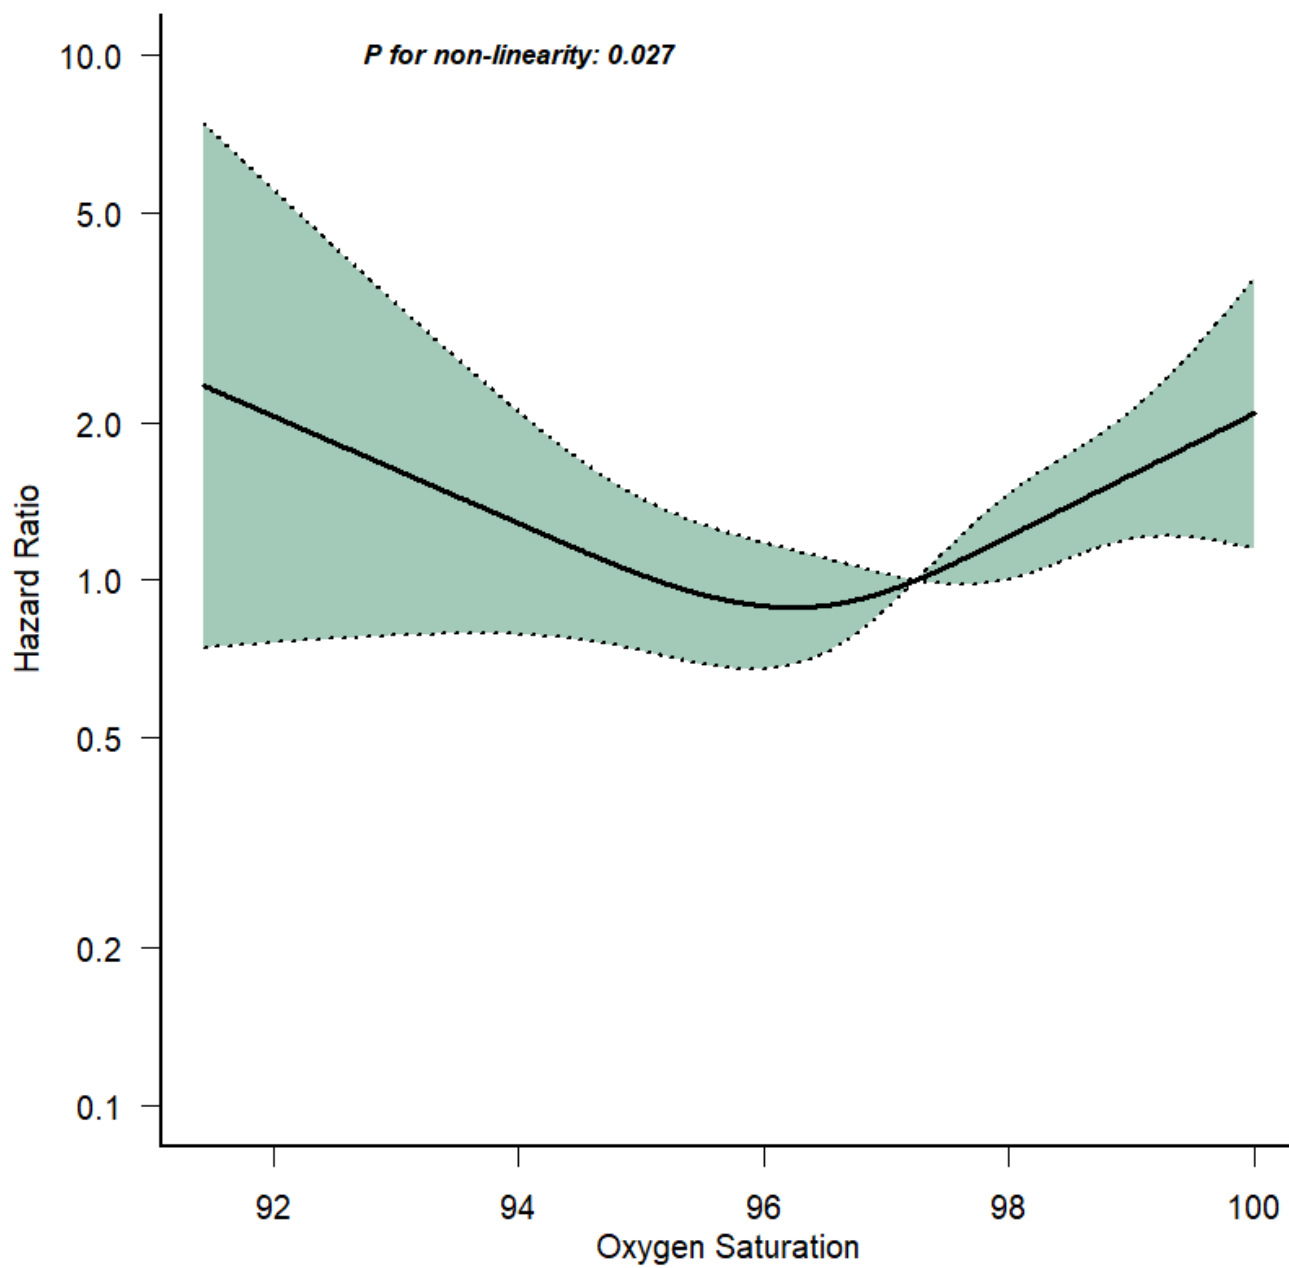

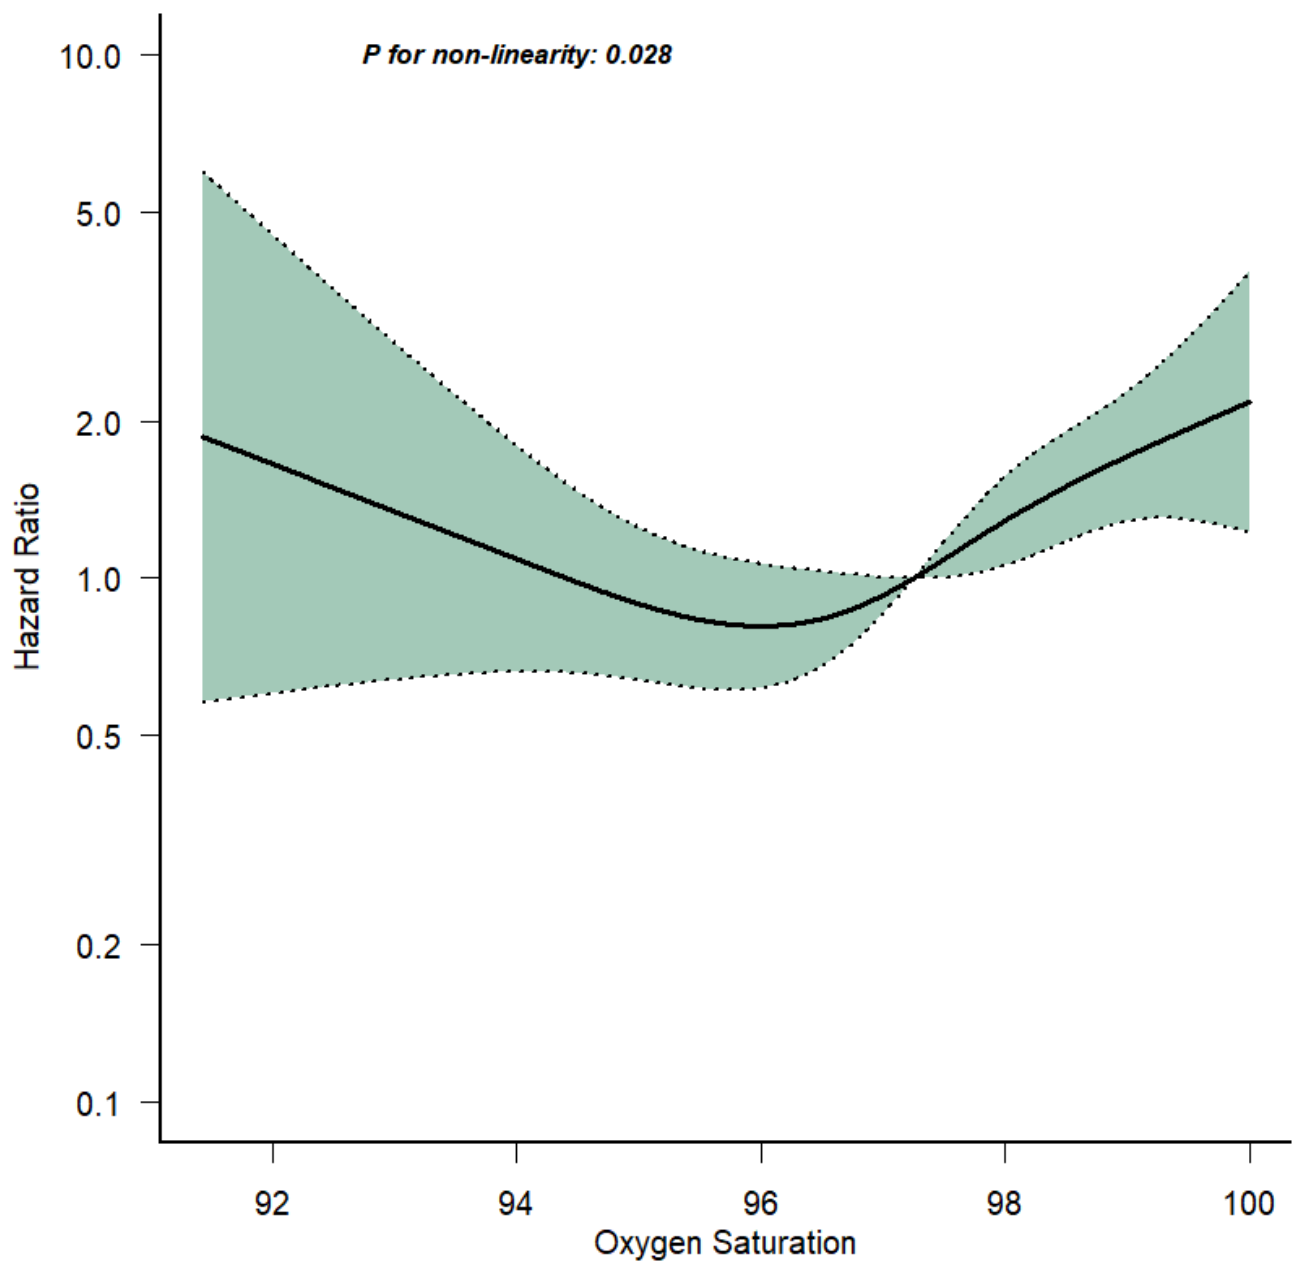

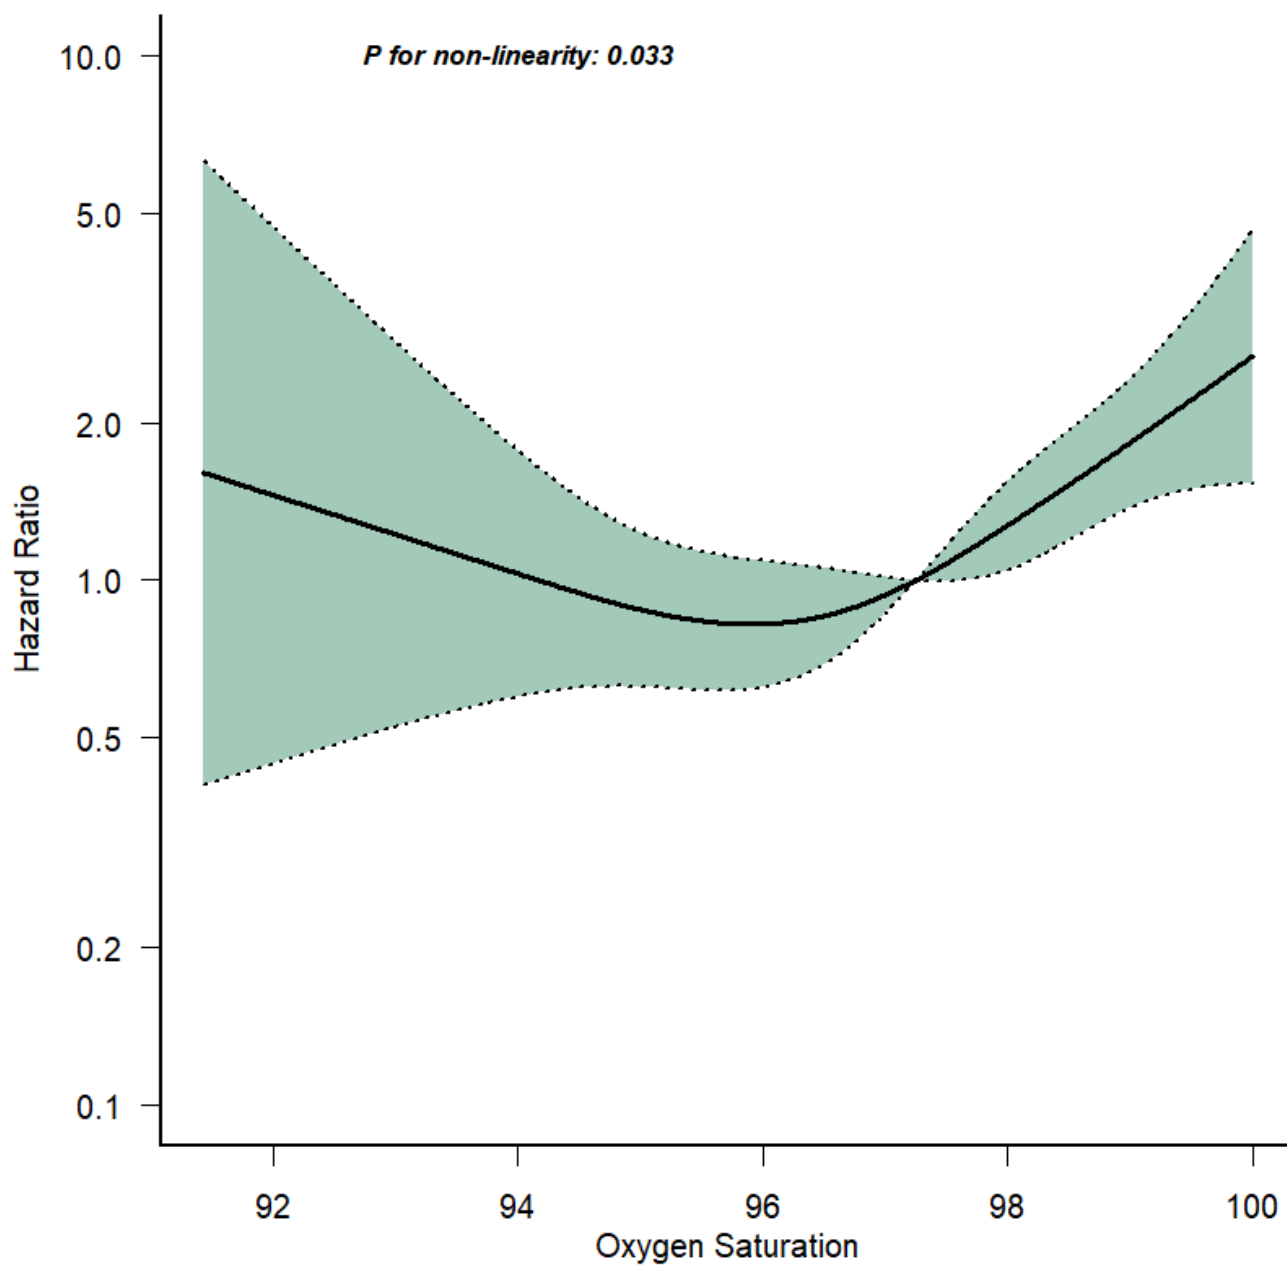



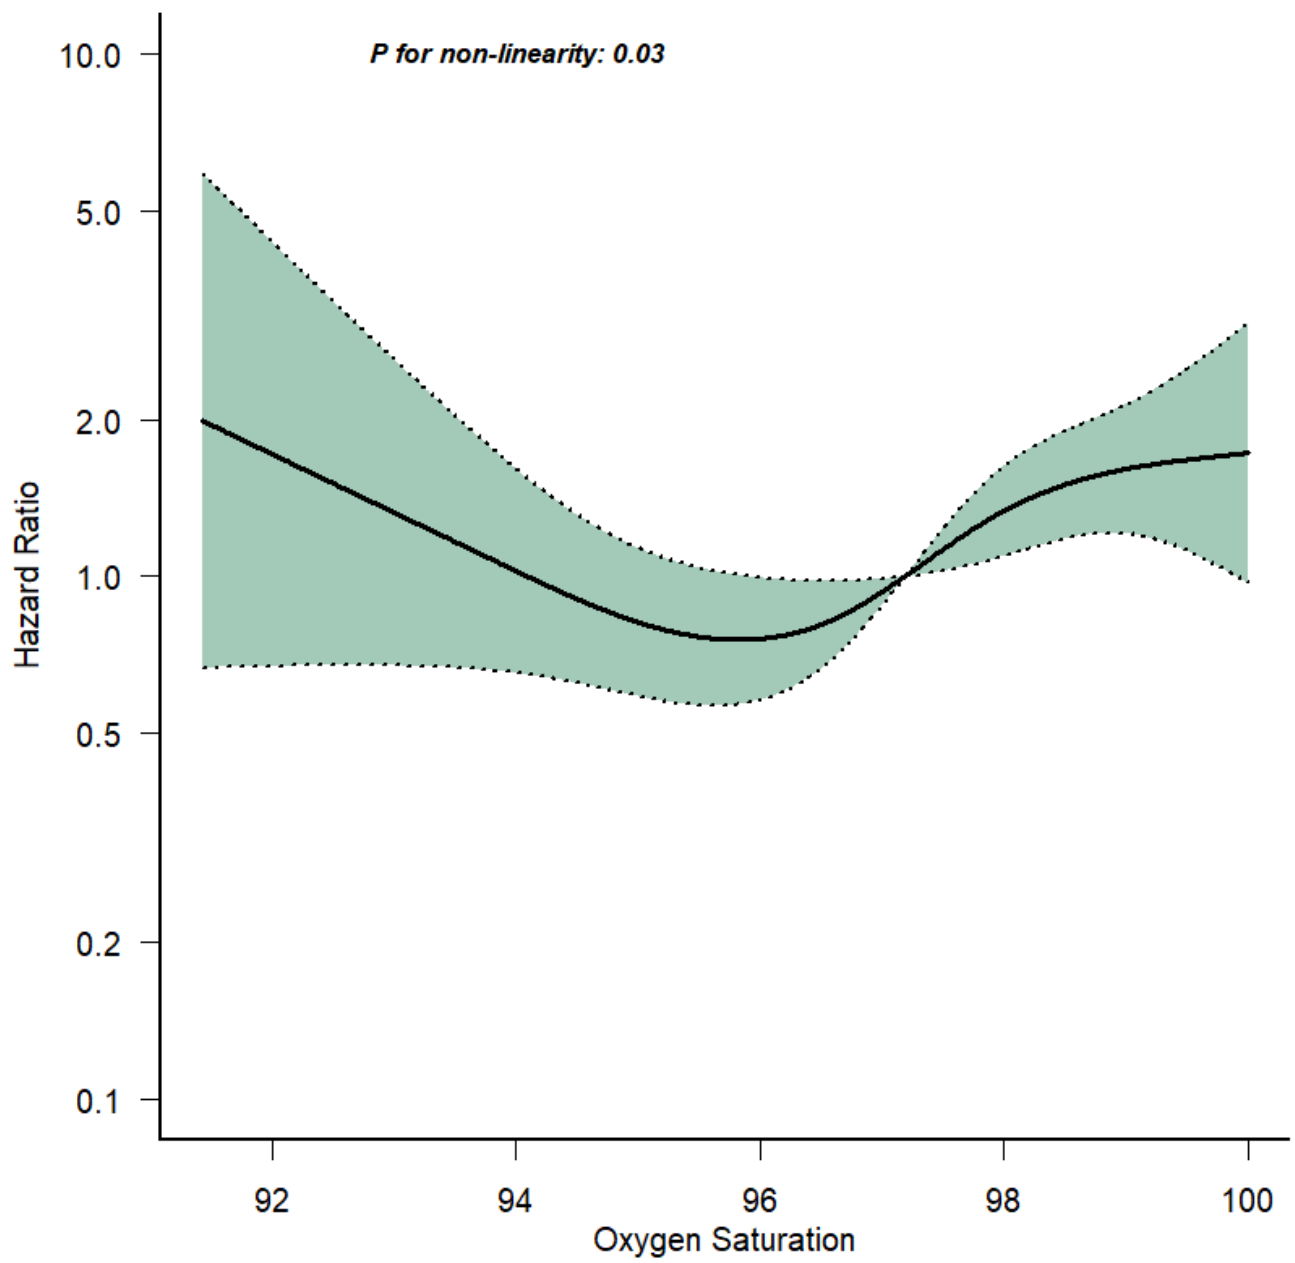

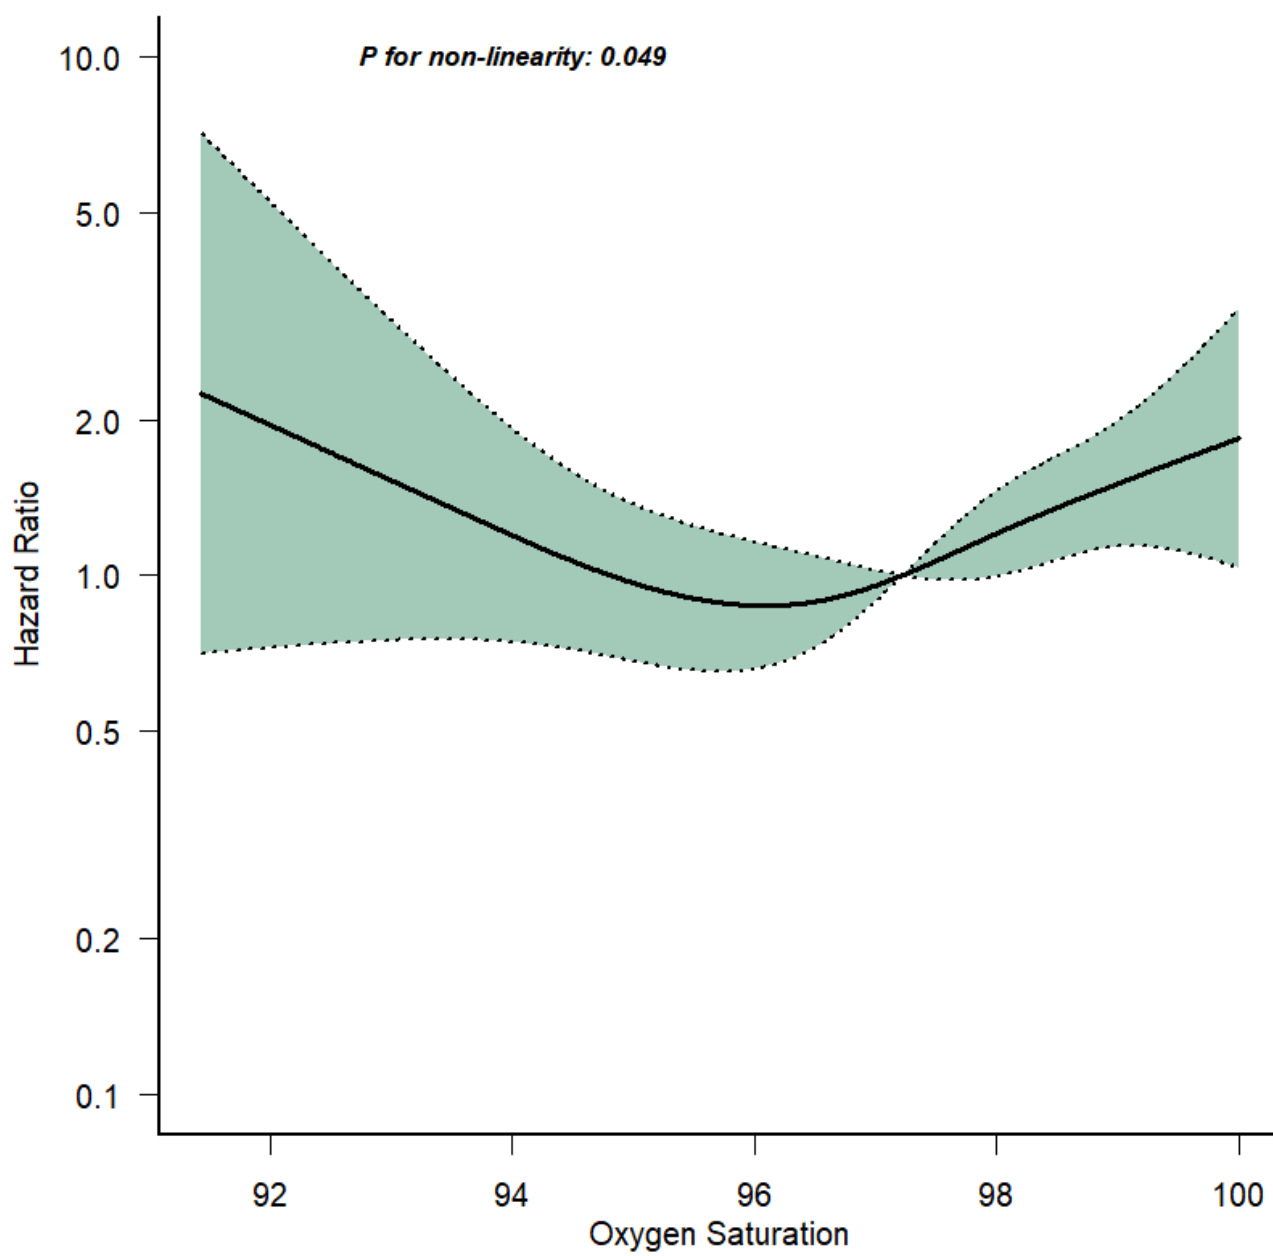

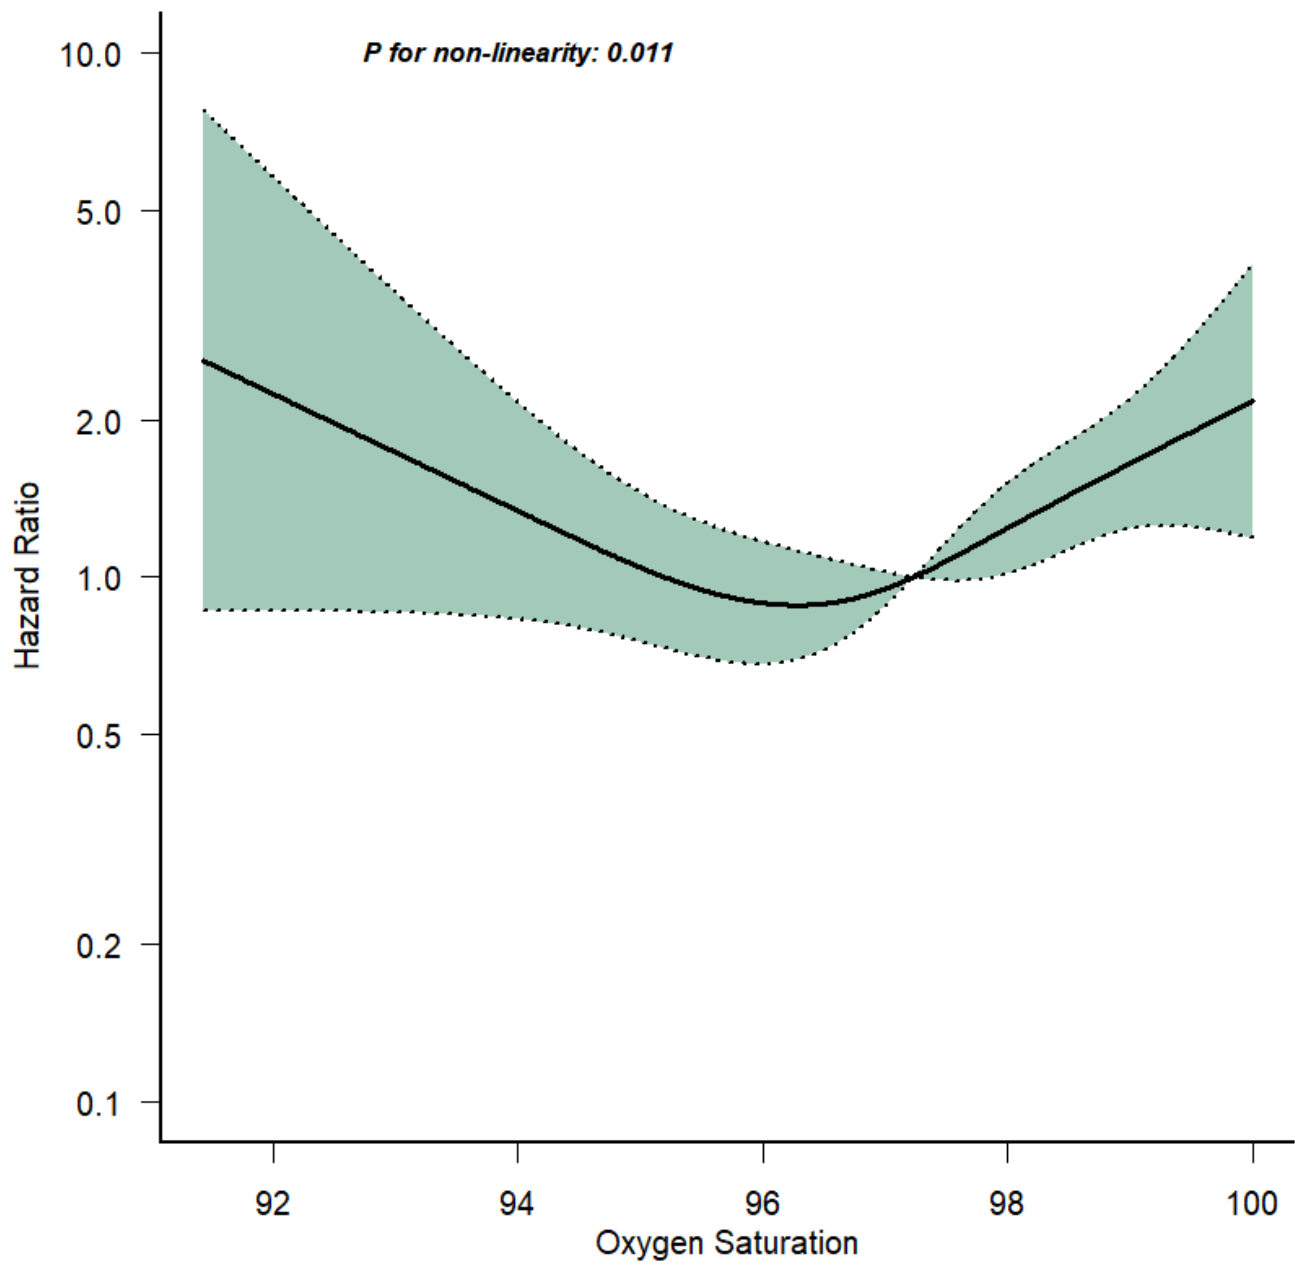

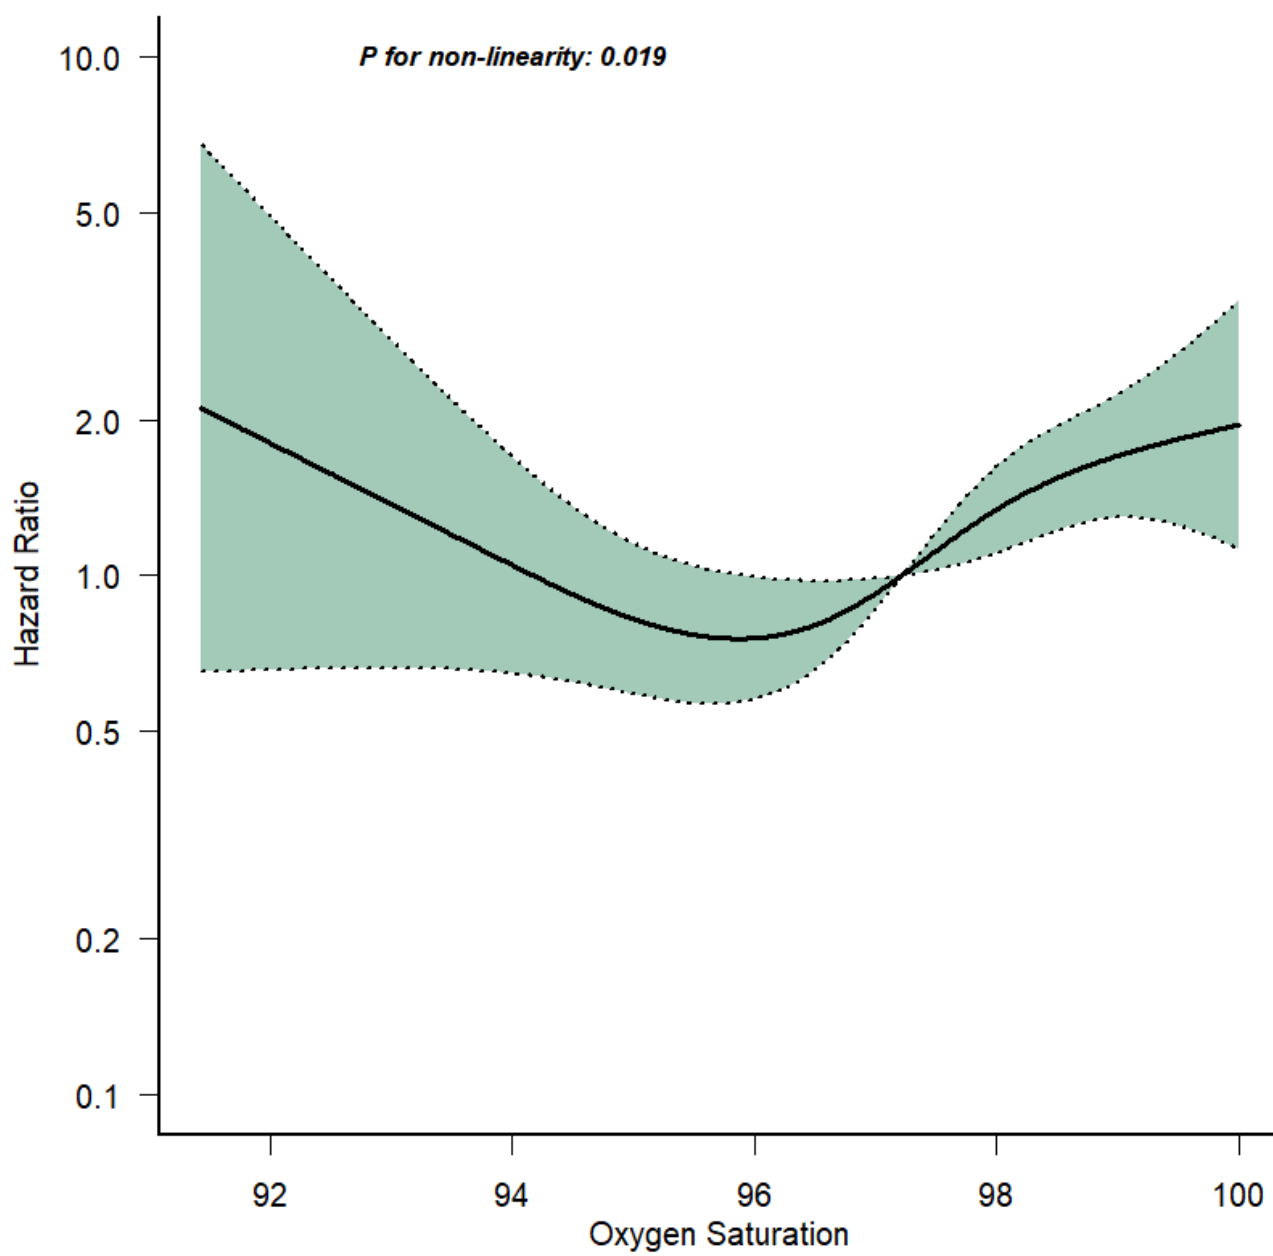

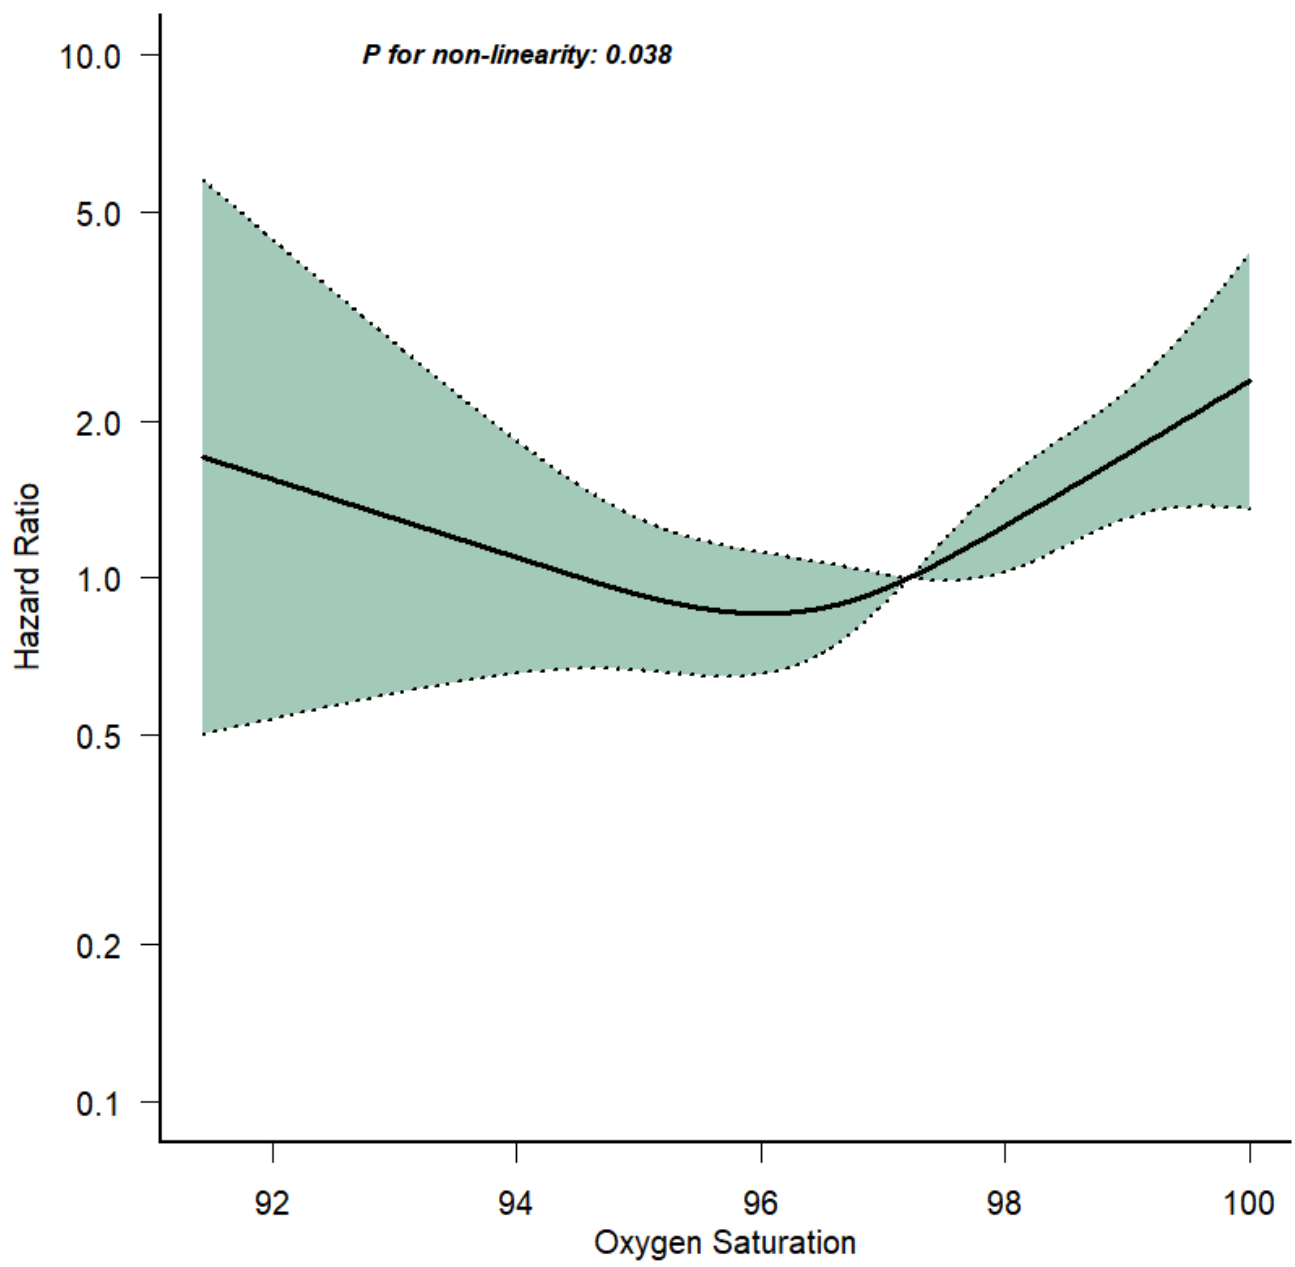

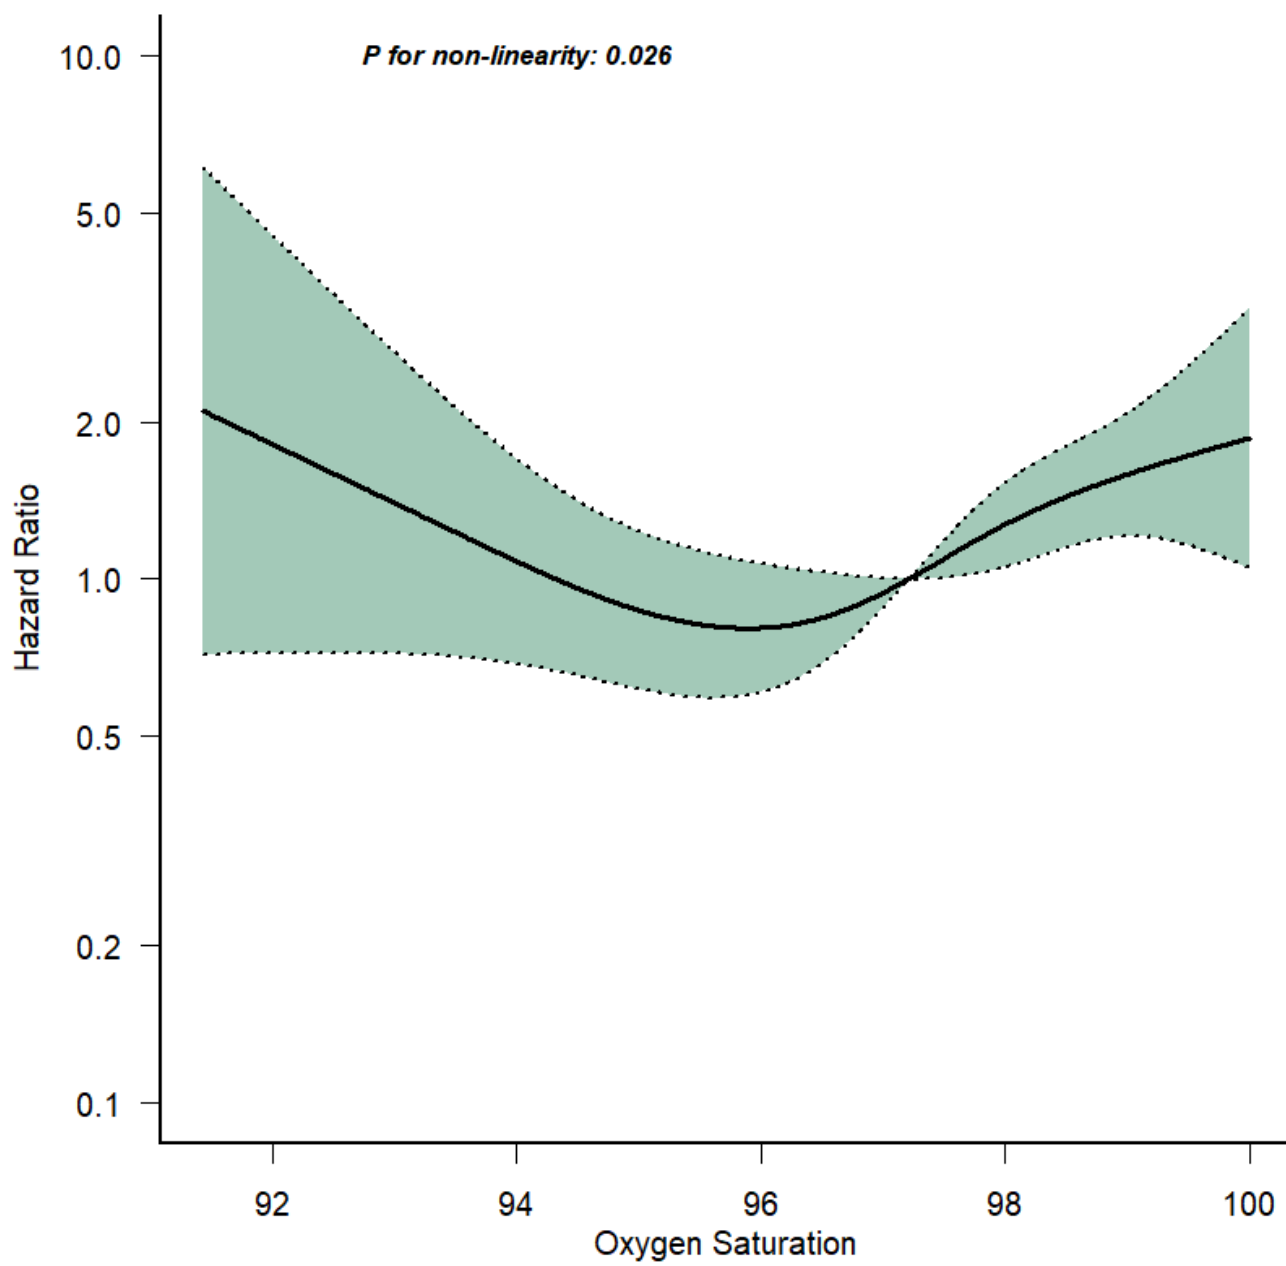

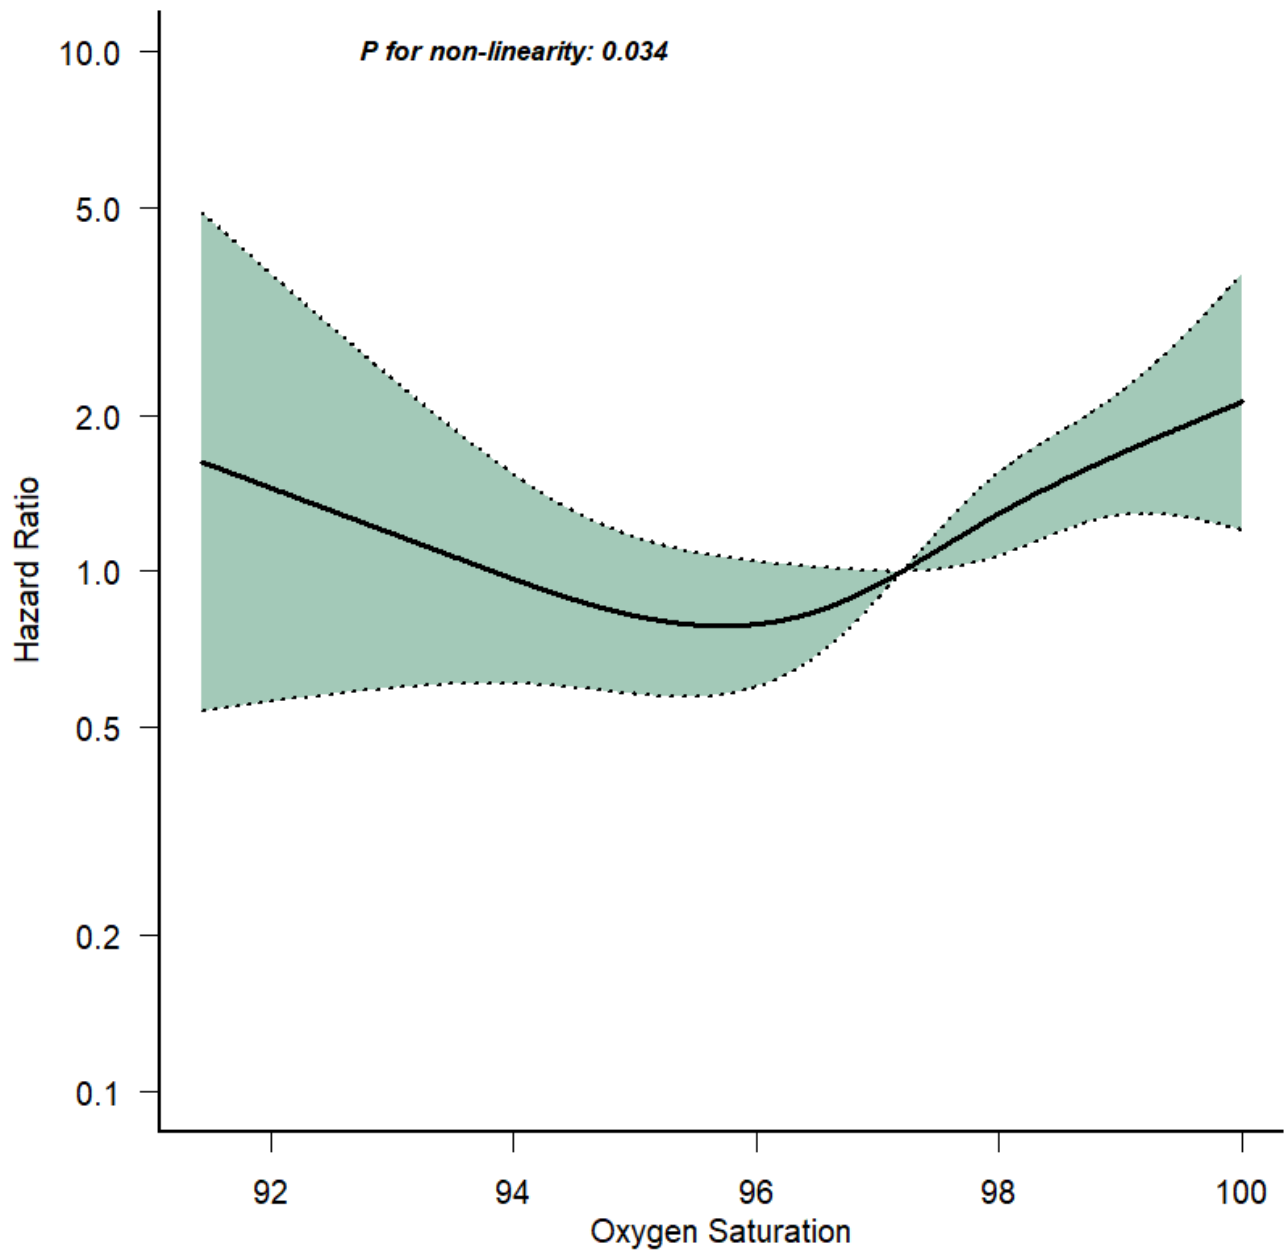

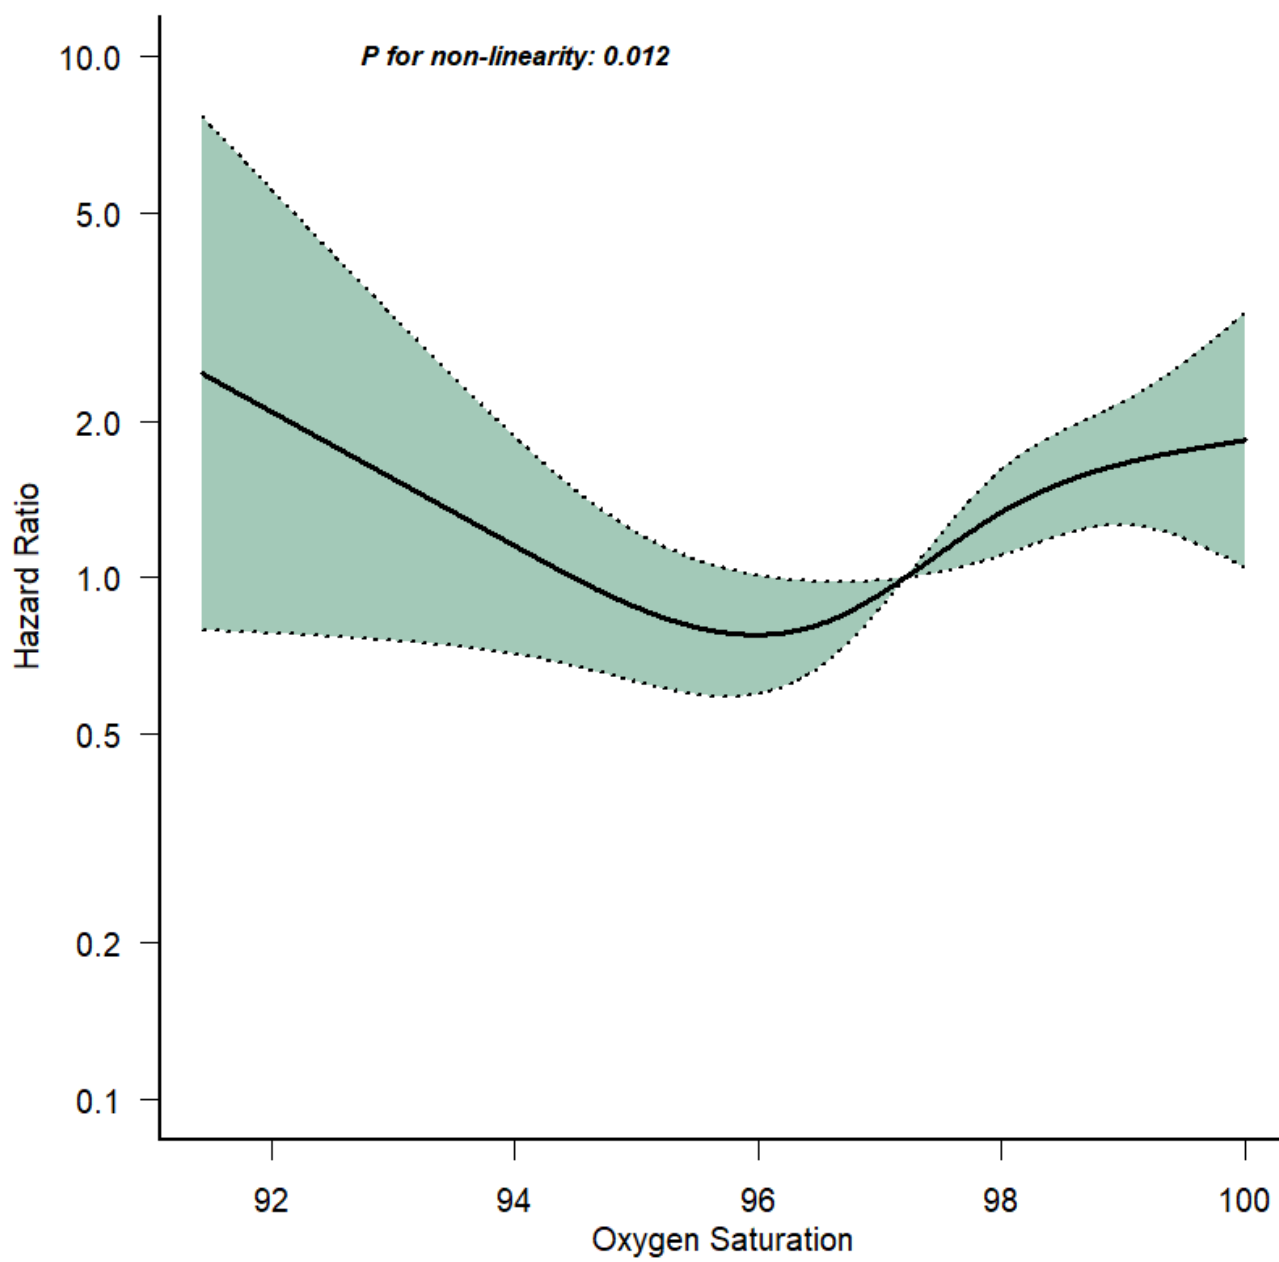



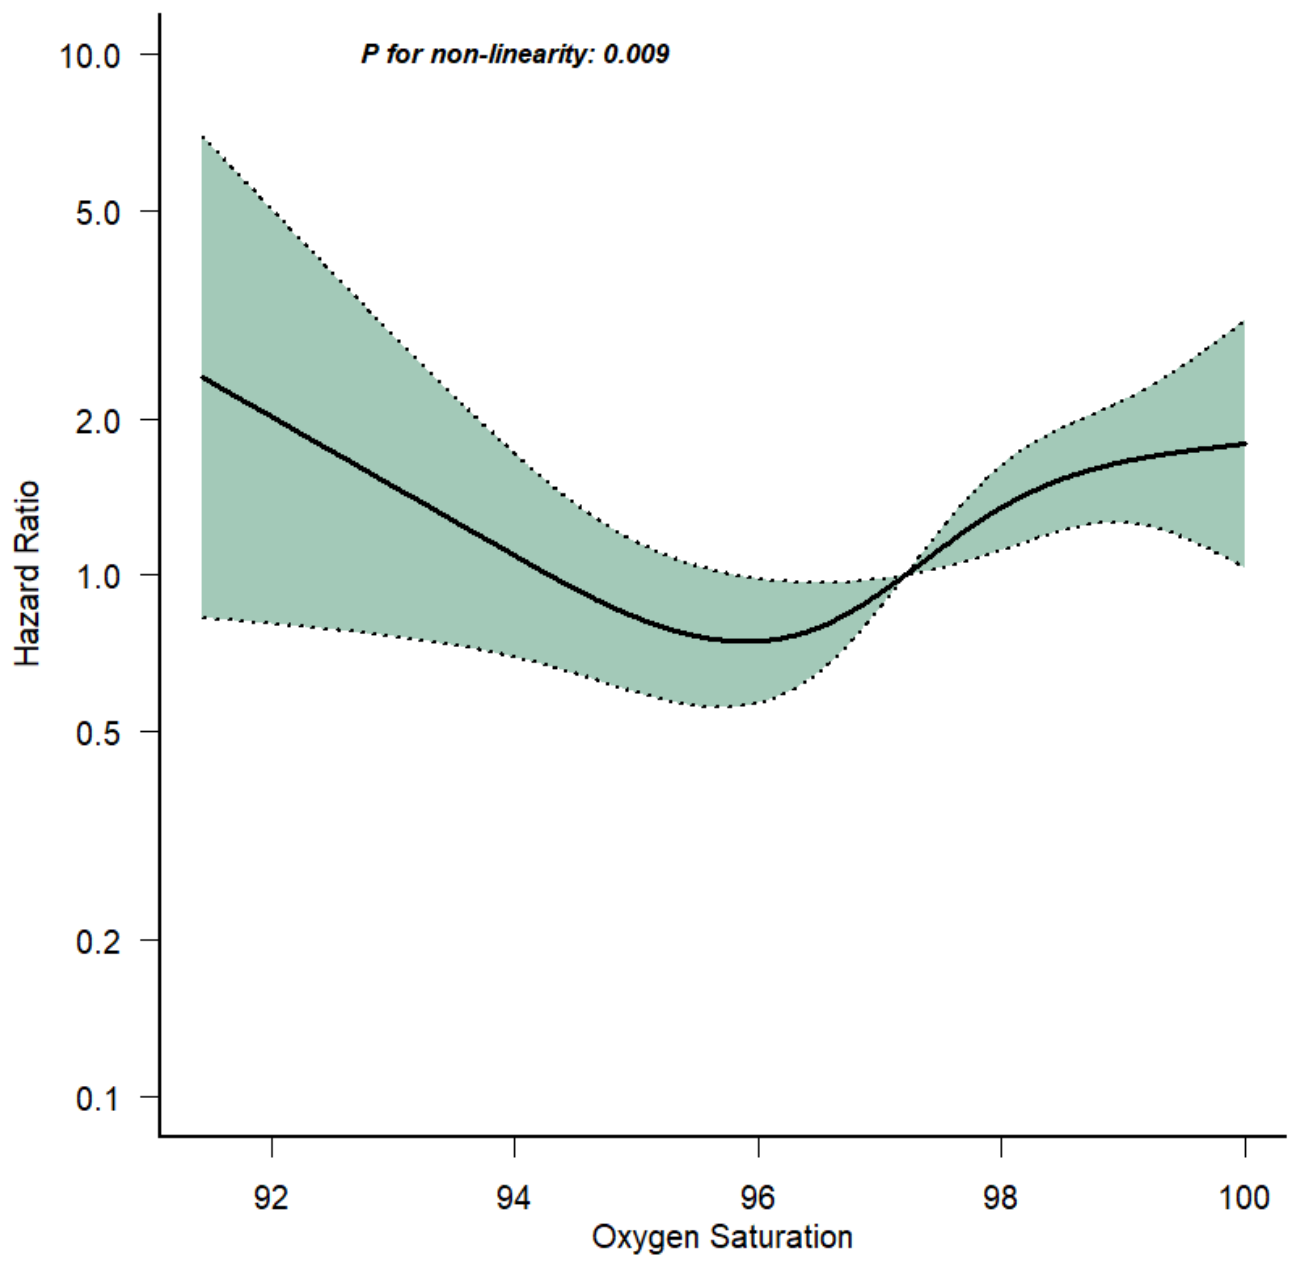

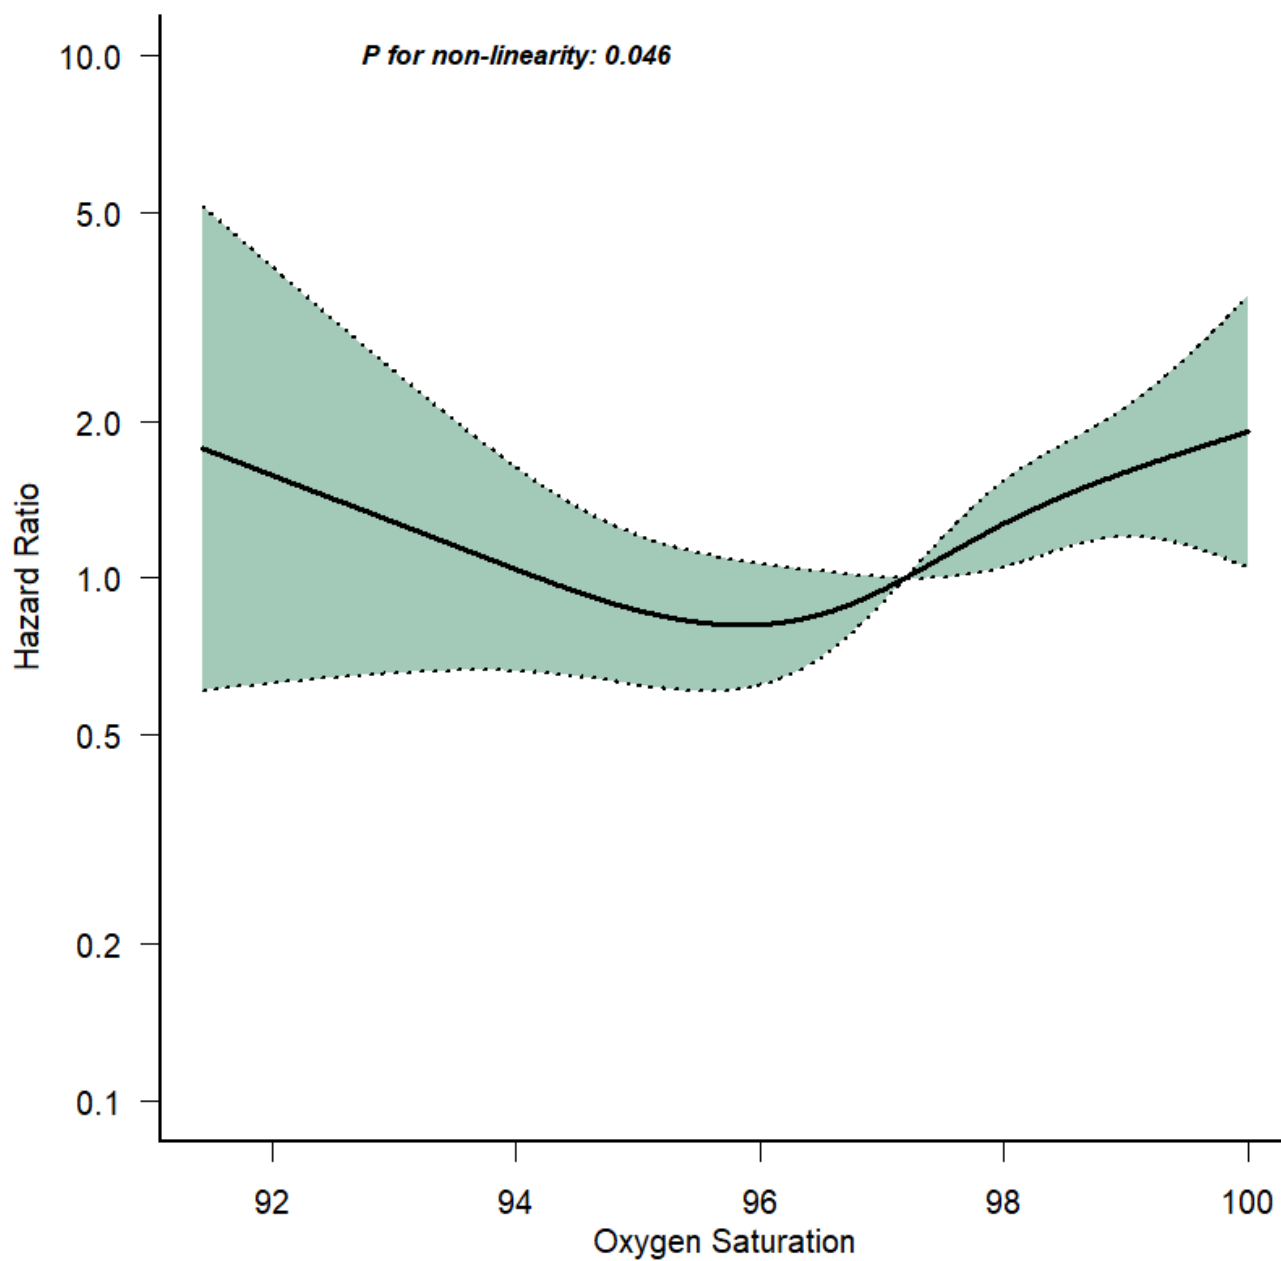

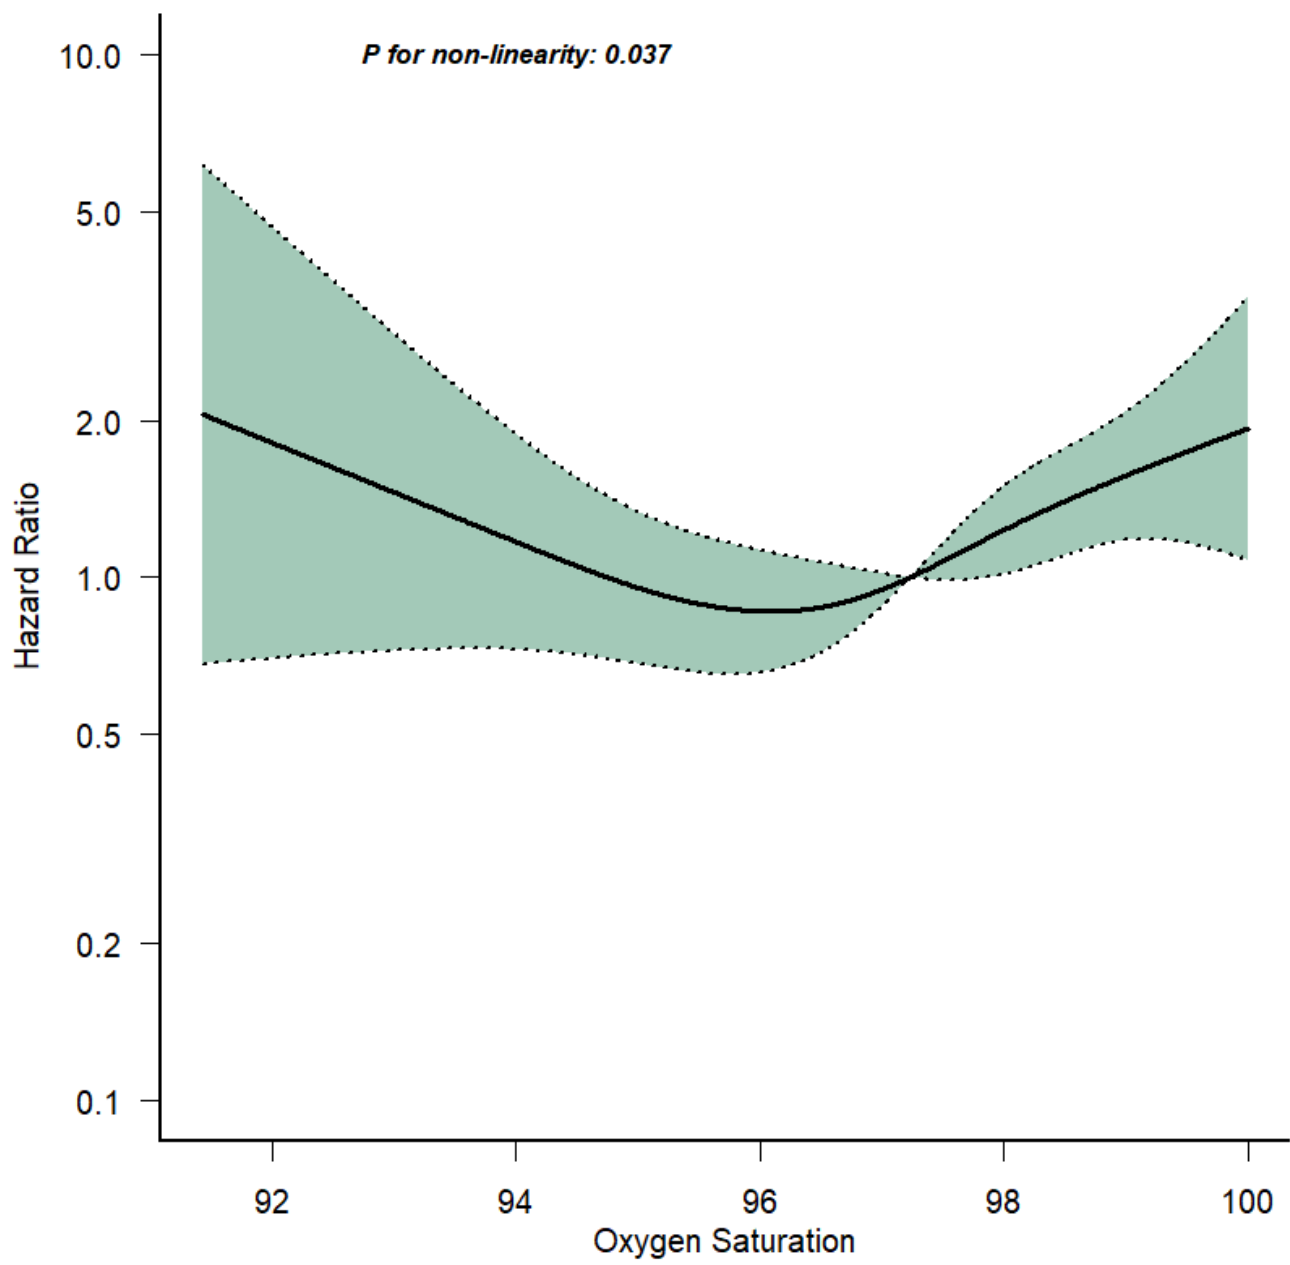

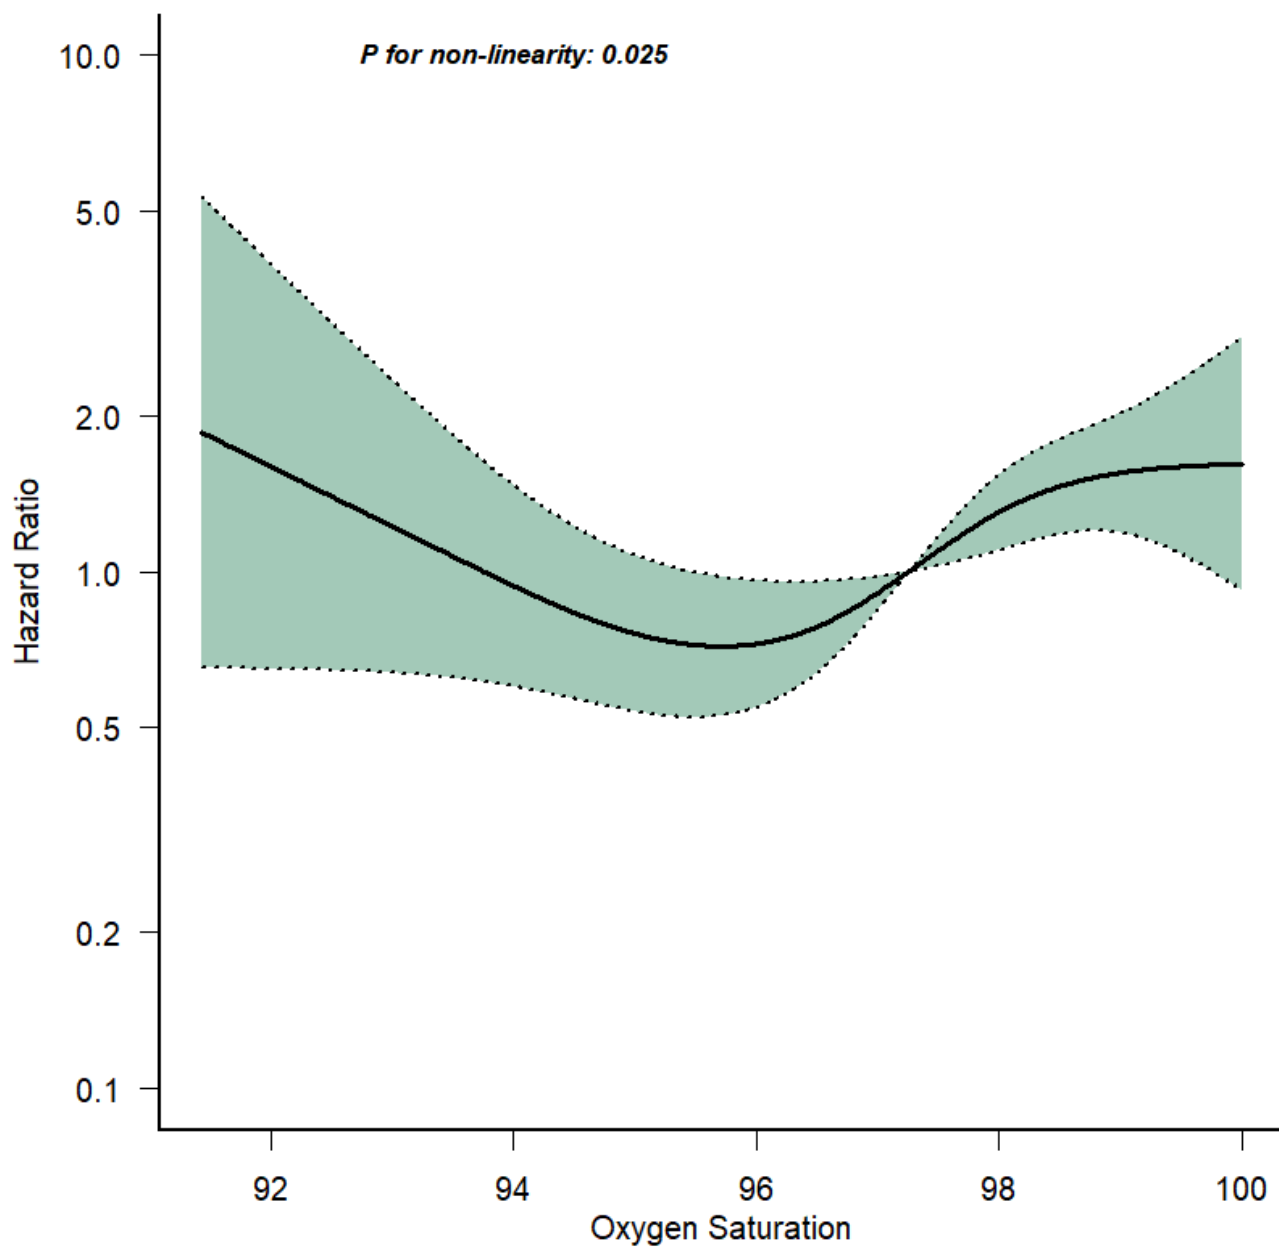

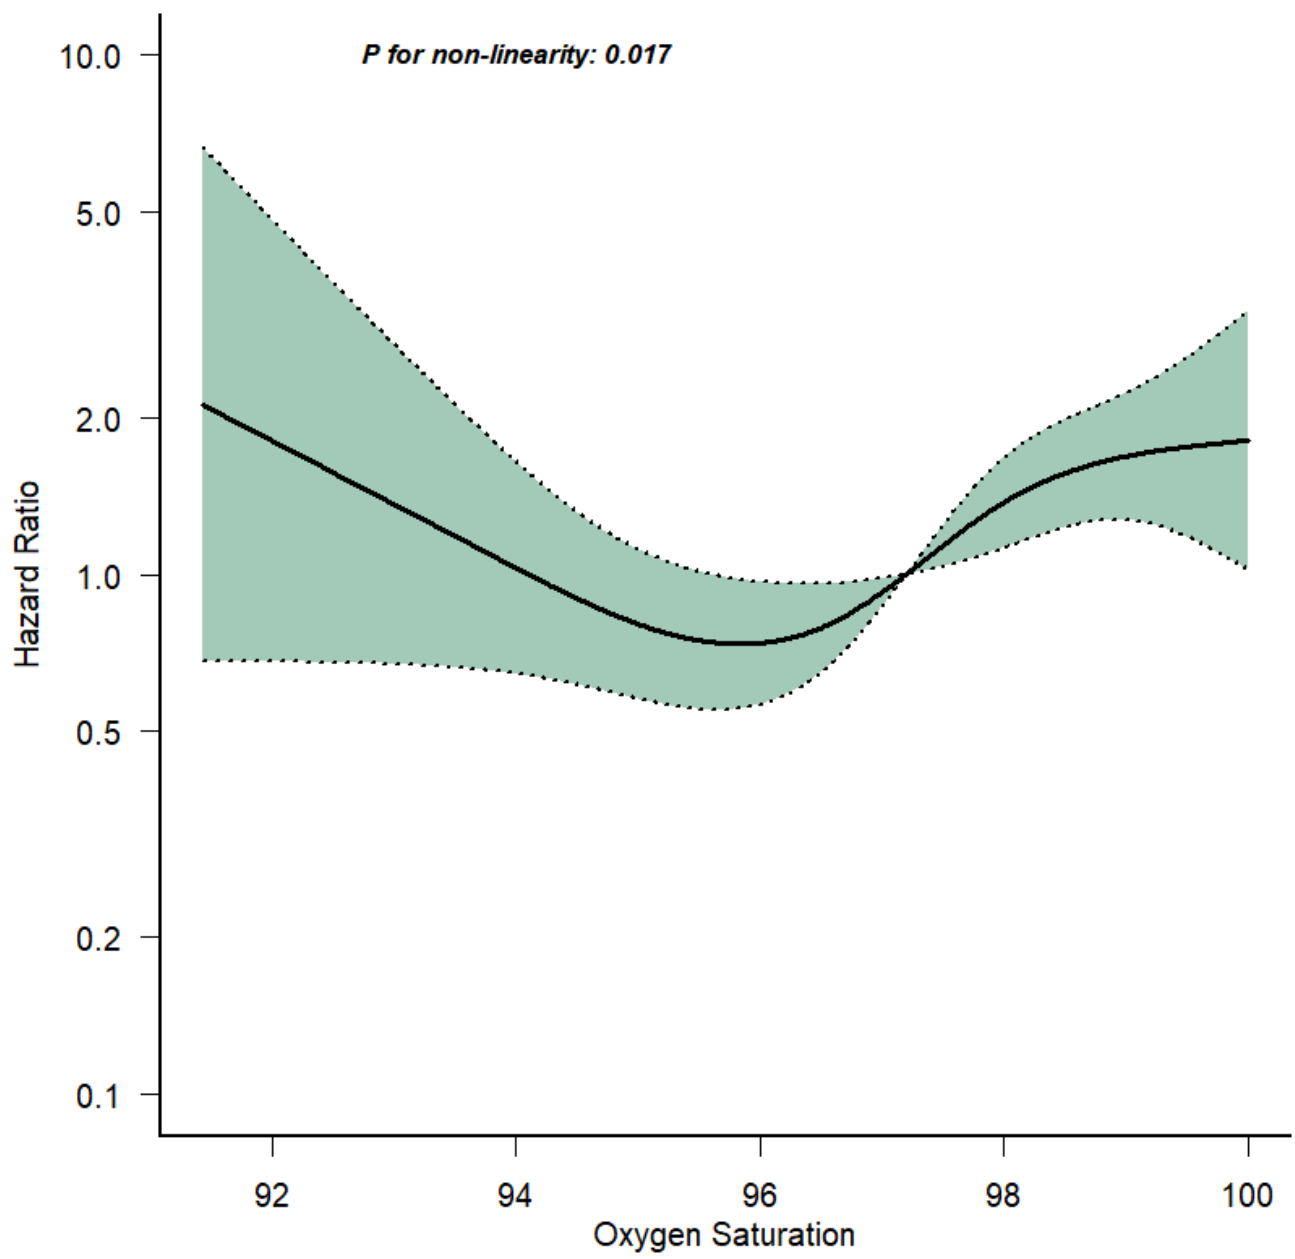

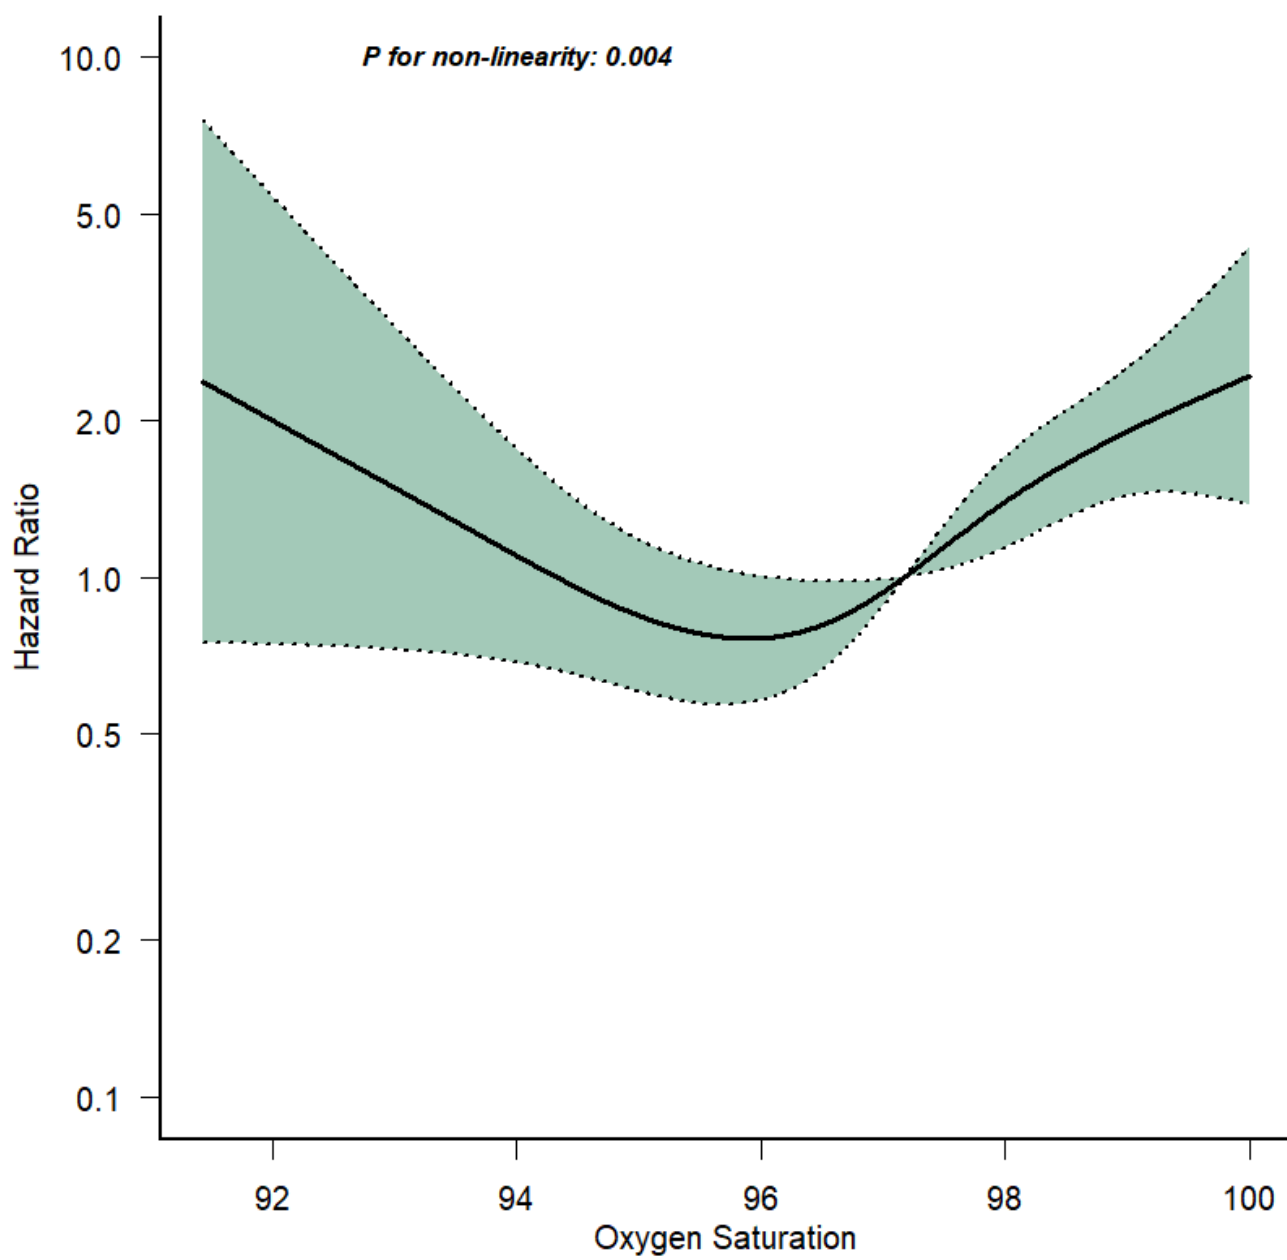

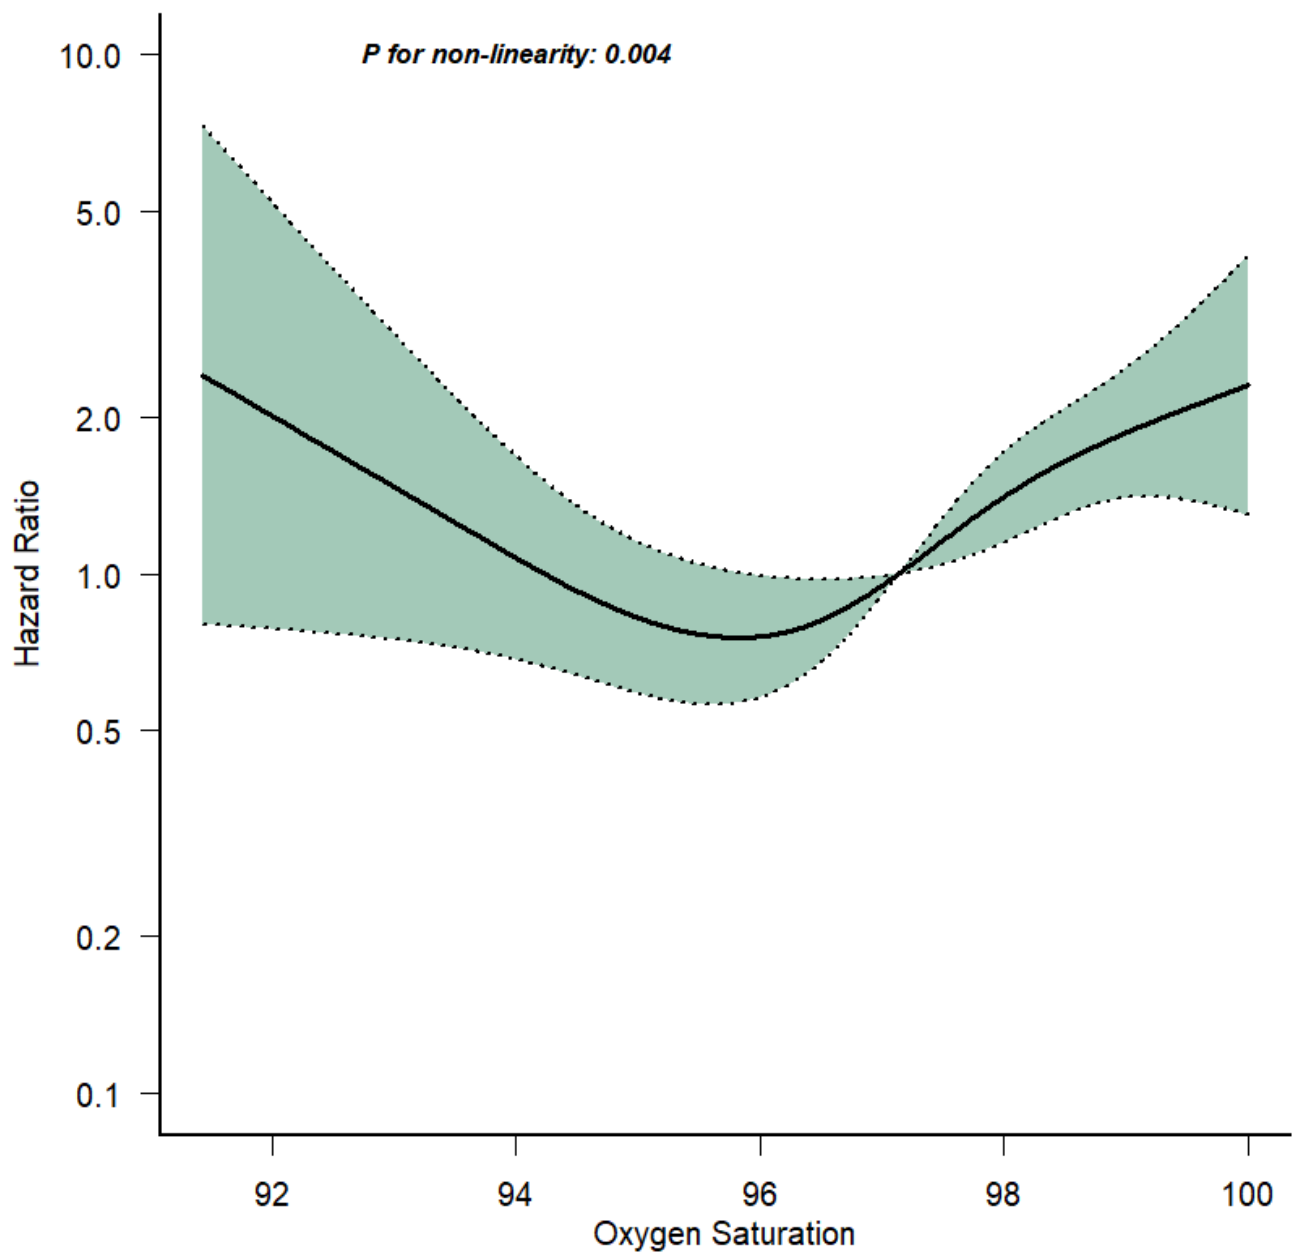

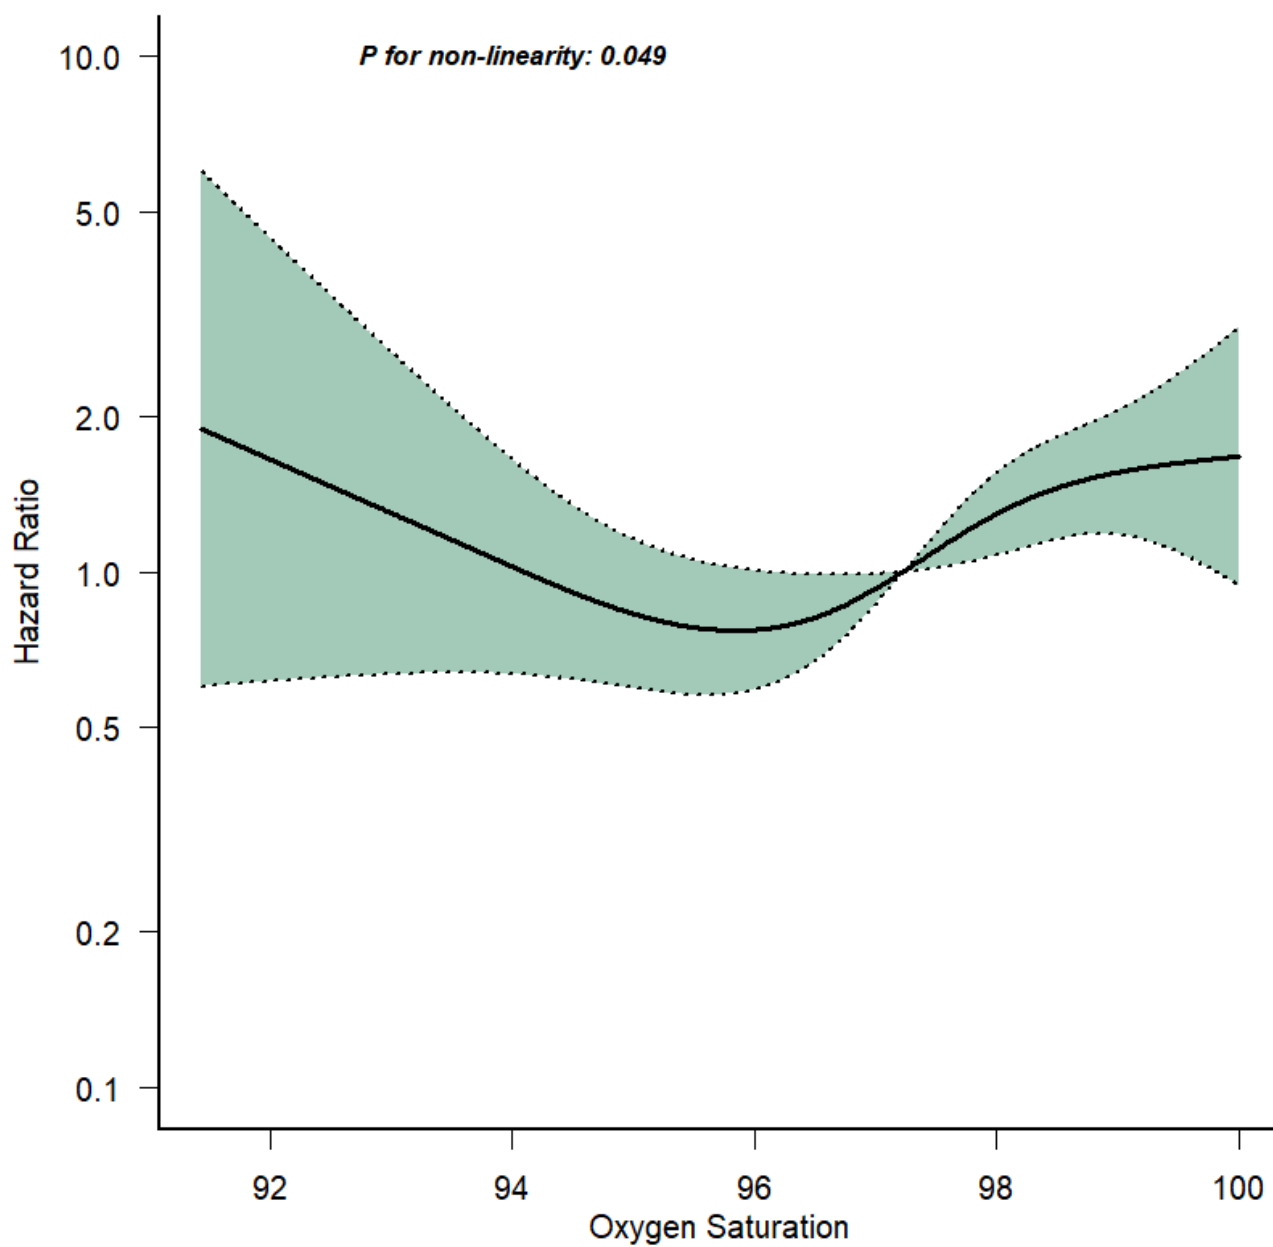



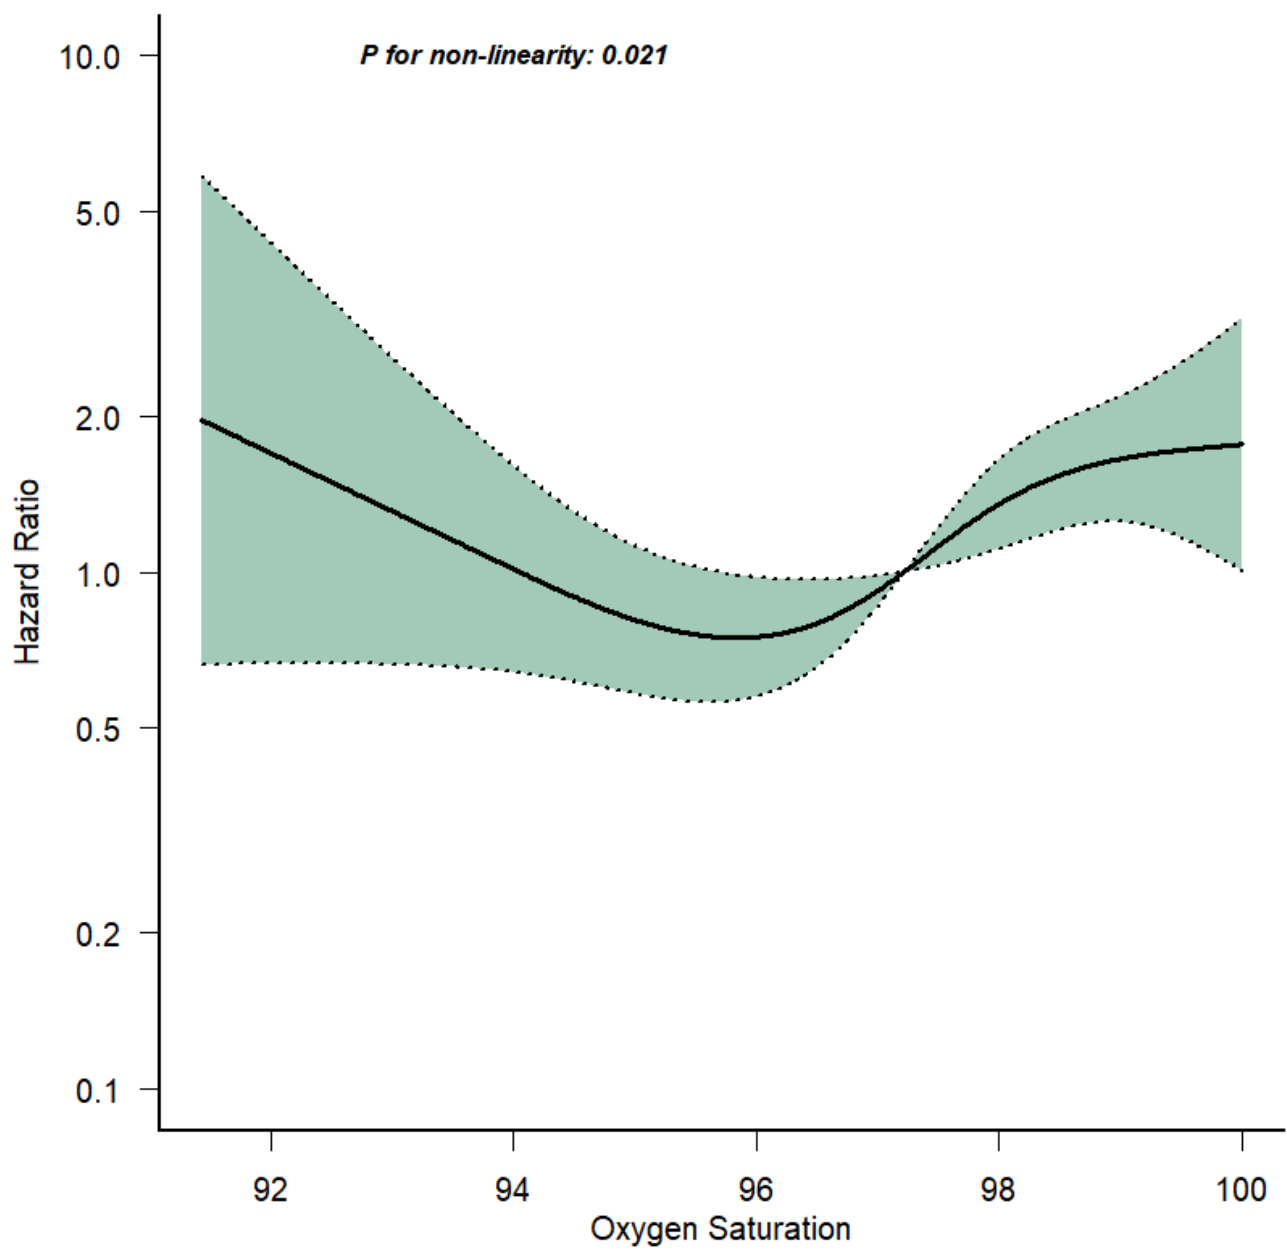

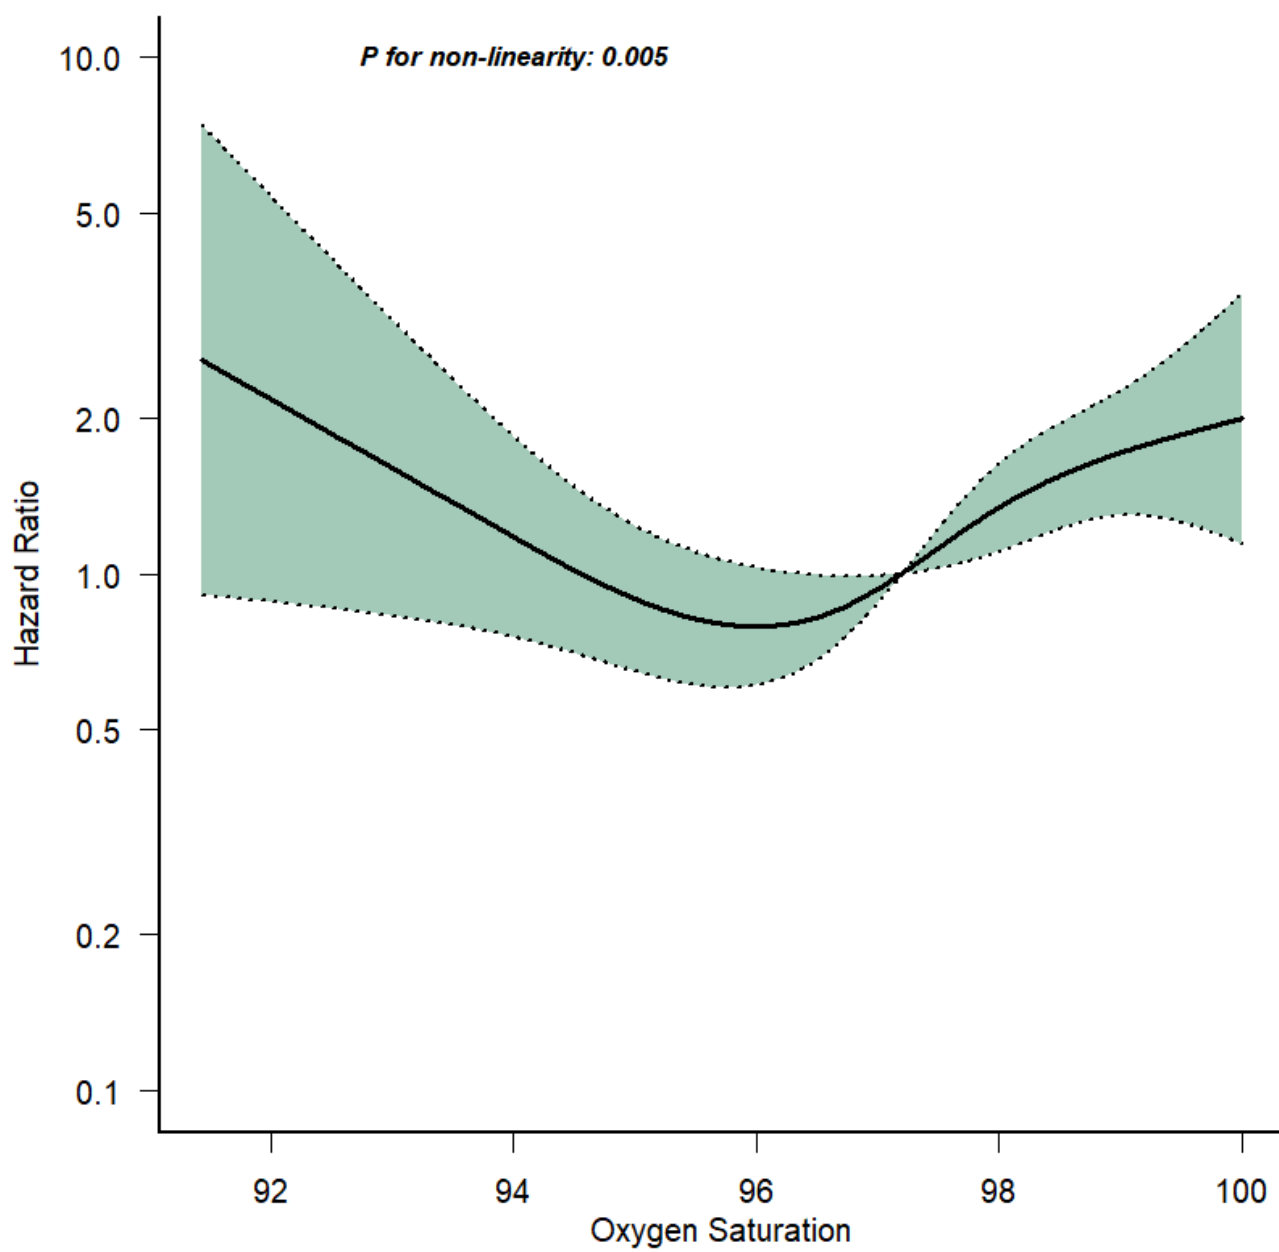

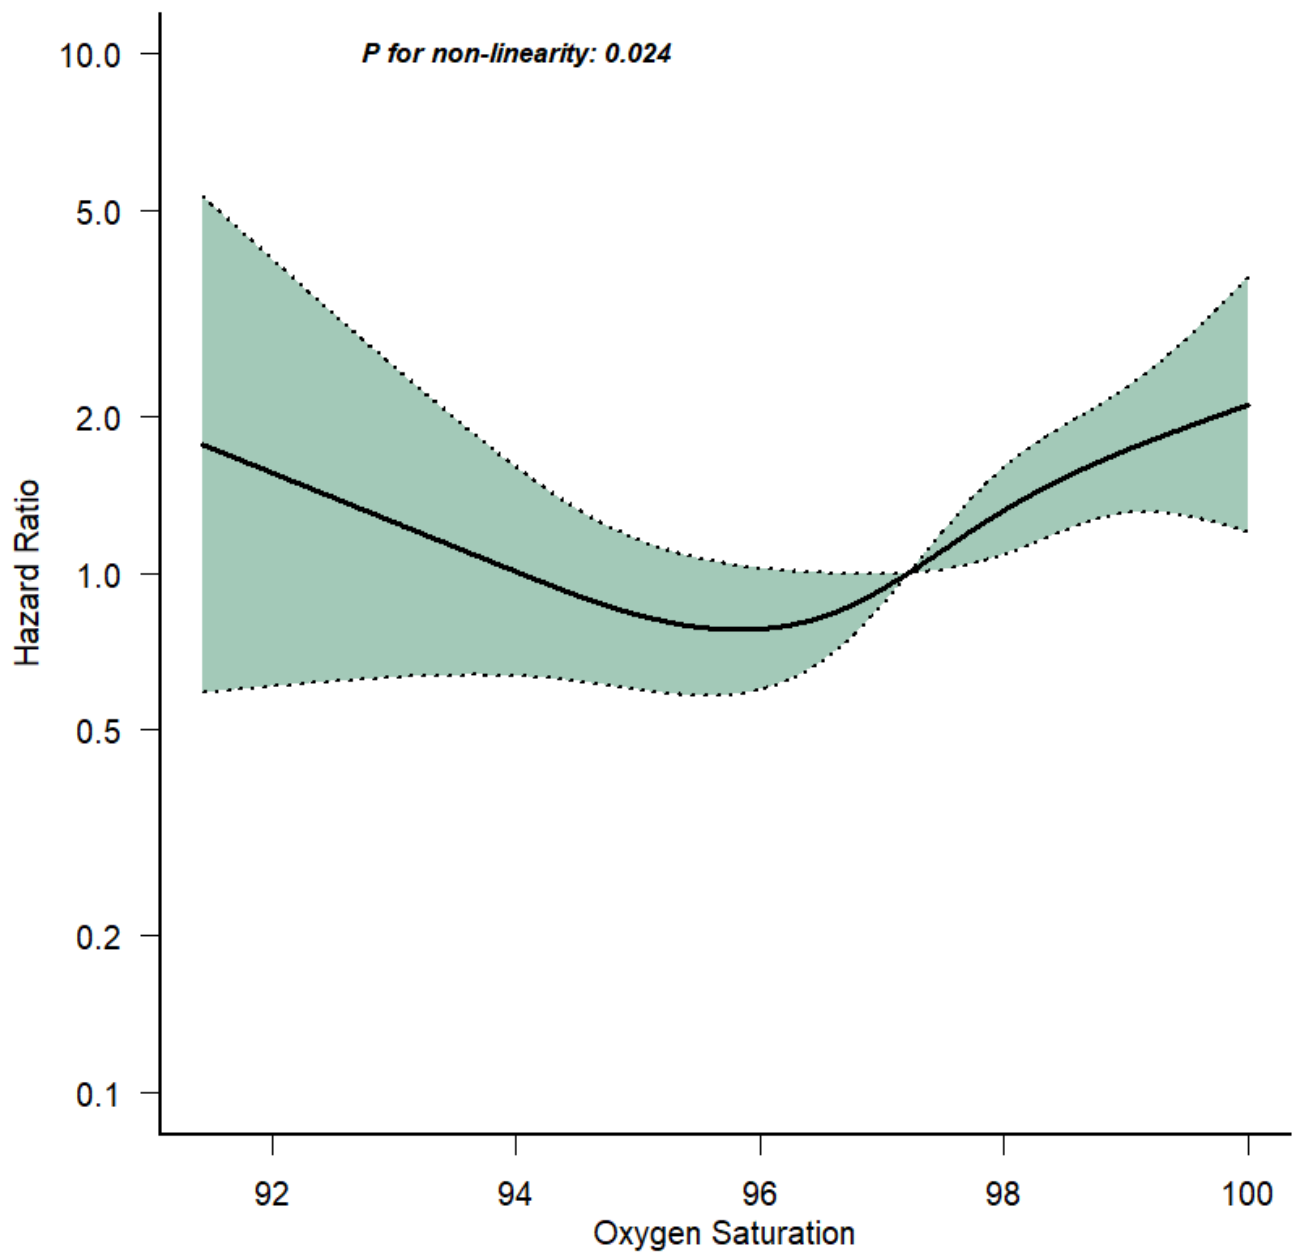

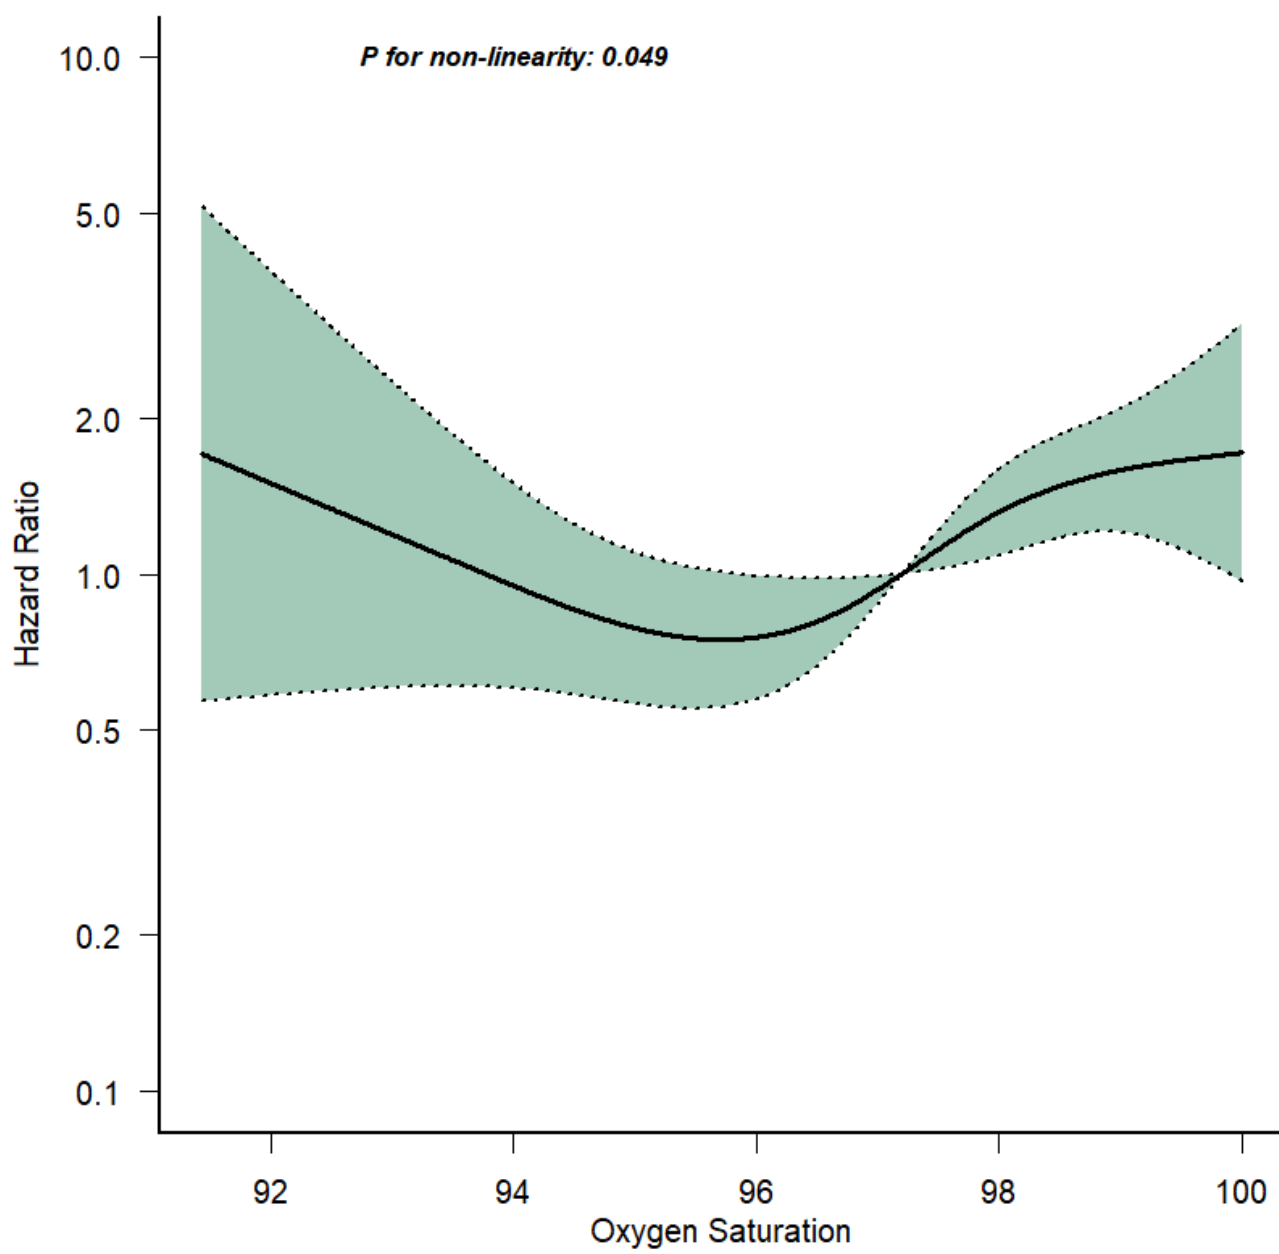

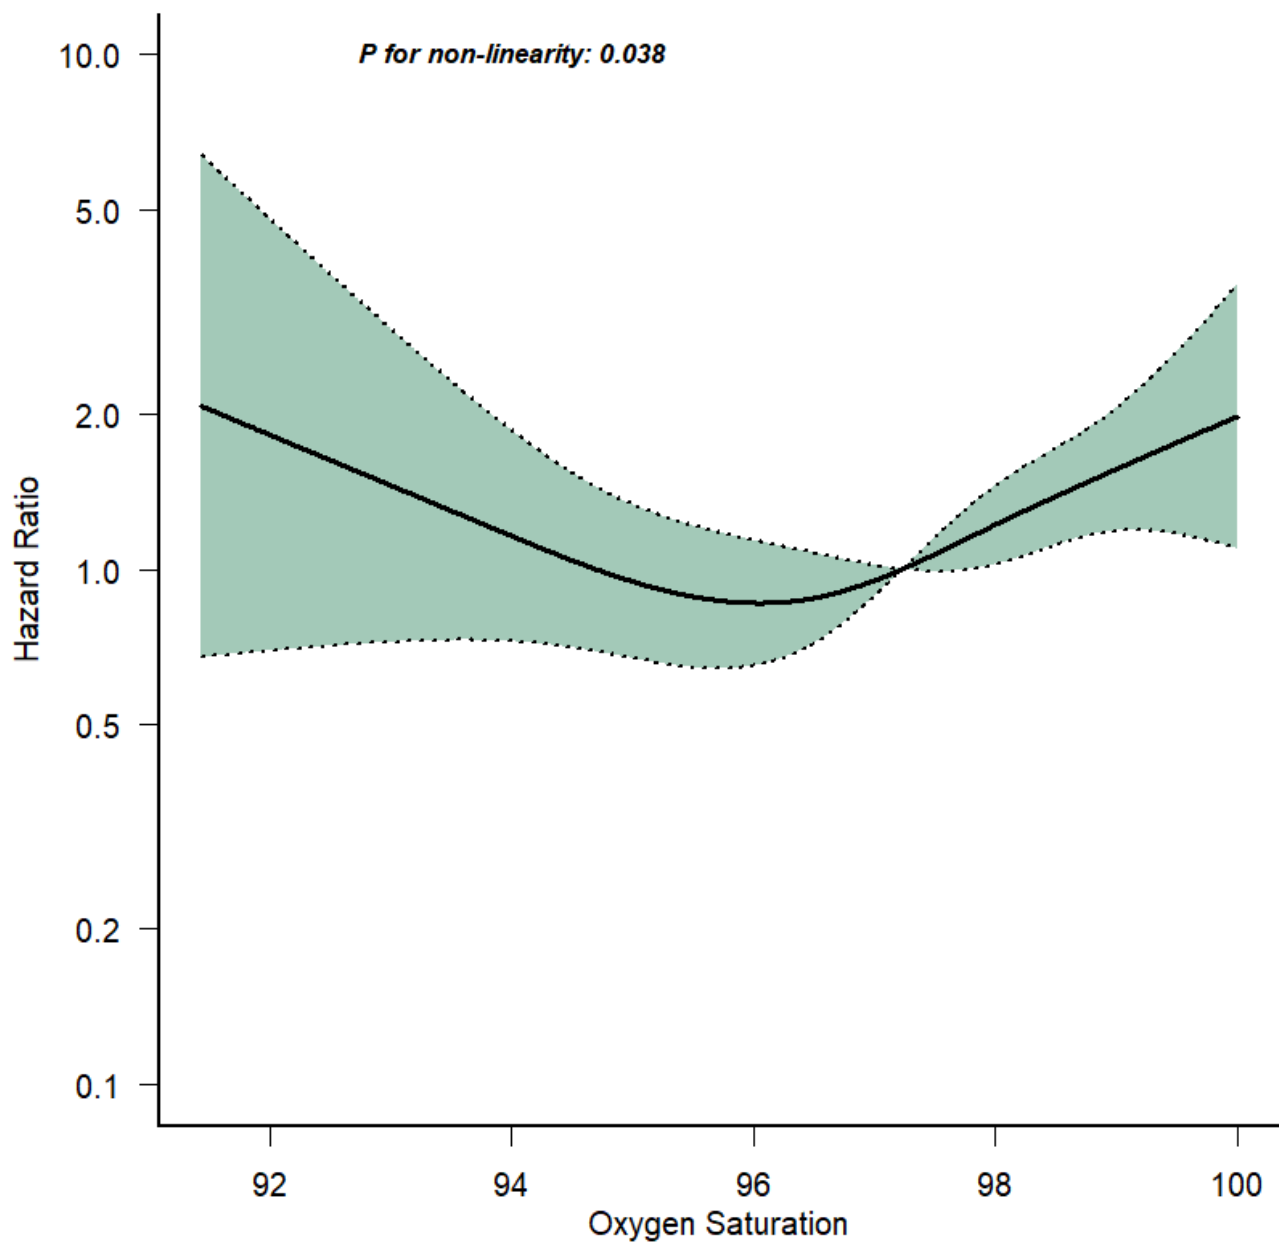

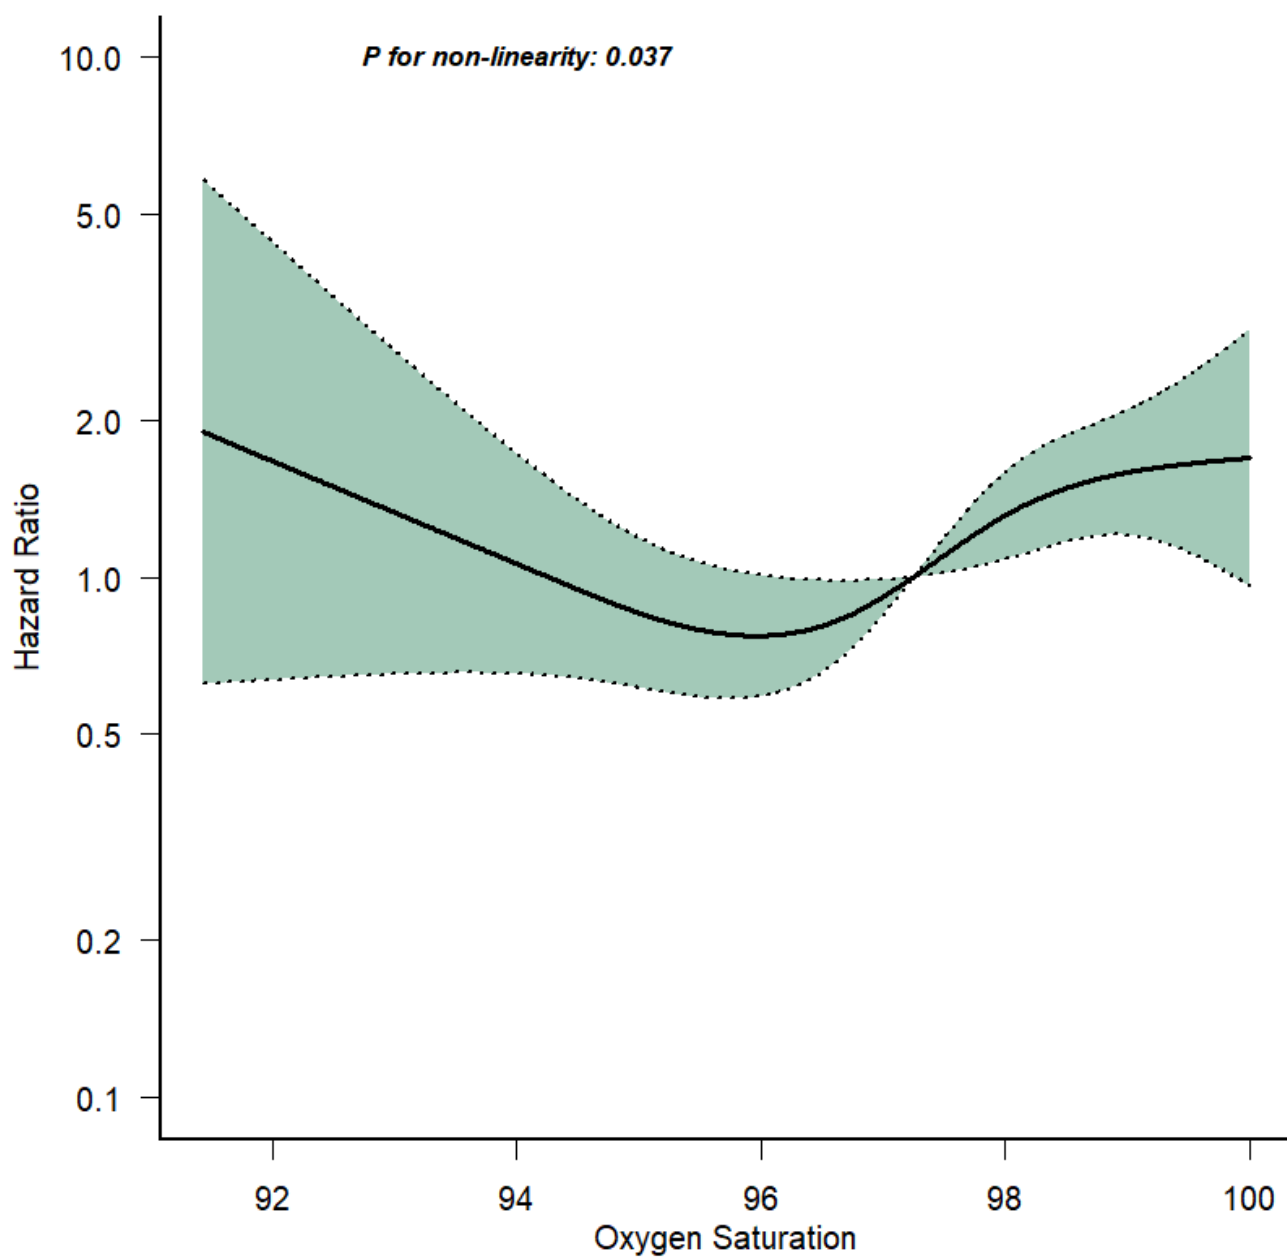

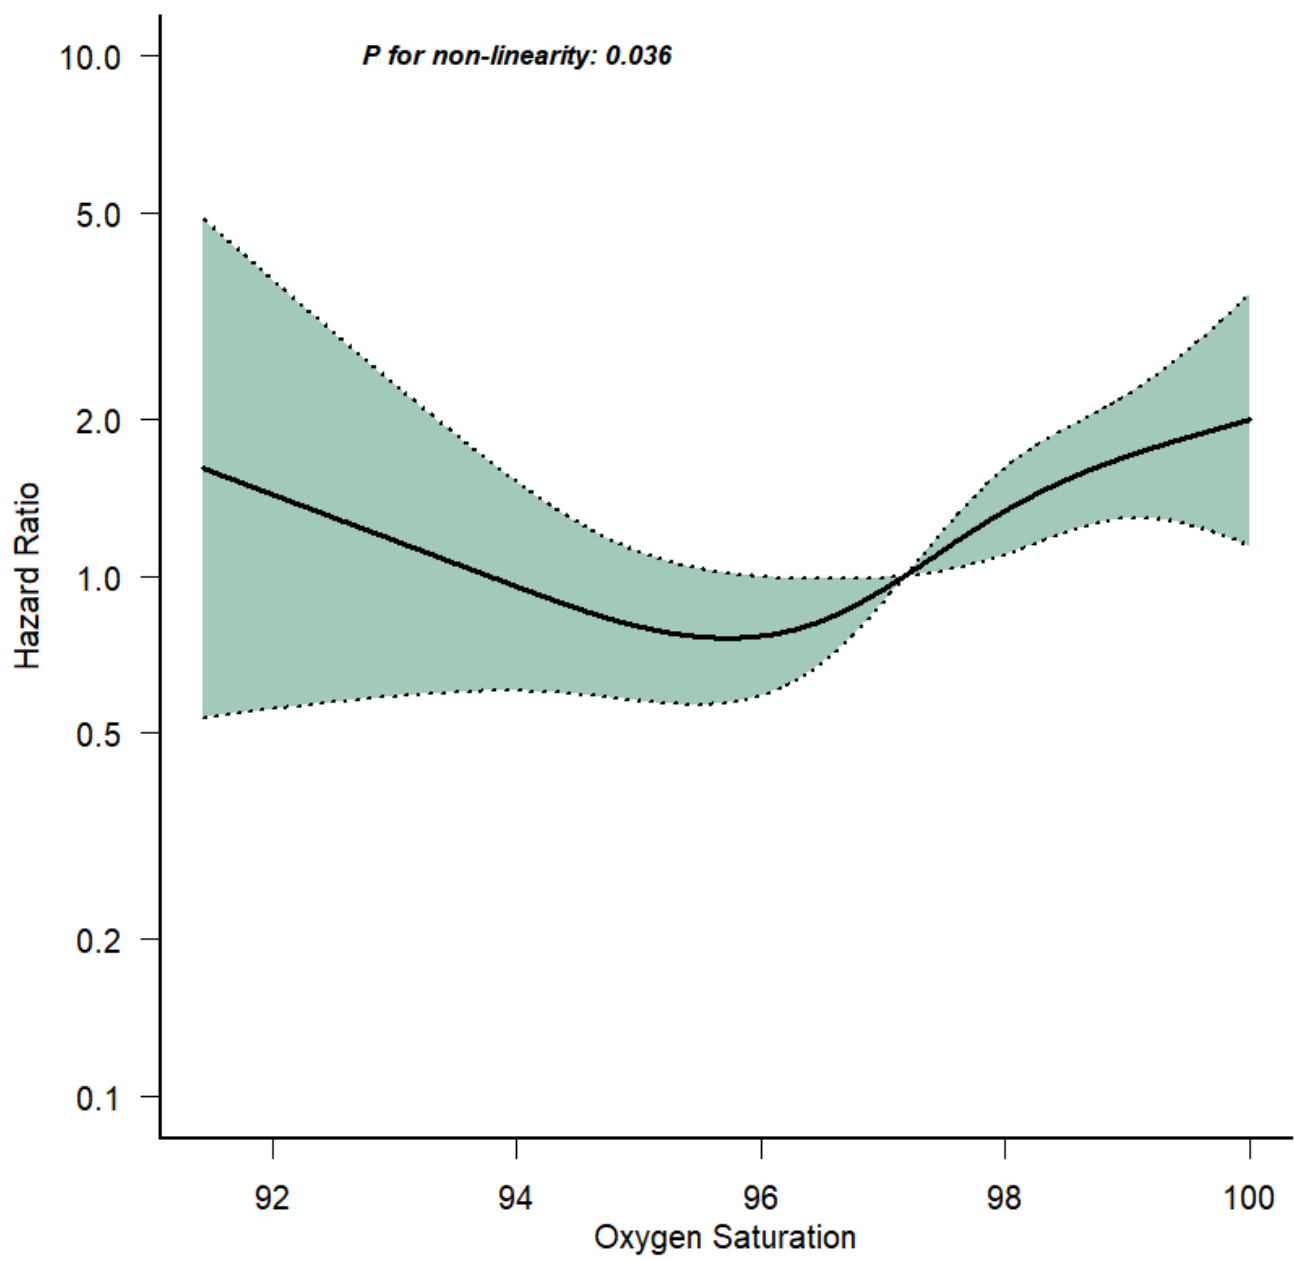

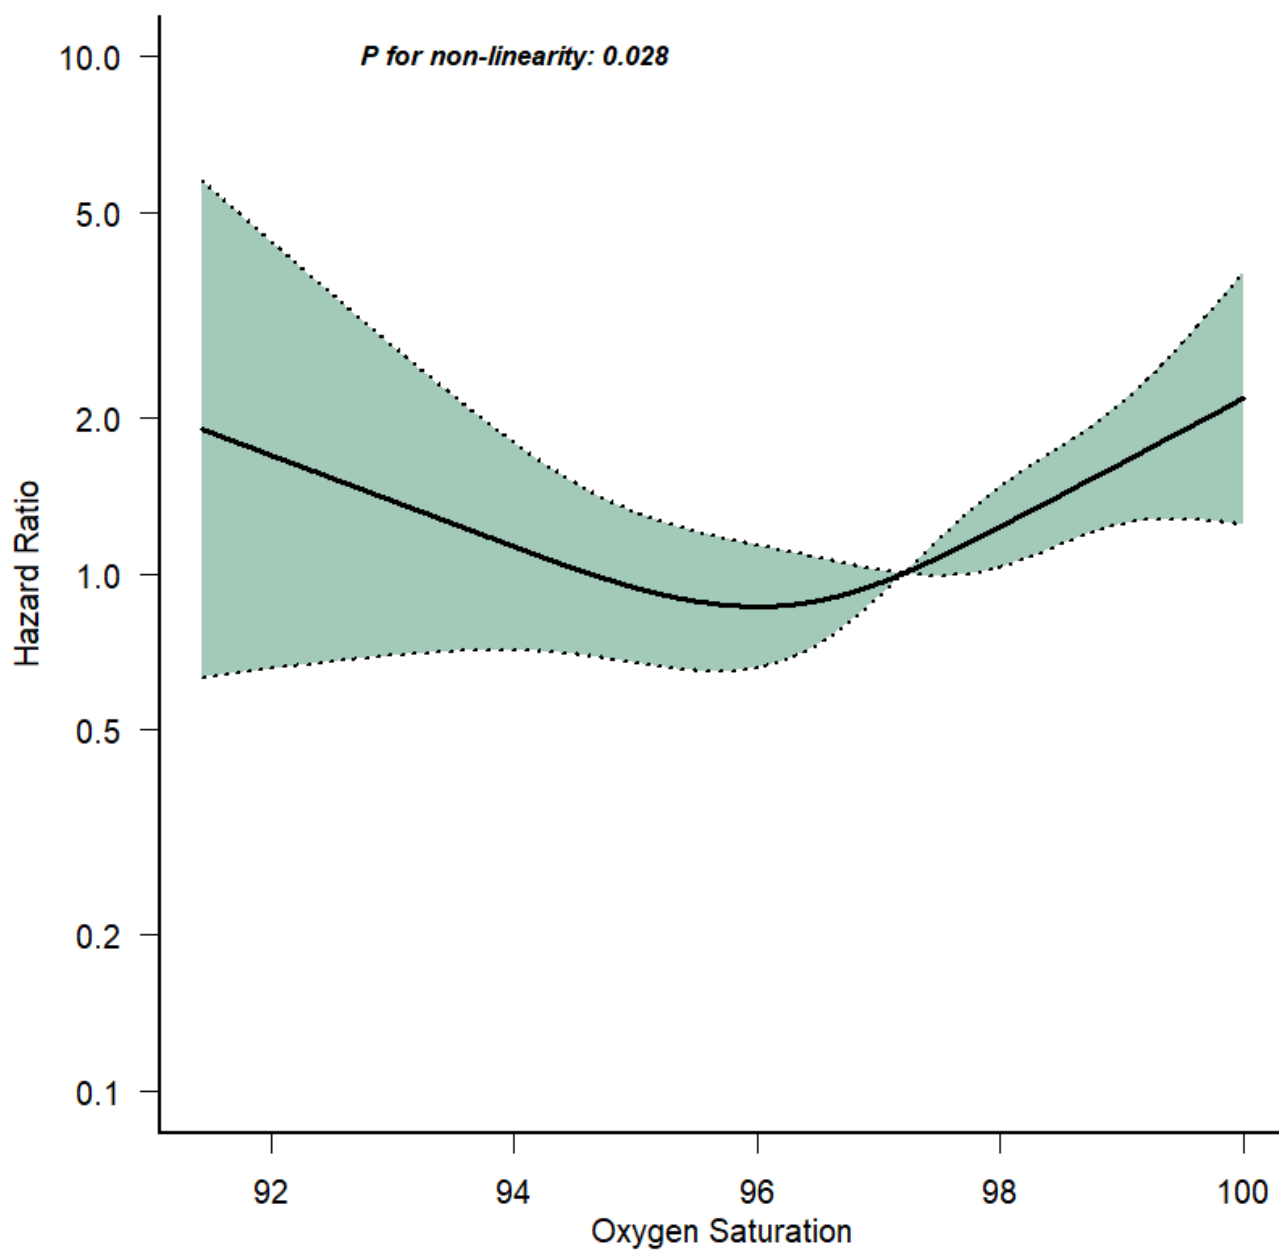



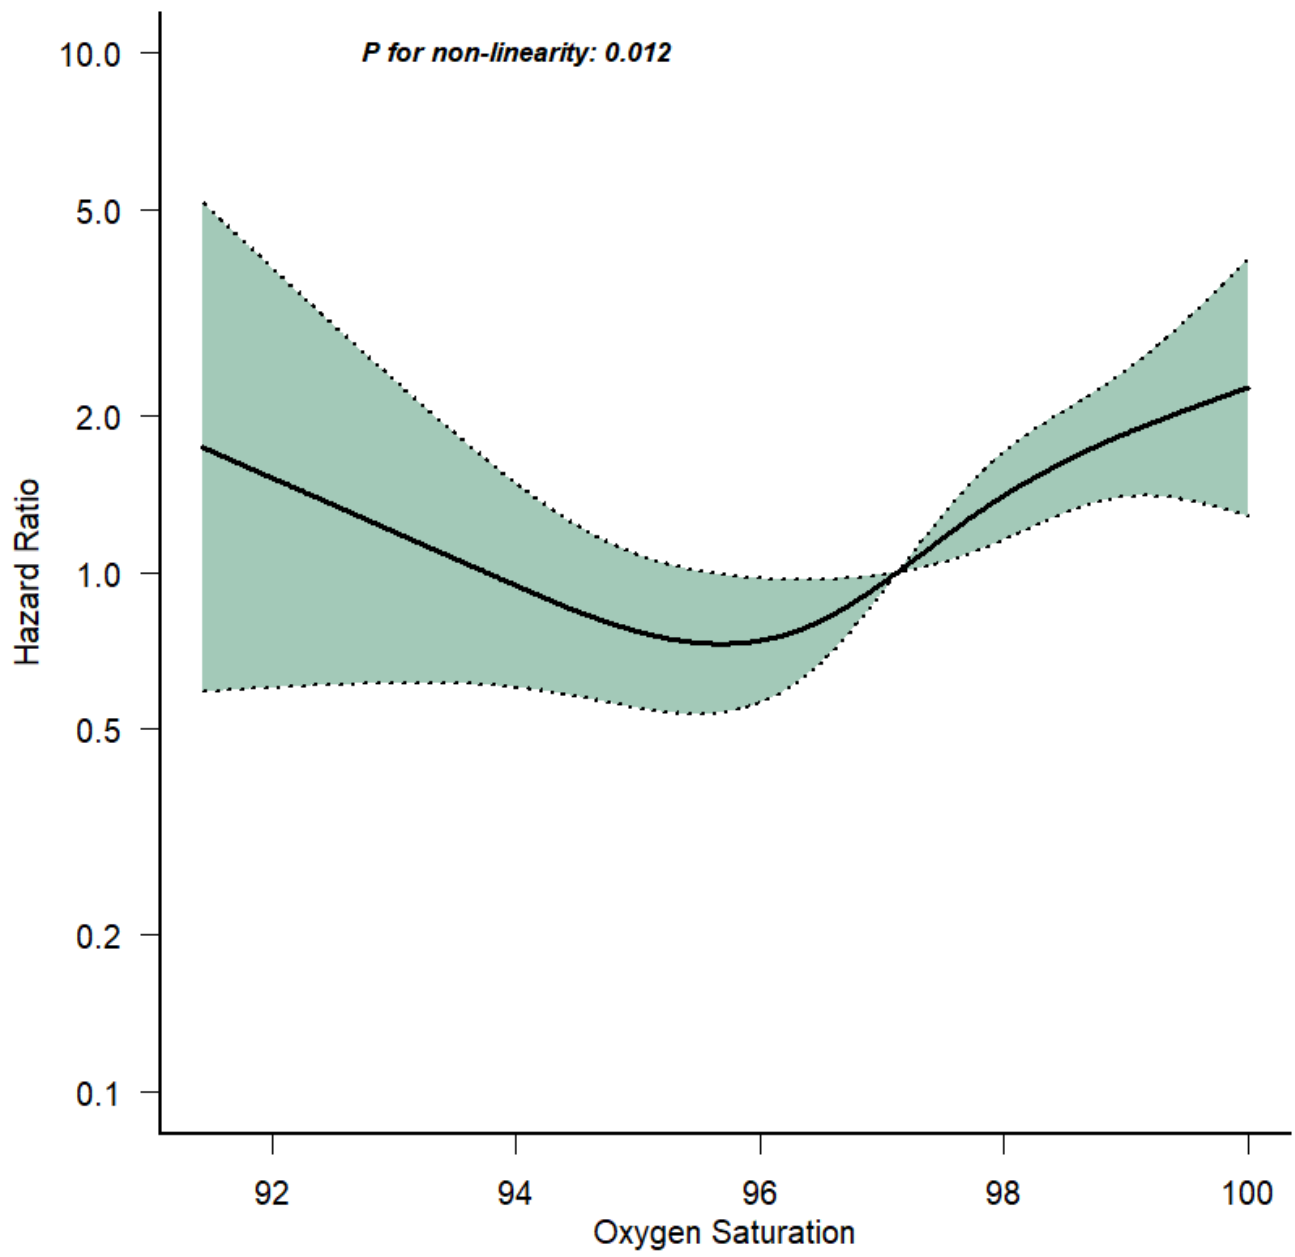

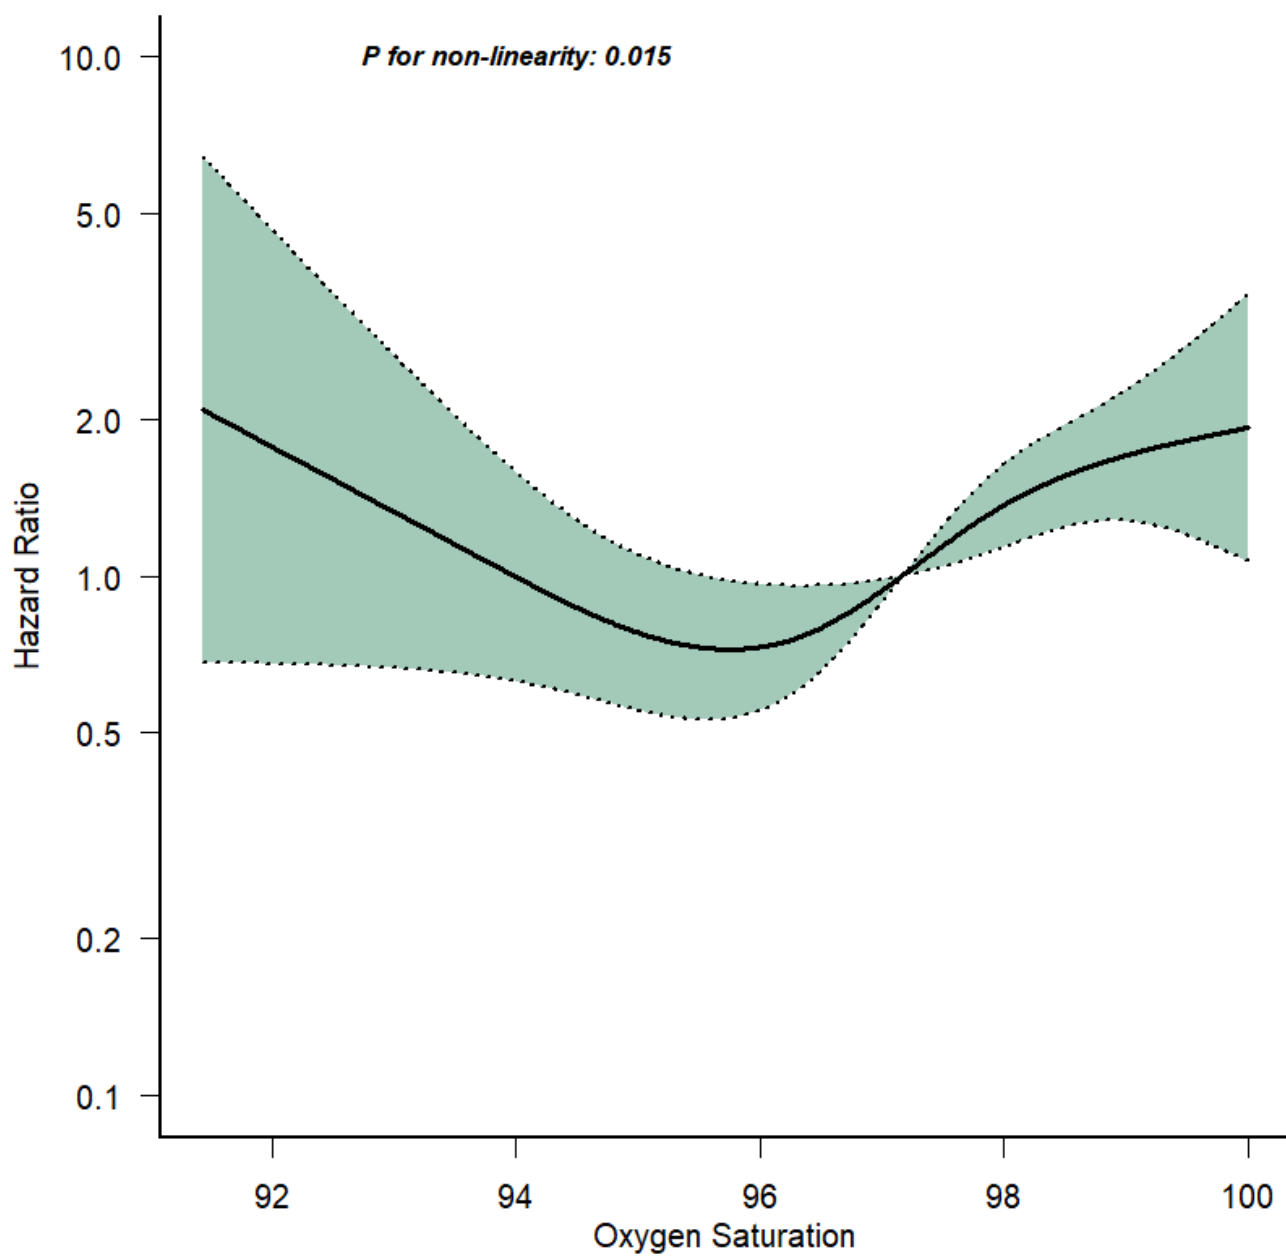

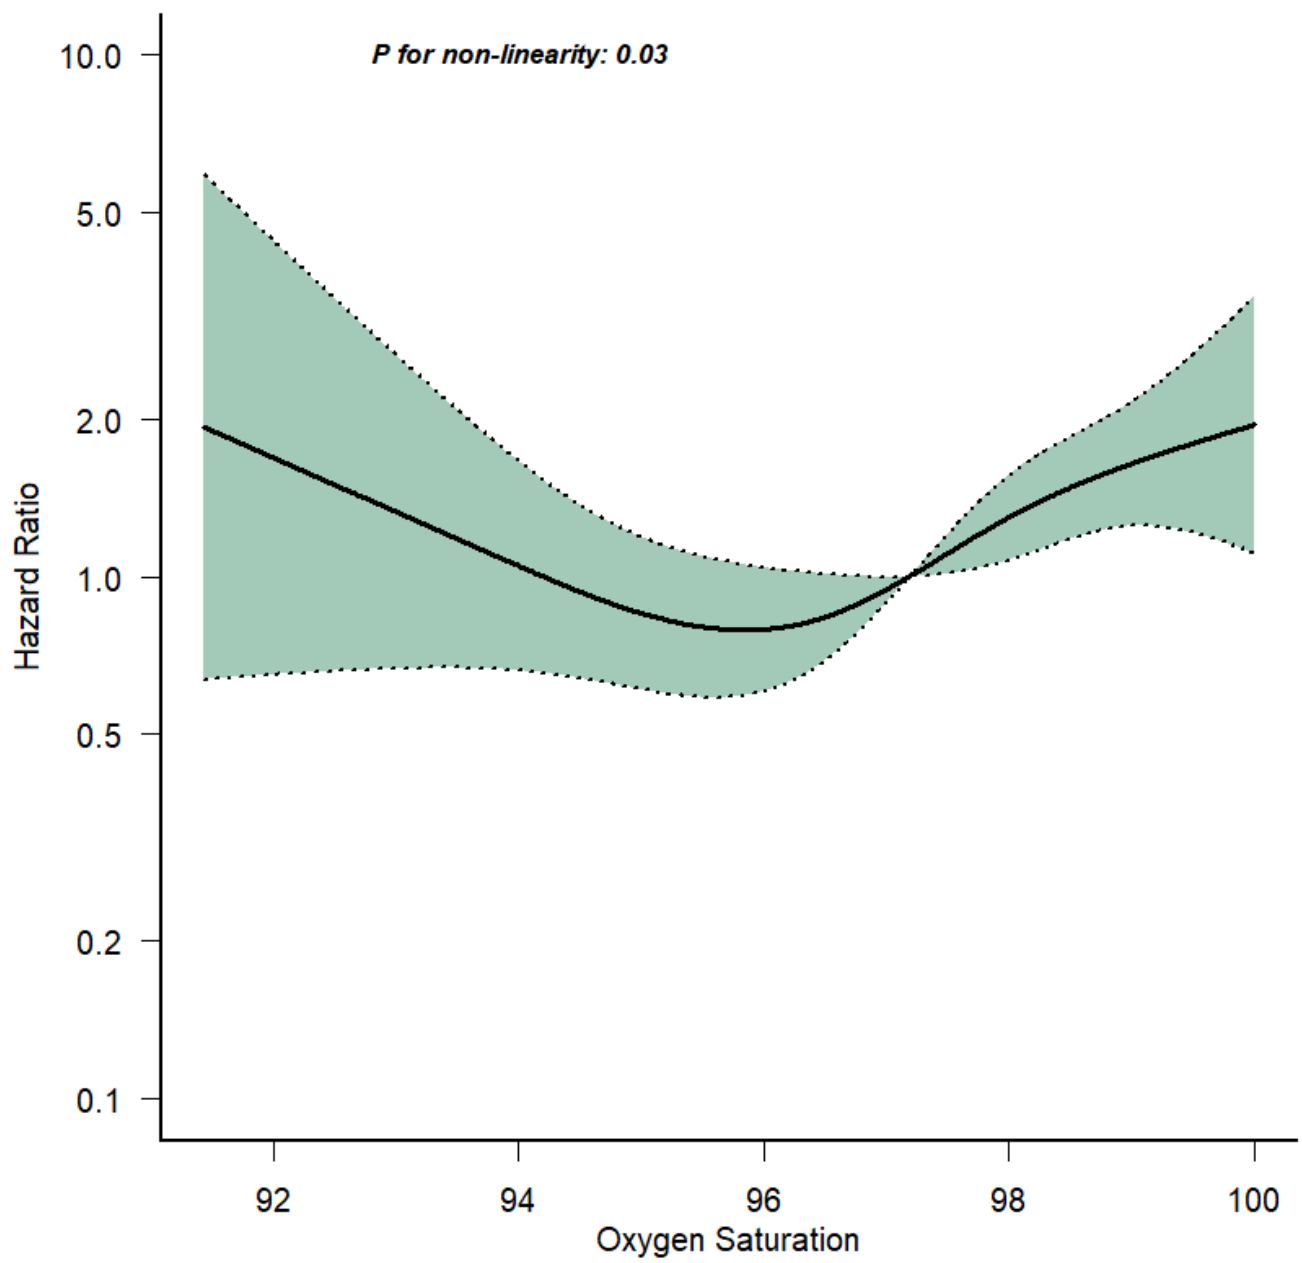

Supplement: Data_Sheet_1.PDF [file Data_Sheet_1.PDF]
